# Supplementary material for: A Consensus Network of Gene Regulatory Factors in the Human Frontal Lobe
Source: Front Genet. 2016 Mar 8;7:31. doi: 10.3389/fgene.2016.00031 (PMC4782181; doi:10.3389/fgene.2016.00031)
Supplement: Supplementary file 1 [file Table1.XLSX]

## Sheet: TableS1
Table S1
Census of gene regulatory factors involved in brain function and disorder
For GRFs associated with mental retardation/intellectual disability we used both nomenclature to specify the type of ID (Eg. Autism, Intellectual Disability, Mental retardation, X-linked, FRAXE type)
Gene_symbol	Complete_GeneName	FMRP targets	Association	25363760	UNIPROT_ID	Synonymes
AATF	apoptosis antagonizing transcription factor		Chromosome 17q12 microdeletion syndrome	22178801	Q9NY61	CHE-1|CHE1|DED
ABCA2	ATP-binding cassette, sub-family A (ABC1), member 2	FMRP	Alzheimer's disease	23181169	Q9BZC7	-
ABCG1	ATP-binding cassette, sub-family G (WHITE), member 1	FMRP	Alzheimer's disease	23181169	P45844	-
ACTR5	Actin-Related Protein 5 Homolog		Schizophrenia	25056061	Q9H9F9	-
ADNP	activity-dependent neuroprotector homeobox	FMRP	Autism, Brain Development	23272107	Q9H2P0	ADNP1
ADORA2A	adenosine A2a receptor		Autism	19565319	P29274	-
ADRB2	adrenoceptor beta 2, surface		Autism, Alzheimer's disease	17199132; 18423577	P07550	ADRB2R|ADRBR|B2AR|BAR|BETA2AR
AEBP2	AE binding protein 2		Brain Development	21949878	Q6ZN18	-
AFF2	AF4/FMR2 family, member 2		Autism, Intellectual Disability, Mental retardation, X-linked, FRAXE type	15020472; 22482801; 21910631; 18694825	P51816	FMR2|FMR2P|FRAXE|MRX2|OX19
AFF3	AF4/FMR2 family, member 3	FMRP		21784246	Q8NAP7,P51826	LAF4|MLLT2-LIKE
AFF4	AF4/FMR2 family, member 4	FMRP	Autism	21572417	Q9UHB7	AF5Q31|MCEF
AHDC1	AT hook, DNA binding motif, containing 1	FMRP		21784246	Q5TGY3	CL23945|DJ159A19.3|RP1-159A19.1
AKAP9	A kinase (PRKA) anchor protein (yotiao) 9	FMRP		21784246	Q5GIA7,Q6PJH3,Q99996	AKAP-9|AKAP350|AKAP450|CG-NAP|HYPERION|LQT11|MU-RMS-40.16A|PPP1R45|PRKA9|YOTIAO
ALX1	ALX homeobox 1		Frontonasal dysplasia 2	24376213	Q15699	CART1|FND3
ALX3	ALX homeobox 3		Frontonasal dysplasia 2	24376213	O95076	FND1
ALX4	ALX homeobox 4		Frontonasal dysplasia 2	24376213	Q9H161	FND2
ANP32A	acidic (leucine-rich) nuclear phosphoprotein 32 family, member A		Spinocerebellar ataxia	23630944	P39687	C15ORF1|HPPCN|I1PP2A|LANP|MAPM|PHAP1|PHAPI|PP32
APBB1	amyloid beta (A4) precursor protein-binding, family B, member 1 (Fe65)	FMRP		21784246	B7Z3G1,B7Z2A2,Q7Z324,B7Z4M9,O00213,B7Z1J6,B7Z1J5	FE65|MGC:9072|RIR
APBB2	amyloid beta (A4) precursor protein-binding, family B, member 2		Alzheimer's disease	18852029	B4DJ88,B4E2F2,Q92870	FE65L|FE65L1
APC	adenomatous polyposis coli	FMRP	Autism, Schizophrenia, Parkinsons's disease	8071957; 15768050; 25061051	Q4LE70,P25054,B7Z2B6	BTPS2|DP2|DP2.5|DP3|GS|PPP1R46
APP	amyloid beta (A4) precursor protein	FMRP	Autism, Alzheimer's disease	17325276	E9PG40,B4DII8,E9PEV0,B4DJT9,P05067,B4DGD0	AAA|ABETA|ABPP|AD1|APPI|CTFGAMMA|CVAP|PN-II|PN2
APTX	aprataxin		Intellectual Disability	15020472; 22482801; 21910631; 18694825	Q7Z2E3	AOA|AOA1|AXA1|EAOH|EOAHA|FHA-HIT
AR	androgen receptor		Autism	19167832	F1D8N5,P10275	AIS|DHTR|HUMARA|HYSP1|KD|NR3C4|SBMA|SMAX1|TFM
ARHGEF11	Rho guanine nucleotide exchange factor (GEF) 11	FMRP		21784246	O15085	-
ARID1A	AT rich interactive domain 1A (SWI-like)	FMRP	Mental retardation, autosomal dominant 14 (ID)	20942669	O14497	B120|BAF250|BAF250A|BM029|C1ORF4|ELD|MRD14|OSA1|P270|SMARCF1|HELD|HOSA1
ARID1B	AT rich interactive domain 1B (SWI1-like)	FMRP	Autism, Mental retardation, autosomal dominant 12 (ID)	22405089	Q8NFD5	6A3-5|BAF250B|BRIGHT|DAN15|ELD/OSA1|MRD12|OSA2|P250R
ARID2	AT rich interactive domain 2 (ARID, RFX-like)	FMRP		21784246	Q68CP9	BAF200|P200
ARID5B	AT rich interactive domain 5B (MRF1-like)		Alzheimer's disease	21798052	Q14865	DESRT|MRF-2|MRF2
ARNT2	aryl-hydrocarbon receptor nuclear translocator 2	FMRP	Autism	19598235	Q86TN1,Q9HBZ2,Q7Z3A3	BHLHE1
ARNTL	aryl hydrocarbon receptor nuclear translocator-like		Circadian rythm, Bipolar disorder	19839995	O00327	BMAL1|BMAL1C|JAP3|MOP3|PASD3|TIC|BHLHE5
ARNTL2	aryl hydrocarbon receptor nuclear translocator-like 2		Circadian rythm, Bipolar disorder	24520124	Q8WYA1	BMAL2|CLIF|MOP9|PASD9|BHLHE6
ARRB1	arrestin, beta 1	FMRP		21784246	B7Z1Q3,P49407	ARB1|ARR1
ARX	aristaless related homeobox		Autism, Intellectual Disability, Autism, Lissencephaly, Hydranencephaly, Epilepsy, Mental retardation X-linked	15020472; 22482801; 21910631; 18694825; 22642246; 12379852	Q96QS3	CT121|EIEE1|ISSX|MRX29|MRX32|MRX33|MRX36|MRX38|MRX43|MRX54|MRX76|MRX87|MRXS1|PRTS
ASB11	ankyrin repeat and SOCS box containing 11		Brain Development	16893969	Q7Z670,Q8WXH4,E9PEN1	-
ASCL1	achaete-scute complex homolog 1 (Drosophila)		Intellectual Disability, Brain Development	15020472; 22482801; 21910631; 18694825; 12050665	P50553	ASH1|HASH1|MASH1|BHLHA46
ASH1L	ash1 (absent, small, or homeotic)-like (Drosophila)	FMRP		21784246	Q9NR48	ASH1|ASH1L1|KMT2H
ASXL1	additional sex combs like 1 (Drosophila)		Bohring-Opitz syndrome	24255920	Q498B9,Q8IXJ9	BOPS|MDS
ATF2	activating transcription factor 2		Brain Development	19255142	A4D7V5,G8JLM5,Q3B7B7,P15336,A4D7U4	CRE-BP1|CREB2|HB16|TREB7
ATF4	activating transcription factor 4 (tax-responsive enhancer element B67)		Brain Development	25071442	Q96AQ3,P18848	CREB-2|CREB2|TAXREB67|TXREB
ATF5	activating transcription factor 5		Brain Development	15950153	Q9Y2D1	ATFX|HMFN0395
ATF6B	activating transcription factor 6 beta		Schizophrenia	25056061	Q6AZW6,Q99941	CREB-RP|CREBL1|G13
ATF7	activating transcription factor 7		Alzheimer's disease	16770605	P17544	ATFA
ATF7IP	activating transcription factor 7 interacting protein	FMRP		21784246	B3KNI7,Q6VMQ6,B3KQF8	AM|MCAF|MCAF1|P621
ATM	ataxia telangiectasia mutated		Schizophrenia, Ataxia-telangiectasia	19115993; 25127855	Q13315	AT1|ATA|ATC|ATD|ATDC|ATE|TEL1|TELO1
ATMIN	ATM interactor	FMRP		21784246	O43313	ASCIZ|ZNF822
ATN1	atrophin 1	FMRP	Intellectual Disability	15020472; 22482801; 21910631; 18694825	Q86V38,P54259	B37|D12S755E|DRPLA|HRS|NOD
ATOH1	atonal homolog 1 (Drosophila)		Brain Development	24904172	Q92858	ATH1|HATH1|MATH-1|BHLHA14
ATRX	alpha thalassemia/mental retardation syndrome X-linked		Intellectual Disability, Mental retardation-hypotonic facies syndrome, X-linked, Autism	15020472; 22482801; 21910631; 18694825	P46100	ATR2|JMS|MRXHF1|RAD54|RAD54L|SFM1|SHS|XH2|XNP|ZNF-HX
ATXN1	ataxin 1	FMRP	Alzheimer's disease, Spinocerebellar ataxia 1	22486522; 24972706	Q96FF1,P54253	ATX1|D6S504E|SCA1
ATXN2	ataxin 2		Spinocerebellar ataxia 2	24972706	Q99700	ASL13|ATX2|SCA2|TNRC13
ATXN3	Ataxin 3		Schizophrenia	25056061	Q4VBR4	-
ATXN7	ataxin 7		Autism, Spinocerebellar ataxia 7	24972706	O15265,Q9UPD8	ADCAII|OPCA3|SCA7
BARHL1	BarH-like homeobox 1		Joubert syndrome, Brain Development	15487006; 16384683	Q9BZE3	-
BAZ1B	bromodomain adjacent to zinc finger domain, 1B		Williams-Beuren syndrome	23756441	Q9UIG0	WBSCR10|WBSCR9|WSTF
BAZ2A	bromodomain adjacent to zinc finger domain, 2A	FMRP		21784246	Q9UIF9	TIP5|WALP3
BCL11A	B-cell CLL/lymphoma 11A (zinc finger protein)		Brain Development	19616629	D6W5D9,Q9H165,D9YZV9	BCL11A-L|BCL11A-S|BCL11A-XL|BCL11A-M|CTIP1|EVI9|HBFQTL5|ZNF856
BCL11B	B-cell CLL/lymphoma 11B (zinc finger protein)		Schizophrenia	25056061	Q9C0K0	CTIP-2|CTIP2|RIT1|ZNF856B|HRIT1-ALPHA
BCL2	B-cell CLL/lymphoma 2		Autism	20375269	P10415,C9JHD5	BCL-2|PPP1R50
BCL9L	B-Cell CLL/Lymphoma 9-Like	FMRP		21784246	Q86UU0	-
BCOR	BCL6 corepressor		Intellectual Disability, Microphthalmia, syndromic 2	15020472; 22482801; 21910631; 18694825	Q6W2J9	ANOP2|MAA2|MCOPS2
BEX1	brain expressed, X-linked 1		Brain Development	16498402	Q9HBH7	BEX2|HBEX2|HGR74-H
BHLHA9	basic helix-loop-helix family, member a9		Miller-Dieker lissencephaly syndrome	23035971	Q7RTU4	BHLHF42
BIN1	bridging integrator 1		Autism, Alzheimer's disease	25024306	O00499,Q9BTH3	AMPH2|AMPHL|SH3P9
BMP4	bone morphogenetic protein 4		Microphthalmia, syndromic 6	12794703	Q53XC5,P12644	BMP2B|BMP2B1|MCOPS6|OFC11|ZYME
BMP6	bone morphogenetic protein 6		Schizophrenia	19694819	P22004	-
BPTF	bromodomain PHD finger transcription factor	FMRP		21784246	Q12830	FAC1|FALZ|NURF301
BRCA2	breast cancer 2, early onset		Autism	22495311	P51587	BRCC2|BROVCA2|FACD|FAD|FAD1|FANCB|FANCD|FANCD1|GLM3|PNCA2
BRD1	bromodomain containing 1		Schizophrenia	19693800	O95696	BRL|BRPF1|BRPF2
BRD2	bromodomain containing 2		Juvenile myoclonic epilepsy	22787611	Q63HQ9,P25440,Q658Y7	D6S113E|FSH|FSRG1|NAT|RING3|RNF3
BRD4	bromodomain containing 4	FMRP		21784246	O60885,Q4G0X8	CAP|HUNK1|HUNKI|MCAP
BSX	brain-specific homeobox		Jacobsen syndrome	18855024	Q3C1V8	BSX1
BTAF1	BTAF1 RNA polymerase II, B-TFIID transcription factor-associated, 170kDa (Mot1 homolog, S. cerevisiae)		Autism	22016809	Q8N6J1,O14981,Q2M1V9	MOT1|TAF(II)170|TAF172|TAFII170
BTBD6	BTB (POZ) domain containing 6		Chromosome 14q32.3 deletion syndrome	22488736	Q96KE9	BDPL
C11orf30	Chromosome 11 open reading frame 30		Autism	25494366	Q7Z589	-
CAMKK2	calcium/calmodulin-dependent protein kinase kinase 2, beta	FMRP		21784246	Q96RR4	-
CAMTA1	calmodulin binding transcription activator 1	FMRP	Autism, Cerebellar ataxia, nonprogressive, with mental retardation	22031302; 24738973	G3V3Z7,Q9Y6Y1	CANPMR
CAMTA2	calmodulin binding transcription activator 2	FMRP		21784246	E7EWU5,O94983	-
CAND1	cullin-associated and neddylation-dissociated 1	FMRP		21784246	Q86VP6	TIP120|TIP120A
CASK	calcium/calmodulin-dependent serine protein kinase (MAGUK family)		Intellectual Disability, FG syndrome, Mental retardation and microcephaly with pontine and cerebellar hypoplasia	15020472; 22482801; 21910631; 18694825; 23901204	O14936	CAGH39|CAMGUK|CMG|FGS4|LIN2|MICPCH|MRXSNA|TNRC8
CBL	Cbl proto-oncogene, E3 ubiquitin protein ligase		Noonan syndrome	24458550	P22681	C-CBL|CBL2|FRA11B|NSLL|RNF55
CBX6	chromobox homolog 6	FMRP		21784246	O95503	-
CC2D1A	coiled-coil and C2 domain containing 1A		Intellectual Disability, Mental retardation, autosomal recessive 3	15020472; 22482801; 21910631; 18694825	Q6P1N0	FREUD-1|FREUD-1/AKI1|MRT3
CDK5	cyclin-dependent kinase 5		Alzheimer's disease, Parkinson's disease	18350355; 25104559	Q00535	PSSALRE
CDK8	cyclin-dependent kinase 8		Intellectual Disability	15020472; 22482801; 21910631; 18694825	P49336	K35
CDKN1B	cyclin-dependent kinase inhibitor 1B (p27, Kip1)		Autism	23505216	P46527,Q6I9V6	CDKN4|KIP1|MEN1B|MEN4|P27KIP1
CDKN1C	cyclin-dependent kinase inhibitor 1C (p57, Kip2)		Beckwith-Wiedemann syndrome	1915515	P49918	BWCR|BWS|IMAGE|KIP2|WBS|P57
CDX2	caudal type homeobox 2		Alzheimer's disease	22306846	Q99626	CDX-3|CDX3
CENPT	centromere protein T		Schizophrenia	25056061	B3KPB2,Q96BT3	C16ORF56|CENP-T
CHD2	chromodomain helicase DNA binding protein 2		Autism, Epileptic encephalopathy	23020937	O14647	-
CHD3	chromodomain helicase DNA binding protein 3	FMRP		21784246	E9PG89,Q12873,Q2TAZ1,B3KWV4	MI-2A|MI2-ALPHA|ZFH
CHD4	chromodomain helicase DNA binding protein 4	FMRP		21784246	B3KY63,Q14839,Q05CG6	MI-2B|MI2-BETA
CHD5	chromodomain helicase DNA binding protein 5	FMRP		21784246	Q8TDI0	CHD-5
CHD6	chromodomain helicase DNA binding protein 6	FMRP	Pitt-Hopkins syndrome	18627065	Q8TD26	CHD5|RIGB
CHD7	chromodomain helicase DNA binding protein 7		Intellectual Disability, CHARGE syndrome, Autism	15020472; 22482801; 21910631; 18694825; 25119037	Q9P2D1,Q6ZWF9	HH5|IS3|KAL5
CHD8	chromodomain helicase DNA binding protein 8	FMRP	Autism	20972252	Q9HCK8	HELSNF1
CHMP1A	charged multivesicular body protein 1A		Pontocerebellar hypoplasia, type 8	23023333	Q9HD42	-
CIC	capicua homolog (Drosophila)	FMRP		21784246	Q96RK0	-
CLOCK	clock circadian regulator		Circadian rythm, Bipolar disorder, Schizophrenia	25071478; 18228528	Q53EU0,O15516,Q3ZCT4	KAT13D|BHLHE8
CNBP	CCHC-type zinc finger, nucleic acid binding protein		Myotonic dystrophy 2	24907641	Q4JGY1,P62633,A8K7V4,E9PDR7	CNBP1|DM2|PROMM|RNF163|ZCCHC22|ZNF9
CNOT1	CCR4-NOT transcription complex, subunit 1		Schizophrenia	25056061	A5YKK6	CDC39|NOT1|NOT1H
COIL	coilin		Brain Development	12361597	P38432	CLN80|P80-COILIN
COPS3	COP9 constitutive photomorphogenic homolog subunit 3 (Arabidopsis)		Smith-Magenis syndrome	10851253	Q9UNS2	CSN3|SGN3
CREB3L1	cAMP responsive element binding protein 3-like 1		Schizophrenia	25056061	Q96BA8	OASIS
CREBBP	CREB binding protein	FMRP	Intellectual Disability, Autism, Rubinstein-Taybi syndrome	15020472; 22482801; 21910631; 18694825; 7630403	Q4LE28,Q92793	CBP|KAT3A|RSTS
CREM	cAMP responsive element modulator		Panic Disorder	15048659	A8MPQ2,E9PHM1,C9J785,Q5W1A7,E9PAR4,Q03060,C9JZ10	CREM-2|ICER|HCREM-2
CRTC1	CREB regulated transcription coactivator 1	FMRP		21784246	Q6UUV9	MECT1|TORC-1|TORC1|WAMTP1
CRY1	cryptochrome 1 (photolyase-like)		Circadian rythm, Bipolar disorder	20072116	Q16526,A2I2P0	PHLL1
CRY2	cryptochrome circadian clock 2		Circadian rythm, Bipolar disorder	20072116	Q49AN0	-
CTBP1	C-terminal binding protein 1	FMRP		21784246	Q13363	BARS
CTCF	CCCTC-binding factor (zinc finger protein)		Autism, Mental retardation, autosomal dominant 21 (ID)	23746550	P49711	-
CTDP1	CTD (carboxy-terminal domain, RNA polymerase II, polypeptide A) phosphatase, subunit 1		Intellectual Disability, Congenital cataracts, facial dysmorphism, and neuropathy	15020472; 22482801; 21910631; 18694825; 24690360	Q9Y5B0	CCFDN|FCP1
CTNNB1	catenin (cadherin-associated protein), beta 1, 88kDa	FMRP	Autism, Mental retardation, autosomal dominant 19 (ID)	23033978	P35222	CTNNB
CTNND1	catenin (cadherin-associated protein), delta 1		Schizophrenia	25056061	O60716	CAS|CTNND|P120CAS|P120CTN|P120|P120(CAS)|P120(CTN)
CTNND2	catenin (cadherin-associated protein), delta 2	FMRP		21784246	Q9UQB3	-
CUL2	cullin 2		Parkinson's Disease	22438815	Q13617	-
CUL3	cullin 3		Autism	22495309	B7Z600,Q13618	CUL-3|PHA2E
CUL4B	cullin 4B		Intellectual Disability, Mental retardation, X-linked, syndromic 15	15020472; 22482801; 21910631; 18694825	Q13620	MRXHF2|MRXS15|MRXSC|SFM2
CUX1	cut-like homeobox 1	FMRP		21784246	Q3LIA3,J3KQV9,J3KPQ6,B3KV79,B3KWH8,Q13948,P39880,G3V1Z6,B4DZZ2	CASP|CDP|CDP/CUT|CDP1|COY1|CUTL1|CUX|CLOX|CUX/CDP|GOLIM6|NBLA10317|P100|P110|P200|P75
CUX2	cut-like homeobox 2	FMRP	Bipolar disorder	11353453	O14529	CDP2|CUTL2
DBX1	developing brain homeobox 1		Brain Development	24553291	A6NMT0	-
DBX2	developing brain homeobox 2		Brain Development	19710170	Q6ZNG2	-
DEAF1	DEAF1 transcription factor		Autism, Mental retardation, autosomal dominant 24 (ID)	21076407	O75398	NUDR|SPN|ZMYND5
DEPDC5	DEP domain containing 5		Autism, Epilepsy, familial focal, with variable foci	23542697	O75140,B9EGN9	DEP.5
DIDO1	death inducer-obliterator 1	FMRP		21784246	Q9BTC0	BYE1|C20ORF158|DATF-1|DATF1|DIDO2|DIDO3|DIO-1|DIO1|DJ885L7.8
DIP2C	DIP2 disco-interacting protein 2 homolog C (Drosophila)	FMRP		21784246	Q9Y2E4,Q86XV3	KIAA0934
DLX1	distal-less homeobox 1		Autism, Schizophrenia	18728693; 18384059	P56177	-
DLX2	distal-less homeobox 2		Autism	18728693	Q53QU7,Q07687	TES-1|TES1
DLX5	distal-less homeobox 5		Rett syndrome, Brain Development	23348913; 20392955	Q53Y73,P56178	SHFM1D
DLX6	distal-less homeobox 6		Autism, Rett syndrome	19195802; 15954098	J3KR92,P56179	-
DNMT1	DNA (cytosine-5-)-methyltransferase 1		Neuropathy, hereditary sensory, type IE	25033457	P26358,I6L9H2	AIM|CXXC9|DNMT|HSN1E|MCMT
DNMT3A	DNA (cytosine-5-)-methyltransferase 3 alpha		Tatton-Brown-Rahman syndrome	24614070	E9PEB8,Q9Y6K1	DNMT3A2|M.HSAIIIA
DNMT3B	DNA (cytosine-5-)-methyltransferase 3 beta		Schizophrenia	24859147	E7EN63,Q9UBC3,B4DSM8,B4DSU1,E9PBF2	ICF|ICF1|M.HSAIIIB
DOT1L	DOT1-like, histone H3 methyltransferase (S. cerevisiae)	FMRP		21784246	Q8TEK3	DOT1|KMT4
DTX1	deltex homolog 1 (Drosophila)	FMRP	Brain Development	10531053	Q86Y01	HDX-1
DUX4	double homeobox 4		Facioscapulohumeral muscular dystrophy	21446026	F5GZ66	DUX10
DVL1	dishevelled, dsh homolog 1 (Drosophila)		Alzheimer's disease	11803455	O14640	DVL|DVL1L1
EBF3	early B-cell factor 3		Alzheimer's disease, Schizophrenia	17317784; 18813210	Q9H4W6	COE3|EBF-3|O/E-2|OE-2
EGF	epidermal growth factor		Schizophrenia	24949465	E7EVD2,P01133	HOMG4|URG
EGR1	early growth response 1	FMRP	Brain Development	23763269	Q546S1,P18146	AT225|G0S30|KROX-24|NGFI-A|TIS8|ZIF-268|ZNF225
EGR2	early growth response 2		Autism	16709250	P11161	AT591|CMT1D|CMT4E|KROX20
EGR3	early growth response 3		Schizophrenia	17360599	B4DH80,Q06889,E7EW38,B4DHJ5	EGR-3|PILOT
EGR4	early growth response 4		Schizophrenia	17360599	G3V1T5,B7ZKU3,B2RAE3	NGFI-C|NGFIC|PAT133
EHMT1	euchromatic histone-lysine N-methyltransferase 1	FMRP	Autism, Kleefstra syndrome, Intellectual Disability	23232695	Q9H9B1	EUHMTASE1|EU-HMTASE1|FP13812|GLP|GLP1|KMT1D|BA188C12.1
EHMT2	euchromatic histone-lysine N-methyltransferase 2	FMRP		21784246	Q96KQ7	BAT8|C6ORF30|G9A|GAT8|KMT1C|NG36
ELF1	E74-like factor 1 (ets domain transcription factor)		Brain Development	12149647	E9PDQ9,Q6MZZ4,B4E2I5,P32519	-
ELP4	Elongator acetyltransferase complex subunit 4		Autism	26010655	Q96EB1	-
EMX1	empty spiracles homeobox 1		Brain Development	1353865	Q04741	-
EMX2	empty spiracles homeobox 2		Intellectual Disability, Schizencephaly	15020472; 22482801; 21910631; 18694825; 17506092	G3V305,Q04743	-
EN1	engrailed homeobox 1		Parkinson's disease	23863478	Q05925	-
EN2	engrailed homeobox 2		Autism, Parkinson's disease	15024396; 19291307	P19622	-
ENC1	ectodermal-neural cortex 1 (with BTB-like domain)	FMRP	Brain Development	9566959	Q53XS2,O14682	CCL28|ENC-1|KLHL35|KLHL37|NRPB|PIG10|TP53I10
EOMES	eomesodermin		Microcephaly	22002884	O95936	TBR2
EP300	E1A binding protein p300	FMRP	Autism, Intellectual Disability, Rubinstein-Taybi syndrome 2	15020472; 22482801; 21910631; 18694825; 24476420	Q7Z6C1,Q09472	KAT3B|RSTS2|P300
EP400	E1A binding protein p400	FMRP	Autism	21784246	Q96L91	CAGH32|P400|TNRC12
EPC2	enhancer of polycomb homolog 2 (Drosophila)		Autism, Alzheimer's disease	21123754	Q52LR7	-
ERBB2IP	v-erb-b2 erythroblastic leukemia viral oncogene homolog 2, neuro/glioblastoma derived oncogene homolog (avian)		Autism	20531469	P04626	CD340|HER-2|HER-2/NEU|HER2|MLN 19|NEU|NGL|TKR1
ERBB4	v-erb-a erythroblastic leukemia viral oncogene homolog 4 (avian)		Autism, Brain Development	25052836	Q15303	HER4|P180ERBB4
ERCC2	excision repair cross-complementing rodent repair deficiency, complementation group 2		Intellectual Disability, Cerebrooculofacioskeletal syndrome 2, Trichothiodystrophy	15020472; 22482801; 21910631; 18694825; 17273966	P18074	COFS2|EM9|TTD|XPD
ERCC3	excision repair cross-complementing rodent repair deficiency, complementation group 3		Intellectual Disability	15020472; 22482801; 21910631; 18694825	P19447	BTF2|GTF2H|RAD25|TFIIH|XPB
ERCC6	excision repair cross-complementing rodent repair deficiency, complementation group 6		Cerebrooculofacioskeletal syndrome 1, Cockayne syndrome, type B, De Sanctis-Cacchione syndrome	9443879; 10739753; 10767341	Q03468	ARMD5|CKN2|COFS|COFS1|CSB|RAD26|UVSS1
ERCC8	excision repair cross-complementing rodent repair deficiency, complementation group 8		Cockayne syndrome, type A	24324434	Q13216	CKN1|CSA|UVSS2
ERG	v-ets erythroblastosis virus E26 oncogene homolog (avian)		Autism	22843504	B4DVX5,P11308,B4DN83	ERG-3|P55
ESR1	estrogen receptor 1		Autism, Alzheimer's disease, Parkinson's disease	19598235; 16914837; 21469201	P03372,Q9UBT1,G4XH65	ER|ESR|ESRA|ERA|NR3A1
ESR2	estrogen receptor 2 (ER beta)		Autism, Parkinson's disease	19598235; 22155094	Q7LCB3,F1D8N3,Q92731	ER-BETA|ESR-BETA|ESRB|ESTRB|ERB|NR3A2
ESRRB	estrogen-related receptor beta		Autism	19404256	O95718	DFNB35|ERR2|ERRB|ESRL2|NR3B2
ETV1	ets variant 1		Brain Development	10850491	B7Z618,E9PHB1,B7Z2C9,F5GXR2,P50549	ER81
FAM171B	family with sequence similarity 171, member B	FMRP		21784246	Q6P995	KIAA1946
FBN1	fibrillin 1		Intellectual Disability	15020472; 22482801; 21910631; 18694825	P35555	ACMICD|ECTOL1|FBN|GPHYSD2|MASS|MFS1|OCTD|SGS|SSKS|WMS|WMS2
FBXL19	F-box and leucine-rich repeat protein 19	FMRP		21784246	B7Z7Y9,Q6PCT2	FBL19|JHDM1C
FBXO41	F-box protein 41	FMRP		21784246	Q8TF61	FBX41
FBXO7	F-box protein 7		Parkinson's Disease	25029497	Q9Y3I1	FBX|FBX07|FBX7|PARK15|PKPS
FEZF1	FEZ family zinc finger 1		Brain Development	20431123	A0PJY2	FEZ|ZNF312B
FEZF2	FEZ family zinc finger 2		Autism, Brain Development	19404256; 25002477	Q8TBJ5	FEZ|FEZL|TOF|ZFP312|ZNF312
FGD1	FYVE, RhoGEF and PH domain containing 1		Autism, Intellectual Disability, Aarskog-Scott syndrome , Mental retardation, X-linked syndromic 16	15020472; 22482801; 21910631; 18694825; 24770546; 11940089	P98174	AAS|FGDY|MRXS16|ZFYVE3
FLNA	filamin A, alpha		Intellectual Disability, Brain Development	15020472; 22482801; 21910631; 18694825; 24089482	Q60FE5,P21333,Q6NXF2	ABP-280|ABPX|CVD1|FLN|FLN-A|FLN1|FMD|MNS|NHBP|OPD|OPD1|OPD2|XLVD|XMVD
FMR1	fragile X mental retardation 1		Intellectual Disability, Autsim, Fragile X syndrome	15020472; 22482801; 21910631; 18694825; 9829913	G8JLE9,G8JL90,Q06787	FMRP|FRAXA|POF|POF1
FOS	FBJ murine osteosarcoma viral oncogene homolog		Alzheimer's disease	24919190	Q6FG41,P01100	AP-1|C-FOS|P55
FOXF2	forkhead box F2		Chromosome 6pter-p24 deletion syndrome	21204225	Q12947	FKHL6|FREAC-2|FREAC2
FOXG1	forkhead box G1		Intellectual Disability, Autism, Rett syndrome	15020472; 22482801; 21910631; 18694825; 18571142	P55316	BF1|BF2|FHKL3|FKH2|FKHL1|FKHL2|FKHL3|FKHL4|FOXG1A|FOXG1B|FOXG1C|HBF-1|HBF-2|HBF-3|HBF-G2|HBF2|HFK1|HFK2|HFK3|KHL2|QIN
FOXK2	forkhead box K2	FMRP		21784246	Q01167	ILF|ILF-1|ILF1
FOXO1	forkhead box O1		Brain Development	23835335	Q12778	FKH1|FKHR|FOXO1A
FOXO3	forkhead box O3	FMRP		21784246	O43524	AF6Q21|FKHRL1|FKHRL1P2|FOXO2|FOXO3A
FOXP1	forkhead box P1		Autism, Intellectual Disability, Autism, Mental retardation with language impairment	15020472; 22482801; 21910631; 18694825; 21572417	Q548T7,E9PFD3,Q8TEA2,G5E9V8,Q9H334,B3KV70,Q8N2P0	12CC4|QRF1|HFKH1B
FOXP2	forkhead box P2		Autism, Brain Development	15108192; 24453072	B7ZLK5,O15409,Q8N6B5,Q8N6B6	CAGH44|SPCH1|TNRC10
FOXP4	forkhead box P4		Brain Development	20951773	Q8IVH2	HFKHLA
FOXQ1	forkhead box Q1		Ritscher-Schinzel syndrome	15704124	Q9C009	HFH1
FRY	furry homolog (Drosophila)	FMRP		21784246	Q5TBA9	-
FUS	fused in sarcoma		Amyotrophic lateral sclerosis 6, autosomal recessive, with or without frontotemporal dementia	25083344	Q13344,P35637,Q6IBQ5	ALS6|ETM4|FUS1|HNRNPP2|POMP75|TLS
FXR1	fragile X mental retardation, autosomal homolog 1		Mental Retardation, Fragile X syndromic (ID)	7489725	P51114	FXR1P
FXR2	fragile X mental retardation, autosomal homolog 2		Mental Retardation, Fragile X syndromic (ID)	7489725	P51116	FMR1L2|FXR2P
GAS7	growth arrest-specific 7	FMRP	Brain Development	24151073	O60861	MLL/GAS7
GATAD2A	GATA zinc finger domain containing 2A		Schizophrenia	25056061	Q86YP4	P66ALPHA
GATAD2B	GATA zinc finger domain containing 2B		Mental retardation, autosomal dominant 18 (ID)	23033978	Q8WXI9	P66BETA|RP11-216N14.6
GLI2	GLI family zinc finger 2		Intellectual Disability, Holoprosencephaly	15020472; 22482801; 21910631; 18694825; 24744436	Q1PSW9,Q59FV5,P10070	HPE9|THP1|THP2
GLI3	GLI family zinc finger 3		Intellectual Disability, Greig cephalopolysyndactyly syndrome	15020472; 22482801; 21910631; 18694825; 24736735	P10071	ACLS|GCPS|GLI3-190|GLI3FL|PAP-A|PAPA|PAPA1|PAPB|PHS|PPDIV
GON4L	gon-4-like (C. elegans)		Intellectual Disability	15020472; 22482801; 21910631; 18694825	Q3T8J9,Q6PHZ4	GON-4|GON4|RP11-243J18.4|YARP
GPR123	G protein-coupled receptor 123		Brain Development	17212699	Q86SQ6	-
GSX1	GS homeobox 1		Brain Development	21205889	Q9H4S2	GSH1|GSH-1
GSX2	GS homeobox 2		Brain Development	21205889	Q9BZM3,B2LYG3	GSH2
GTF2I	general transcription factor IIi		Autism	22048961	Q499G6,P78347	BAP135|BTKAP1|DIWS|GTFII-I|IB291|SPIN|TFII-I|WBS|WBSCR6
GTF2IRD2	GTF2I repeat domain containing 2		Williams-Beuren syndrome	23118870	Q86UP8	FP630|GTF2IRD2A
GTF2IRD2B	GTF2I repeat domain containing 2B		Williams-Beuren syndrome	23118870	Q6EKJ0	-
GTF3C1	general transcription factor IIIC, polypeptide 1, alpha 220kDa	FMRP		21784246	Q12789	TFIIIC|TFIIIC220|TFIIICALPHA
GTF3C2	general transcription factor IIIC, polypeptide 2, beta 110kDa	FMRP		21784246	Q8WUA4	TFIIIC-BETA|TFIIIC110
HAX1	HCLS1 associated protein X-1		Kostmann syndrome	24482108	O00165	HCLSBP1|HS1BP1|SCN3
HCFC1	host cell factor C1 (VP16-accessory protein)	FMRP	Autism, Intellectual Disability	15020472; 22482801; 21910631; 18694825	P51610	CFF|HCF-1|HCF1|HFC1|MRX3|VCAF
HDAC1	histone deacetylase 1		Brain Development	23852118	Q13547,Q6IT96	GON-10|HD1|RPD3|RPD3L1
HDAC2	histone deacetylase 2		Brain Development	23436026	Q92769	HD2|RPD3|YAF1
HDAC3	histone deacetylase 3		Brain Development	21695276	O15379	HD3|RPD3|RPD3-2
HDAC4	histone deacetylase 4	FMRP	Autism, Schizophrenia, Brachydactyly-mental retardation syndrome, Brain Development	20691407; 20471694; 23188045; 23141539	P56524,Q86YH7	AHO3|BDMR|HA6116|HD4|HDAC-4|HDAC-A|HDACA
HDAC5	histone deacetylase 5	FMRP		21784246	Q9UQL6	HD5|NY-CO-9
HDAC6	histone deacetylase 6		Autism, Brain Development	24604703	Q9UBN7	HD6
HDAC8	histone deacetylase 8		Intellectual Disability	15020472; 22482801; 21910631; 18694825	A6ND61,A6NJR3,Q9BY41,A6ND12	CDLS5|HD8|HDACL1|MRXS6|RPD3|WTS
HES6	hairy and enhancer of split 6 (Drosophila)		Brain Development	23689134	Q96HZ4	HES-6|BHLHB41|BHLHC23
HESX1	HESX homeobox 1		Intellectual Disability	15020472; 22482801; 21910631; 18694825	Q9UBX0	ANF|CPHD5|RPX
HEYL	hairy/enhancer-of-split related with YRPW motif-like		Brain Development	21259317	Q9NQ87	HEY3|HRT3|BHLHB33
HHEX	hematopoietically expressed homeobox		Alzheimer's disease	23036584	Q03014	HEX|HMPH|HOX11L-PEN|PRH|PRHX
HIC1	hypermethylated in cancer 1		Miller-Dieker lissencephaly syndrome	10072440	Q14526,A0PJI1	ZBTB29|ZNF901|HIC-1
HIC2	hypermethylated in cancer 2		DiGeorge syndrome	19420922	Q96JB3	HRG22|ZBTB30|ZNF907
HIPK1	homeodomain interacting protein kinase 1	FMRP		21784246	B4DZ33,Q86Z02	MYAK|NBAK2
HIPK2	homeodomain interacting protein kinase 2	FMRP		21784246	Q9H2X6	PRO0593
HIPK3	homeodomain interacting protein kinase 3	FMRP		21784246	Q9H422	DYRK6|FIST3|PKY|YAK1
HIST1H2BJ	histone cluster 1, H2bj		Schizophrenia	20457675	P06899	H2B/R|H2BFR
HIVEP1	human immunodeficiency virus type I enhancer binding protein 1	FMRP		21784246	P15822	CIRIP|CRYBP1|MBP-1|PRDII-BF1|SCHNURRI-1|ZAS1|ZNF40|ZNF40A
HIVEP2	human immunodeficiency virus type I enhancer binding protein 2	FMRP		21784246	P31629	HIV-EP2|MBP-2|MIBP1|SHN2|ZAS2|ZNF40B
HIVEP3	human immunodeficiency virus type I enhancer binding protein 3	FMRP		21784246	Q5T1R4	KBP-1|KBP1|KRC|SHN3|SCHNURRI-3|ZAS3|ZNF40C
HLA-DRB1	Major Histocompatibility Complex, Class II, DR Beta 1		Autism	8765331	P01912	-
HLF	hepatic leukemia factor		Brain Development	10023025	Q16534,Q6FHS9	-
HMGB3	high mobility group box 3		Microphthalmia, syndromic 13	4998085	O15347	HMG-2A|HMG-4|HMG2A|HMG4
HMGN1	high mobility group nucleosome binding domain 1		Autism	22009741	P05114,Q6NSG7	HMG14
HMGXB3	HMG box domain containing 3	FMRP		21784246	Q12766,Q562E5	HMGX3|SMF
HMX2	H6 family homeobox 2		Brain Development	7510254	A2RU54	H6L|NKX5-2
HMX3	H6 family homeobox 3		Brain Development	7510254	A6NHT5	NKX-5.1|NKX5.1|NKX5-1
HNRNPH2	heterogeneous nuclear ribonucleoprotein H2 (H')		Autism	20479760	P55795	FTP3|HNRPH'|HNRPH2|HNRNPH'
HNRNPUL1	heterogeneous nuclear ribonucleoprotein U-like 1	FMRP		21784246	Q9BUJ2	E1B-AP5|E1BAP5|HNRPUL1
HOXA1	homeobox A1		Autism, Intellectual Disability, Autism, Bosley-Salih-Alorainy syndrome	15020472; 22482801; 21910631; 18694825; 22950449	P49639	BSAS|HOX1|HOX1F
HOXB1	homeobox B1		Autism	11091361	P14653	HCFP3|HOX2|HOX2I|HOX-2.9
HOXD1	homeobox D1		Chromosome 2q32-q33 deletion syndrome	17352388	Q9GZZ0,Q96CA4	HOX4|HOX4G|HOX-4.7
HOXD10	homeobox D10		Brain Development	14743444	P28358	HOX4|HOX4D|HOX4E|HOX-4.4
HOXD11	homeobox D11		Autism	19540081	P31277	HOX4|HOX4F
HOXD12	homeobox D12		Autism	19540081	P35452	HOX4H
HOXD13	homeobox D13		Autism	19540081	P35453	BDE|BDSD|HOX4I|SPD
HOXD3	homeobox D3		Brain Development	9441667	P31249	HOX1D|HOX4|HOX4A|HOX-4.1
HOXD4	homeobox D4		Brain Development	17010333	P09016	HHO.C13|HOX-5.1|HOX4|HOX4B|HOX-4.2
HOXD9	homeobox D9		Brain Development	19585150	P28356	HOX4|HOX4C|HOX-4.3|HOX-5.2
HTT	huntingtin	FMRP	Huntington Disease	8401587	P42858	HD|IT15
IFNG	interferon, gamma		Schizophrenia	20821074	P01579	-
IKBKG	inhibitor of kappa light polypeptide gene enhancer in B-cells, kinase gamma		Intellectual Disability	15020472; 22482801; 21910631; 18694825	Q9Y6K9	AMCBX1|FIP-3|FIP3|FIP3P|IKK-GAMMA|IP|IP1|IP2|IPD2|NEMO
IL16	Interleukin 16		Autism	25549968	Q9UME6,Q14005	LCF|NIL16|PRIL16|PRIL-16
IL2	Interleukin 2		Schizophrenia	25056061	P60568	-
IL4	Interleukin 4		Schizophrenia	25056061	P05112	-
IL6	interleukin 6 (interferon, beta 2)		Alzheimer's disease	20393813	P05231	-
IRX5	iroquois homeobox 5		Hamamy syndrome	17230486	P78411	HMMS|IRX-2A|IRXB2
JARID1C	lysine (K)-specific demethylase 5C		Mental retardation, X-linked (ID)	17320160	P41229	KDM5C
JARID2	jumonji, AT rich interactive domain 2		Autism	19812673	Q92833	JMJ
JMJD1C	jumonji domain containing 1C		Autism	17290275	Q15652	RP11-10C13.2|TRIP8
KAT6B	K(lysine) acetyltransferase 6B		SBBYSS syndrome	24458743	B2RWN8,Q8WYB5	GTPTS|MORF|MOZ2|MYST4|QKF|QUERKOPF
KAT8	K(lysine) acetyltransferase 8		Koolen-De Vries syndrome	22544367	Q9H7Z6	MOF|MYST1|HMOF
KCNH1	potassium voltage-gated channel, subfamily H (eag-related), member 1	FMRP		21784246	O95259	-
KCNH2	potassium voltage-gated channel, subfamily H (eag-related), member 2		Schizophrenia	19412172	Q12809	-
KCNH3	potassium voltage-gated channel, subfamily H (eag-related), member 3	FMRP		21784246	Q9ULD8	-
KCNH7	potassium voltage-gated channel, subfamily H (eag-related), member 7	FMRP		21784246	Q9NS40	-
KCNIP1	Kv channel interacting protein 1		Brain Development	21129448	Q3YAD3,Q9NZI2,Q3YAD1	KCHIP1|VABP
KDM1A	lysine (K)-specific demethylase 1A		Brain Development	24735673	O60341	AOF2|BHC110|KDM1|LSD1
KDM3B	Lysine (K)-specific demethylase 3B		Schizophrenia	25056061	Q7LBC6	5QNCA|C5ORF7|JMJD1B|NET22
KDM4A	Lysine (K)-specific demethylase 4A		Schizophrenia	25056061	O75164	JHDM3A|JMJD2|JMJD2A
KDM4B	lysine (K)-specific demethylase 4B	FMRP		21784246	O94953	JMJD2B
KDM5B	lysine (K)-specific demethylase 5B		Autism	25363760	Q9UFD3,Q9UGL1	CT31|JARID1B|PLU-1|PLU1|PUT1|RBBP2H1A
KDM5C	lysine (K)-specific demethylase 5C	FMRP	Autism, Intellectual Disability	15020472; 22482801; 21910631; 18694825	P41229	DXS1272E|JARID1C|MRXJ|MRXSCJ|MRXSJ|SMCX|XE169
KHDRBS1	KH domain containing, RNA binding, signal transduction associated 1		Brain Development	22196734	Q07666	SAM68|P62|P68
KHDRBS2	KH domain containing, RNA binding, signal transduction associated 2		Autism	22016809	Q5VWX1	SLM-1|SLM1|BA535F17.1
KIAA2018	KIAA2018	FMRP		21784246	Q68DE3	-
KLF13	Kruppel-like factor 13		Chromosome 15q13.3 deletion syndrome	21596161	Q9Y2Y9	BTEB3|FKLF2|NSLP1|RFLAT-1|RFLAT1
KLF5	Kruppel-like factor 5 (intestinal)		Alzheimer's disease, Schizophrenia	19141999; 18226501	Q5T6X2,Q13887	BTEB2|CKLF|IKLF
KLF6	Kruppel-like factor 6		Schizophrenia	17387318	D3GC14,F5H3M5,Q99612	BCD1|CBA1|COPEB|CPBP|GBF|PAC1|ST12|ZF9
KLF7	Kruppel-like factor 7 (ubiquitous)		Brain Development	20580711	B7Z4F7,Q96E51,O75840,Q7Z3H8	UKLF
KLF8	Kruppel-like factor 8		Intellectual Disability	15020472; 22482801; 21910631; 18694825	B4DJN3,E7EQQ8,O95600	BKLF3|ZNF741
L3MBTL2	L(3)Mbt-Like 2		Schizophrenia	25056061	Q969R5	H-L(3)MBT-L|L3MBT
LARP7	La ribonucleoprotein domain family, member 7		Intellectual Disability, Alazami syndrome	15020472; 22482801; 21910631; 18694825	Q4G0J3	PIP7S
LAS1L	LAS1-like (S. cerevisiae)		Intellectual Disability	15020472; 22482801; 21910631; 18694825	Q9Y4W2	LAS1-LIKE|DJ475B7.2
LBX1	ladybird homeobox 1		Brain Development	23284619	P52954	HPX-6|HPX6|LBX1H|HOMEOBOX
LBX2	ladybird homeobox 2		Brain Development	10473138	Q6XYB7	-
LHX1	LIM homeobox 1		Chromosome 17q12 deletion syndrome	18039948	P48742,Q58F18	LIM-1|LIM1
LHX2	LIM homeobox 2		Brain Development	24262147	B3KNJ5,P50458	LH2|HLHX2
LHX3	LIM homeobox 3		Pituitary hormone deficiency, combined, 3	23288907	F1T0D9,F1T0D5,Q9UBR4	CPHD3|LIM3|M2-LHX3
LHX4	LIM homeobox 4		Pituitary hormone deficiency, combined, 3	23288907	Q969G2	CPHD4
LHX6	LIM homeobox 6		Brain Development	24742460	H0YN76,Q9UPM6	LHX6.1
LHX8	LIM homeobox 8		Brain Development	24265310	Q68G74,E9PGE3	LHX7
LHX9	LIM homeobox 9		Brain Development	24647753	Q9NQ69	-
LMX1A	LIM homeobox transcription factor 1, alpha		Schizophrenia, Brain Development	20570600; 24066094	Q8TE12	LMX1|LMX1.1
LMX1B	LIM homeobox transcription factor 1, beta		Autism, Schizophrenia	21901133; 20570600	F8VYP0,F8W7W6,O60663,Q6ISE0,B7ZLH2	LMX1.2|NPS1
LRPPRC	leucine-rich pentatricopeptide repeat containing		Autism, Leigh syndrome, Intellectual Disability	12529507	E5KNY5,P42704	CLONE-23970|GP130|LRP130|LSFC
LZTR1	Leucine-zipper-like transcription regulator 1		Autism	25961944	Q8N653	LZTR-1
MACF1	microtubule-actin crosslinking factor 1	FMRP		21784246	Q9UPN3,Q6ZSD7	ABP620|ACF7|MACF|OFC4
MAFB	v-maf musculoaponeurotic fibrosarcoma oncogene homolog B (avian)		Multicentric carpotarsal osteolysis syndrome	23670161	Q9Y5Q3	KRML|MCTO
MAFK	v-maf musculoaponeurotic fibrosarcoma oncogene homolog K (avian)		Brain Development	12388604	O60675,A4D214	NFE2U|P18
MAGED1	melanoma antigen family D, 1	FMRP	Autism, Brain Development	23314527	Q9Y5V3	-
MAPK1	mitogen-activated protein kinase 1	FMRP	Autism	21784246	Q1HBJ4,Q499G7,P28482	ERK|ERK2|ERT1|MAPK2|P42MAPK|PRKM1|PRKM2|P38|P40|P41|P41MAPK
MAPK14	mitogen-activated protein kinase 14		Schizophrenia	22850347	Q16539	CSBP|CSBP1|CSBP2|CSPB1|EXIP|MXI2|PRKM14|PRKM15|RK|SAPK2A|P38|P38ALPHA
MAPK8IP1	mitogen-activated protein kinase 8 interacting protein 1	FMRP		21784246	Q9UQF2,Q6NUQ9	IB1|JIP-1|JIP1|PRKM8IP
MAZ	MYC-associated zinc finger protein (purine-binding transcription factor)	FMRP		21784246	Q8IUI2,P56270	PUR1|PUR-1|SAF-1|SAF-2|SAF-3|ZF87|ZNF801|ZIF87
MBD1	methyl-CpG binding domain protein 1		Autism	15967618	K7EQZ4,K7ELI2,K7ESN0,Q9UIS9,B4DI41,B4DUR3,A8K654	CXXC3|PCM1|RFT
MBD2	methyl-CpG binding domain protein 2		Rett syndrome	23688924	Q9UBB5	DMTASE|NY-CO-41
MBD3	methyl-CpG binding domain protein 3		Autism	19921286	O95983	-
MBD4	methyl-CpG binding domain protein 4		Autism	19921286	O95243	MED1
MBD5	methyl-CpG binding domain protein 5	FMRP	Autism	21784246	Q9P267	-
MBD6	methyl-CpG binding domain protein 6		Autism	23055267	Q6P0P0,Q96DN6	-
MBNL1	muscleblind-like splicing regulator 1		Myotonic dystrophy 1	24354850	Q9NR56	EXP|EXP35|EXP40|EXP42|MBNL
MBNL2	muscleblind-like splicing regulator 2		Myotonic dystrophy 1	24440524	Q5VZF2,A2A3S3	MBLL|MBLL39|PRO2032
MBNL3	muscleblind-like splicing regulator 3		Myotonic dystrophy 1	19095965	Q9NUK0	CHCR|MBLX|MBLX39|MBXL
MECP2	methyl CpG binding protein 2 (Rett syndrome)		Intellectual Disability, Autism, Rett syndrome	15020472; 22482801; 21910631; 18694825; 10508514	Q59FJ6,D3YJ43,P51608	AUTSX3|MRX16|MRX79|MRXS13|MRXSL|PPMX|RS|RTS|RTT
MED12	mediator complex subunit 12		Intellectual Disability, Lujan-Fryns syndrome, Ohdo syndrome, Opitz-Kaveggia syndrome, Autism	15020472; 22482801; 21910631; 18694825; 24123922	Q93074	ARC240|CAGH45|FGS1|HOPA|MED12S|OKS|OPA1|TNRC11|TRAP230
MED13	mediator complex subunit 13	FMRP		21784246	Q9UHV7	ARC250|DRIP250|HSPC221|THRAP1|TRAP240
MED13L	mediator complex subunit 13-like	FMRP		21784246	Q71F56	PROSIT240|THRAP2|TRAP240L
MED14	mediator complex subunit 14	FMRP		21784246	O60244	CRSP150|CRSP2|CSRP|CXORF4|DRIP150|EXLM1|RGR1|TRAP170
MED15	mediator complex subunit 15		Schizophrenia	25056061	Q96RN5	ARC105|CAG7A|CTG7A|PCQAP|TIG-1|TIG1|TNRC7
MED16	mediator complex subunit 16	FMRP		21784246	Q9Y2X0	DRIP92|THRAP5|TRAP95
MED17	mediator complex subunit 17		Microcephaly, postnatal progressive, with seizures and brain atrophy	20950787	Q9NVC6	CRSP6|CRSP77|DRIP80|TRAP80
MED19	mediator complex subunit 19		Schizophrenia	25056061	A0JLT2	-
MED23	mediator complex subunit 23		Mental retardation, autosomal recessive 18 (ID)	21868677	Q05DL5,Q9ULK4	ARC130|CRSP130|CRSP133|CRSP3|DRIP130|MRT18|SUR-2|SUR2
MEF2A	myocyte enhancer factor 2A		Brain Development, Alzheimer's disease	23486945; 17112666	Q7Z6C9,Q02078,F6XG23	ADCAD1|RSRFC4|RSRFC9|MEF2
MEF2C	myocyte enhancer factor 2C		Autism, Chromosome 5q14.3 deletion syndrome, Mental retardation (ID), stereotypic movements, epilepsy, and/or cerebral malformations	20412115; 23824879; 24306141	F8W7V7,D8L7E9,Q06413,C9JMZ0	C5DELQ14.3|DEL5Q14.3
MEF2D	myocyte enhancer factor 2D	FMRP	Brain Development, Parkinson's disease	24990518; 24848448	Q14814	-
MEFV	Mediterranean fever		Alzheimer's disease	17090974	D2DTW2,O15553	FMF|MEF|TRIM20
MEIS2	Meis homeobox 2		Brain Development	22390724	B3KPD8,B7Z6F6,O14770	HST18361|MRG1
MEOX2	mesenchyme homeobox 2		Alzheimer's disease	16116430	P50222	GAX|MOX2
MET	met proto-oncogene (hepatocyte growth factor receptor)		Autism	17053076	P08581	AUTS9|HGFR|RCCP2|C-MET
MID1	midline 1 (Opitz/BBB syndrome)		Intellectual Disability, Opitz GBBB syndrome, type I	15020472; 22482801; 21910631; 18694825; 24374473	O15344	BBBG1|FXY|GBBB1|MIDIN|OGS1|OS|OSX|RNF59|TRIM18|XPRF|ZNFXY
MID2	midline 2		Intellectual Disability	15020472; 22482801; 21910631; 18694825	Q6GX22,Q9UJV3	FXY2|RNF60|TRIM1
MINK1	misshapen-like kinase 1	FMRP		21784246	Q8N4C8	B55|MAP4K6|MINK|YSK2|ZC3|HMINK|HMINKBETA
MITF	microphthalmia-associated transcription factor		Autism	15446388	B4DNC7,Q8WYR3,E9PFN0,O75030,B4DJL2	CMM8|MI|WS2|WS2A|BHLHE32
MKL2	MKL/myocardin-like 2	FMRP	Autism	20442744	Q9ULH7	MRTF-B|NPD001
MLL	myeloid/lymphoid or mixed-lineage leukemia (trithorax homolog, Drosophila)	FMRP	Brain Development	19212323	E9PQG7,Q03164	ALL-1|CXXC7|HRX|HTRX1|KMT2A|MLL/GAS7|MLL1A|TET1-MLL|TRX1|WDSTS
MLL2	myeloid/lymphoid or mixed-lineage leukemia 2	FMRP	Kabuki syndrome 1	22126750	Q6PIA1,Q59FG6,O14686	AAD10|ALR|CAGL114|KABUK1|KMS|KMT2D|MLL4|TNRC21
MLL3	myeloid/lymphoid or mixed-lineage leukemia 3	FMRP		21784246	Q8NEZ4	HALR|KMT2C
MLLT3	myeloid/lymphoid or mixed-lineage leukemia (trithorax homolog, Drosophila); translocated to, 3		Brain Development	20348416	Q6MZE2,Q8IVB0,P42568	AF9|YEATS3
MNT	MNT, MAX dimerization protein		Miller-Dieker lissencephaly syndrome	9199935	Q99583	MAD6|MXD6|ROX|BHLHD3
MPRIP	myosin phosphatase Rho interacting protein	FMRP		21784246	Q6WCQ1,Q8N236	M-RIP|MRIP|RHOIP3|RIP3|P116RIP
MTF1	metal-regulatory transcription factor 1		Autism	15446388	Q14872	MTF-1|ZRF
MYCBP2	MYC binding protein 2, E3 ubiquitin protein ligase	FMRP		21784246	O75592,J3KPZ3	PAM
MYCN	v-myc myelocytomatosis viral related oncogene, neuroblastoma derived (avian)		Intellectual Disability, Feingold syndrome	15020472; 22482801; 21910631; 18694825; 22842076	P04198,Q53XS5	MODED|N-MYC|NMYC|ODED|BHLHE37
MYRF	myelin regulatory factor		Brain Development	24275321	Q9Y2G1	C11ORF9|MRF|NDT80|PQN-47
MYT1L	myelin transcription factor 1-like	FMRP	Autism, Intellectual Disability	15020472; 22482801; 21910631; 18694825	Q49A74,Q9UL68	NZF1
NAA15	N(alpha)-acetyltransferase 15, NatA auxiliary subunit		Autism	25363768	Q58F05,Q9BXJ9	GA19|NARG1|NATH|TBDN100
NAB2	NGFI-A binding protein 2 (EGR1 binding protein 2)		Schizophrenia	25056061	Q15742	MADER
NAP1L2	nucleosome assembly protein 1-like 2		Brain Development	10932189	Q9ULW6	BPX
NCALD	neurocalcin delta		Brain Development	11267673	P61601,B2RB70	-
NCOA1	nuclear receptor coactivator 1	FMRP		21784246	Q15788	F-SRC-1|KAT13A|RIP160|SRC1|BHLHE42|BHLHE74
NCOA2	nuclear receptor coactivator 2	FMRP		21784246	Q15596	GRIP1|KAT13C|NCOA-2|SRC2|TIF2|BHLHE75
NCOA6	nuclear receptor coactivator 6	FMRP		21784246	Q14686,F6M2K2	AIB3|ASC2|NRC|PRIP|RAP250|TRBP
NCOR1	nuclear receptor corepressor 1	FMRP		21784246	E9PGV6,Q6PGR4,O75376,Q86YY0	N-COR|N-COR1|TRAC1|HN-COR
NCOR2	nuclear receptor corepressor 2	FMRP		21784246	C9JFD3,C9JE98,Q9Y618,C9J0Q5	CTG26|N-COR2|SMAP270|SMRT|SMRTE|SMRTE-TAU|TNRC14|TRAC|TRAC-1|TRAC1
NCS1	neuronal calcium sensor 1	FMRP	Brain Development	11910115	P62166,E9PAY3	FLUP|FREQ
NDN	necdin, melanoma antigen (MAGE) family member		Prader-Willi syndrome	24039599	Q99608	HST16328|PWCR
NDNL2	necdin-like 2		Autism	11782285	Q96MG7	HCA4|MAGEG1|MAGEL3|NSE3|NSMCE3
NDUFA13	NADH dehydrogenase (ubiquinone) 1 alpha subcomplex, 13		Schizophrenia	25056061	Q9P0J0	B16.6|CDA016|GRIM-19|GRIM19
NEUROD1	neuronal differentiation 1		Brain Development	24913893	Q13562	BETA2|BHF-1|MODY6|NEUROD|BHLHA3
NEUROD2	neuronal differentiation 2		Brain Development	23303943	Q15784	NDRF|BHLHA1
NEUROD4	neuronal differentiation 4		Brain Development	12797958	Q8IW56,Q9HD90	ATH-3|ATH3|ATOH3|MATH-3|BHLHA4
NEUROD6	neuronal differentiation 6		Brain Development	23303943	Q96NK8	ATOH2|MATH2|MATH-2|NEX1M|NEX1|BHLHA2
NEUROG1	neurogenin 1		Brain Development	9539122	Q92886,F1T0H3	AKA|MATH4C|NEUROD3|BHLHA6|NGN1
NEUROG2	neurogenin 2		Brain Development	10398684	Q9H2A3	ATOH4|MATH4A|NGN2|BHLHA8|NGN-2
NEUROG3	neurogenin 3		Brain Development	9000438	Q9Y4Z2	ATOH5|MATH4B|NGN-3|BHLHA7|NGN3
NFATC3	nuclear factor of activated T-cells, cytoplasmic, calcineurin-dependent 3		Brain Development	19179536	Q12968,B5B2S0,B5B2S1	NFAT4|NFATX
NFATC4	nuclear factor of activated T-cells, cytoplasmic, calcineurin-dependent 4		Brain Development	19179536	Q14934	NF-ATC4|NFAT3
NFIA	nuclear factor I/A		Autism	22031302	B4DRJ3,F5H0R0,F8W8W3,Q12857,B4DS53	CTF|NF-I/A|NF1-A|NFI-A|NFI-L
NFIB	nuclear factor I/B		Brain Development	24553933	Q5VW28,O00712	CTF|HMGIC/NFIB|NF-I/B|NF1-B|NFI-B|NFI-RED|NFIB2|NFIB3
NFIC	nuclear factor I/C (CCAAT-binding transcription factor)	FMRP		21784246	K7EMU1,P08651,B7Z4T6	CTF|CTF5|NF-I|NFI
NFIX	nuclear factor I/X (CCAAT-binding transcription factor)	FMRP	Marshall-Smith syndrome, Sotos syndrome	25118028; 20673863	B4DHW2,Q14938	MRSHSS|NF1A|SOTOS2
NFKB1	nuclear factor of kappa light polypeptide gene enhancer in B-cells 1		Brain Development	12947408	P19838	EBP-1|KBF1|NF-KB1|NF-KAPPA-B|NF-KAPPAB|NFKB-P105|NFKB-P50|NFKAPPAB|P105|P50
NKX2-1	NK2 homeobox 1		Intellectual Disability, Brain Development	15020472; 22482801; 21910631; 18694825; 25116795	P43699	BCH|BHC|NK-2|NKX2.1|NKX2A|TEBP|TITF1|TTF-1|TTF1
NKX2-2	NK2 homeobox 2		Brain Development	12897786	O95096	NKX2.2|NKX2B
NOP2	NOP2 nucleolar protein		Mental retardation, autosomal recessive 5 (ID)	22541559	P46087	NOL1|NOP120|NSUN1|P120
NOTCH4	notch 4		Schizophrenia	22641179	Q99466	INT3|NOTCH3
NPAS2	neuronal PAS domain protein 2	FMRP	Autism, Circadian rythm, Schizophrenia, Bipolar disorder	17264841; 23211520; 24824748; 24389266	Q99743,A2I2P5	MOP4|PASD4|BHLHE9
NPAS3	neuronal PAS domain protein 3		Schizophrenia, Brain Development	24674381; 21709683	Q8IXF0	MOP6|PASD6|BHLHE12
NPAS4	neuronal PAS domain protein 4		Brain Development	24887558	Q8IUM7	LE-PAS|NXF|PASD10|BHLHE79
NR1D1	nuclear receptor subfamily 1, group D, member 1		Circadian rythm, Bipolar disorder	24842045; 24765068	F1D8S3,P20393	EAR1|THRA1|THRAL|EAR-1|HREV
NR1D2	nuclear receptor subfamily 1, group D, member 2		Circadian rythm	24813609	B4DXD3,Q14995,F1D8P2	BD73|EAR-1R|RVR
NR2E1	nuclear receptor subfamily 2, group E, member 1		Brain Development	16289828	Q9Y466,B6ZGT9	TLL|TLX|XTLL
NR2F1	nuclear receptor subfamily 2, group F, member 1	FMRP		21784246	P10589	COUP-TFI|EAR-3|EAR3|ERBAL3|NR2F2|SVP44|TCFCOUP1|TFCOUP1
NR2F2	nuclear receptor subfamily 2, group F, member 2		Brain Development	22178710	F1D8R0,P24468	ARP1|COUPTFB|COUPTFII|NF-E3|NR2F1|SVP40|TFCOUP2
NR3C1	nuclear receptor subfamily 3, group C, member 1 (glucocorticoid receptor)		Brain Development	15280545	E5KQF6,E5KQF5,F1D8N4,P04150	GCCR|GCR|GR|GRL
NR3C2	nuclear receptor subfamily 3, group C, member 2		Autism	25363760	B0ZBF5,Q2NKL1,P08235,B0ZBF6	MCR|MLR|MR|NR3C2VIT
NR4A2	nuclear receptor subfamily 4, group A, member 2		Brain Development	19345186	Q53EL4,P43354,F1D8N6	HZF-3|NOT|NURR1|RNR1|TINUR
NR4A3	nuclear receptor subfamily 4, group A, member 3		Brain Development	8717368	Q92570	CHN|CSMF|MINOR|NOR1|TEC
NRG1	neuregulin 1		Schizophrenia, Brain Development	19652122; 25052836	Q7RTW3,A6MW56,B0FYA8,B0FWZ3,B0FYA9,A6MW55,Q02297,B0FYA7,Q7RTW5,Q6PK61,B7Z1D7,E9PHH4,B7Z4Z3	ARIA|GGF|GGF2|HGL|HRG|HRG1|HRGA|MST131|NDF|SMDF
NRIP1	nuclear receptor interacting protein 1	FMRP		21784246	P48552,A8K171	RIP140
NSD1	nuclear receptor binding SET domain protein 1	FMRP	Autism, Intellectual Disability, Sotos syndrome	15020472; 22482801; 21910631; 18694825; 25118028	Q96MN8,Q96L73	ARA267|KMT3B|SOTOS|SOTOS1|STO
NUFIP1	nuclear fragile X mental retardation protein interacting protein 1		Brain Development	12941608	Q9UHK0	NUFIP|BA540M5.1
OLIG1	oligodendrocyte transcription factor 1		Brain Development	11955447	Q8TAK6	BHLHB6|BHLHE21
OLIG2	oligodendrocyte lineage transcription factor 2		Brain Development	11955447	Q13516	BHLHB1|OLIGO2|PRKCBP2|RACK17|BHLHE19
OLIG3	oligodendrocyte transcription factor 3		Brain Development	15769945	Q7RTU3	BHLHB7|BHLHE20
OTUD7B	OTU domain containing 7B		Schizophrenia	25056061	Q6GQQ9	CEZANNE|ZA20D1
OTX1	orthodenticle homeobox 1		Autism	21750575	P32242	-
OTX2	orthodenticle homeobox 2		Microphthalmia, syndromic 5	24498598	F1T0D0,P32243,F1T0C9,F1T0D1	CPHD6|MCOPS5
PARP1	poly (ADP-ribose) polymerase 1		Intellectual Disability, Alzheimer's disease	15020472; 22482801; 21910631; 18694825; 24121118	P09874	ADPRT|ADPRT 1|ADPRT1|ARTD1|PARP|PARP-1|PPOL|PADPRT-1
PAWR	PRKC, apoptosis, WT1, regulator		Schizophrenia	18281137	Q96IZ0	PAR4|PAR-4
PAX1	paired box 1		Otofaciocervical syndrome 2	23851939	P15863	HUP48
PAX2	paired box 2		Brain Development	25050931	Q02962	PAPRS
PAX3	paired box 3		Brain Development	19123128	P23760	CDHS|HUP2|WS1|WS3
PAX5	paired box 5		Brain Development	23349049	Q02548	BSAP
PAX6	paired box 6		Brain Development	25117830	F1T0F8,P26367,Q66SS1	AN|AN2|D11S812E|MGDA|WAGR
PAX7	paired box 7		Brain Development	16688176	Q2PJS5,P23759,E9PFV9	HUP1|PAX7B|RMS2
PAX8	paired box 8		Intellectual Disability	15020472; 22482801; 21910631; 18694825	Q06710	-
PAXIP1	PAX interacting (with transcription-activation domain) protein 1		Alzheimer's disease	16175510	Q6ZW49	CAGF29|PACIP1|PAXIP1L|PTIP|TNRC2
PBRM1	polybromo 1		Schizophrenia	25056061	Q86U86	BAF180|PB1
PBX1	pre-B-cell leukemia homeobox 1		Brain Development	24814534	P40424,A8K5V0,Q53YC7	-
PBX4	pre-B-cell leukemia homeobox 4		Schizophrenia	25056061	Q9BYU1	-
PCGF6	polycomb group ring finger 6		Schizophrenia	25056061	Q9BYE7	MBLR|RNF134
PCNA	proliferating cell nuclear antigen		Ataxia-telangiectasia-like disorder	24911150	P12004	-
PDCD11	programmed cell death 11		Schizophrenia	25056061	Q14690	ALG-4|ALG4|NFBP|RRP5
PDE8B	phosphodiesterase 8B	FMRP		21784246	O95263	-
PDLIM5	PDZ and LIM domain 5		Bipolar disorder	24064681	B7Z481,Q96HC4,B7Z8X5	ENH|ENH1|LIM
PDS5B	PDS5, regulator of cohesion maintenance, homolog B (S. cerevisiae)	FMRP		21784246	Q9NTI5	APRIN|AS3|CG008
PEG3	paternally expressed 3	FMRP		21784246	B4DIM4,Q96Q96,Q9GZU2,A7E2B8	PW1|ZNF904|ZSCAN24
PER1	period circadian clock 1	FMRP	Autism, Brain Development, Circadian rythm	17264841; 24842045; 18419282	O15534	PER|RIGUI|HPER
PER2	period circadian clock 2		Circadian rythm	24842045	O15055	FASPS
PER3	period circadian clock 3		Circadian rythm	24982860	A2I2N5,P56645	GIG13
PEX14	peroxisomal biogenesis factor 14		Zellweger Syndrome	20301621	O75381	NAPP2|PBD13A|PEX14P|DJ734G22.2
PHC1	polyhomeotic homolog 1 (Drosophila)		Brain Development, Microcephaly	23418308	Q6GMQ3,Q6N083,P78364	EDR1|HPH1|RAE28
PHF12	PHD finger protein 12	FMRP		21784246	Q96QT6	PF1
PHF2	PHD finger protein 2		Autism	25363760	O75151	CENP-35|GRC5|JHDM1E
PHF20	PHD finger protein 20	FMRP		21784246	Q9BVI0	C20ORF104|GLEA2|HCA58|NZF|TZP
PHF6	PHD finger protein 6		Borjeson-Forssman-Lehmann syndrome	25099957	Q8IWS0,A8K230	BFLS|BORJ|CENP-31
PHF8	PHD finger protein 8		Autism, Intellectual Disability, Mental retardation syndrome, X-linked, Siderius type	15020472; 22482801; 21910631; 18694825; 20548336	Q9UPP1,O95327	JHDM1F|MRXSSD|ZNF422
PHOX2B	paired-like homeobox 2b		Central hypoventilation syndrome, congenital, with or without Hirschsprung disease	12640453	Q99453	NBLST2|NBPHOX|PMX2B
PHRF1	PHD and ring finger domains 1		Autism	25363760	Q9P1Y6	RNF221
PICALM	phosphatidylinositol binding clathrin assembly protein		Alzheimer's disease	25022885	Q13492	CALM|CLTH|LAP
PIKFYVE	phosphoinositide kinase, FYVE finger containing	FMRP		21784246	Q9Y2I7	CFD|FAB1|PIP5K|PIP5K3|ZFYVE29
PITX1	paired-like homeodomain 1		Autism	18053270	P78337	BFT|CCF|POTX|PTX1
PITX3	paired-like homeodomain 3		Schizophrenia, Brain Development	20570600; 23694789	O75364	CTPP4|PTX3
PKN1	protein kinase N1		Brain Development	18519042	Q16512	DBK|PAK-1|PAK1|PKN|PKN-ALPHA|PRK1|PRKCL1
PLXNA1	plexin A1	FMRP	Brain Development	18804103	Q9UIW2	NOV|NOVP|PLEXIN-A1|PLXN1
PLXNA2	plexin A2	FMRP	Brain Development, Schizophrenia	20484647; 16402134	O75051	OCT|PLXN2
PLXNA3	plexin A3		Brain Development	18804103	P51805	6.3|HSSEXGENE|PLEXIN-A3|PLXN3|PLXN4|SEX|XAP-6
PLXNB1	plexin B1	FMRP	Brain Development	19788569	O43157	PLEXIN-B1|PLXN5|SEP
PLXNB2	plexin B2		Brain Development	23175841	O15031	MM1|NBLA00445|PLEXB2|DJ402G11.3
PLXNB3	plexin B3		Brain Development	15147296	Q9ULL4,A8K920	PLEXB3|PLEXR|PLXN6
PLXND1	plexin D1	FMRP		21784246	Q9Y4D7	PLEXD1
POGZ	pogo transposable element with ZNF domain		Autism	22495311	B7ZBY5,E9PM80,Q7Z3K3,B4DYL9,B4DTP8	SUHW5|ZNF280E|ZNF635|ZNF635M
POLR2A	polymerase (RNA) II (DNA directed) polypeptide A, 220kDa	FMRP		21784246	P24928	POLR2|POLRA|RPB1|RPBH1|RPO2|RPOL2|RPIILS|HRPB220|HSRPB1
POLR3B	polymerase (RNA) III (DNA directed) polypeptide B		Intellectual Disability	15020472; 22482801; 21910631; 18694825	Q7Z3R8,Q9NW08	C128|HLD8|RPC2
POU1F1	POU class 1 homeobox 1		Intellectual Disability	15020472; 22482801; 21910631; 18694825	P28069	CPHD1|GHF-1|PIT1|POU1F1A|PIT-1
POU3F1	POU class 3 homeobox 1		Brain Development	24929964	Q03052	OCT6|OTF6|SCIP
POU3F2	POU class 3 homeobox 2		Brain Development	17141158	P20265	BRN2|N-OCT3|OCT7|OTF-7|OTF7|POUF3|BRN-2|OCT-7
POU3F3	POU class 3 homeobox 3		Brain Development	17141158	P20264	BRN1|OTF8
POU3F4	POU class 3 homeobox 4		Brain Development	20524937	P49335	BRAIN-4|BRN4|DFN3|DFNX2|OTF-9|OTF9|BRN-4|OCT-9
POU4F1	POU class 4 homeobox 1		Brain Development	24736625	Q01851	BRN3A|OCT-T1|RDC-1|BRN-3A
POU4F3	POU class 4 homeobox 3		Brain Development	7623109	Q15319	BRN3C|DFNA15
PPARD	peroxisome proliferator-activated receptor delta		Schizophrenia, Brain Development	18797401; 23105114	E9PE18,B4E3V3,F1D8S7,Q03181	FAAR|NR1C2|NUC1|NUCI|NUCII|PPARB
PPARG	peroxisome proliferator-activated receptor gamma		Schizophrenia, Alzheimer's disease	24843374; 24623782	D2KUA6,P37231	CIMT1|GLM1|NR1C3|PPARG1|PPARG2|PPARGAMMA
PPARGC1A	peroxisome proliferator-activated receptor gamma, coactivator 1 alpha	FMRP		21784246	Q9UBK2	LEM6|PGC-1(ALPHA)|PGC-1V|PGC1|PGC1A|PPARGC1
PPP2R1A	protein phosphatase 2, regulatory subunit A, alpha	FMRP		21784246	P30153,A8K7B7	PP2A-AALPHA|PP2AAALPHA|PR65A
PQBP1	polyglutamine binding protein 1		Intellectual Disability, Renpenning syndrome	15020472; 22482801; 21910631; 18694825; 21204222	O60828	MRX55|MRXS3|MRXS8|NPW38|RENS1|SHS
PREX1	phosphatidylinositol-3,4,5-trisphosphate-dependent Rac exchange factor 1	FMRP		21784246	Q8TCU6	P-REX1
PREX2	phosphatidylinositol-3,4,5-trisphosphate-dependent Rac exchange factor 2	FMRP		21784246	Q70Z35	6230420N16RIK|DEP.2|DEPDC2|P-REX2
PRR12	proline rich 12	FMRP		21784246	Q9ULL5	KIAA1205
PRRX1	paired related homeobox 1		Holoprosencephaly-Agnathia	22198066	P54821	AGOTC|PHOX1|PMX1|PRX-1|PRX1
PTCH1	patched 1	FMRP	Holoprosencephaly, Intellectual Disability	24244464	Q59FG5,Q13635	BCNS|HPE7|NBCCS|PTC|PTC1|PTCH|PTCH11
PTCHD1	patched domain containing 1		Autism, Intellectual Disability	15020472; 22482801; 21910631; 18694825	Q96NR3	-
PTEN	phosphatase and tensin homolog	FMRP	Intellectual Disability, Autism, Cowden syndrome	15020472; 22482801; 21910631; 18694825	P60484,F6KD01	10Q23DEL|BZS|DEC|GLM2|MHAM|MMAC1|PTEN1|TEP1
PTGER3	prostaglandin E receptor 3 (subtype EP3)		Autism	23632794	O00325,B1AK19,P43115	EP3|EP3-I|EP3-II|EP3-III|EP3-IV|EP3E|PGE2-R
PURA	purine-rich element binding protein A		Brain Development	22010047	Q00577	PUR-ALPHA|PUR1|PURALPHA
RAB18	RAB18, member RAS oncogene family		Warburg micro syndrome 3	21473985	Q9NP72	-
RAD21	RAD21 homolog (S. pombe)		Cornelia de Lange syndrome 4	22633399	O60216	CDLS4|HR21|HRAD21|MCD1|NXP1|SCC1|HHR21
RAI1	retinoic acid induced 1		Intellectual Disability, Autism, Smith-Magnis syndrome	15020472; 22482801; 21910631; 18694825; 12652298	Q7Z5J4	SMCR|SMS
RAPGEF4	Rap guanine nucleotide exchange factor (GEF) 4	FMRP	Autism	14593429	Q8WZA2	CAMP-GEFII|CGEF2|EPAC2|NBLA00496
RARB	retinoic acid receptor, beta		Brain Development	9452386	P10826,Q5QHG3,F1D8S6	HAP|NR1B2|RRB2
RAX	retina and anterior neural fold homeobox		Brain Development	22524605	Q9Y2V3	MCOP3|RX
RB1CC1	RB1-inducible coiled-coil 1		Autism	18252227	Q8TDY2	CC1|FIP200
RBBP8	retinoblastoma binding protein 8		Jawad syndrome, Seckel syndrome 2	21998596	Q99708	COM1|CTIP|JWDS|RIM|SAE2|SCKL2
RBM10	RNA binding motif protein 10		Intellectual Disability	15020472; 22482801; 21910631; 18694825	P98175,Q7Z3D7	DXS8237E|GPATC9|GPATCH9|S1-1|TARPS|ZRANB5
RBM27	RNA binding motif protein 27		Schizophrenia	25056061	Q9P2N5	ARRS1|PSC1
RBPJ	recombination signal binding protein for immunoglobulin kappa J region		Adams-Oliver syndrome 3	22883147	Q06330	AOS3|CBF1|IGKJRB|IGKJRB1|KBF2|RBP-J|RBPJK|RBPSUH|SUH|CSL
RC3H1	ring finger and CCCH-type domains 1	FMRP		21784246	Q5TC82	RNF198|ROQUIN
RC3H2	ring finger and CCCH-type domains 2	FMRP		21784246	Q9HBD1	MNAB|RNF164
RCAN1	regulator of calcineurin 1		Brain Development	21216952	P53805,Q6FGP2	ADAPT78|CSP1|DSC1|DSCR1|MCIP1|RCN1
RCOR1	REST corepressor 1		Brain Development	21088488	J3KN32,Q9UKL0	COREST|RCOR
RERE	arginine-glutamic acid dipeptide (RE) repeats	FMRP	Autism	21784246	Q9P2R6	ARG|ARP|ATN1L|DNB1
REST	RE1-silencing transcription factor		Brain Development	25092546	Q13127	NRSF|XBR
RFC1	replication factor C (activator 1) 1, 145kDa		Alzheimer's disease	18258338	P35251	A1|MHCBFB|PO-GA|RECC1|RFC|RFC140
RFPL3	ret finger protein-like 3		Brain Development	18656177	A2A279,O75679,Q8N5R4	-
RFX4	regulatory factor X, 4 (influences HLA class II expression)		Brain Development	16893423; 17510980	Q33E94	NYD-SP10
RGS6	regulator of G-protein signaling 6		Alzheimer's disease	21098978	B7Z2N1,P49758,Q2M3K2,B7Z2A0	GAP
RGS7	regulator of G-protein signaling 7		Intellectual Disability, Brain Development, Autism	15020472; 22482801; 21910631; 18694825; 24755289	P49802	-
RHOXF1	Rhox homeobox family, member 1		Autism	19404256	Q8NHV9	OTEX|PEPP1
RIMS3	regulating synaptic membrane exocytosis 3		Autism	19546099	Q9UJD0	NIM3|RIM3
RLIM	Ring finger protein, LIM domain interacting		Autism	25735484	Q9NVW2	NY-REN-43|RNF12
RNF112	ring finger protein 112		Alzheimer's disease	24788683	Q9ULX5	BFP|ZNF179
RNF135	ring finger protein 135		Overgrowth syndrome	17632510	Q8IUD6	MMFD|REUL|RIPLET
RNPS1	RNA binding protein S1, serine-rich domain		Autism	23376982	D3DU92,Q15287	E5.1
RORA	RAR-related orphan receptor A		Autism	20375269	P35398	NR1F1|ROR1|ROR2|ROR3|RZR-ALPHA|RZRA
RORB	RAR-related orphan receptor B		Bipolar disorder, schizophrenia	19909500; 19839995	Q92753,Q58EY0	NR1F2|ROR-BETA|RZR-BETA|RZRB|BA133M9.1
RUFY3	RUN and FYVE domain containing 3		Brain Development	17439943	Q7L099	RIPX|SINGAR1
RUNX1	runt-related transcription factor 1		Alzheimer's disease	20946940	Q01196	AML1|AML1-EVI-1|AMLCR1|CBFA2|EVI-1|PEBP2AB
RUNX2	runt-related transcription factor 2		Cleidocranial dysplasia	25119901	Q13950	AML3|CBFA1|CCD|CCD1|OSF-2|OSF2|PEA2AA|PEBP2A1|PEBP2A2|PEBP2AA|PEBP2AA1
RXRA	retinoid X receptor, alpha		Alzheimer's disease	19374686	Q6P3U7,P19793,F1D8Q5	NR2B1
RYBP	RING1 and YY1 binding protein		Brain Development	17874297	Q8N488	AAP1|DEDAF|YEAF1
SALL1	sal-like 1 (Drosophila)		Intellectual Disability, Townes-Brocks syndrome	15020472; 22482801; 21910631; 18694825; 23069192	Q9NSC2	HSAL1|SAL-1|TBS|ZNF794
SALL2	sal-like 2 (Drosophila)	FMRP		21784246	Q9Y467	HSAL2|SAL-2|ZNF795|P150(SAL2)
SAMD4B	sterile alpha motif domain containing 4B	FMRP		21784246	Q5PRF9	SMGB|HSMAUG2
SAP130	Sin3A-associated protein, 130kDa	FMRP		21784246	Q9H0E3	-
SATB1	SATB homeobox 1		Brain Development	22064485	Q01826	-
SATB2	SATB homeobox 2		Autism, Intellectual Disability, Brain Development, Cleft palate and mental retardation	15020472; 22482801; 21910631; 18694825; 22064485	Q9UPW6,Q59FT3,B3KPQ9	-
SCAF1	SR-related CTD-associated factor 1	FMRP		21784246	Q9H7N4	SRA1
SCAPER	S-phase cyclin A-associated protein in the ER		Intellectual Disability	15020472; 22482801; 21910631; 18694825	Q6NSF1,F5H7X8,H3BNR7,Q9BY12	ZNF291|ZFP291
SETBP1	SET binding protein 1		Intellectual Disability, Schinzel-Giedion midface retraction syndrome	15020472; 22482801; 21910631; 18694825; 25082129	Q9Y6X0	SEB
SETD1A	SET domain containing 1A		Schizophrenia	24853937	O15047	KMT2F|SET1|SET1A
SETD2	SET domain containing 2		Autism	22495309	Q9BYW2	HBP231|HIF-1|HIP-1|HYPB|KMT3A|SET2|P231HBP
SETD8	SET domain containing (lysine methyltransferase) 8		Schizophrenia	25056061	Q9NQR1	KMT5A|PR-SET7|SET07|SET8
SETDB1	SET domain, bifurcated 1		Autism, Huntington disease	23055267; 17142323	Q15047	ESET|H3-K9-HMTASE4|KG1T|KMT1E
SETDB2	SET domain, bifurcated 2		Autism	23055267	Q96T68	C13ORF4|CLLD8|CLLL8|KMT1F
SHH	sonic hedgehog		Intellectual Disability, Holoprosencephaly, Schizencephaly	15020472; 22482801; 21910631; 18694825; 24764759; 20157829	Q15465	HHG1|HLP3|HPE3|MCOPCB5|SMMCI|TPT|TPTPS
SIRT1	sirtuin 1		Schizophrenia	20977650	E9PC49,A8K128,Q96EB6	SIR2L1
SIRT5	sirtuin 5		Schizophrenia	16827919	Q9NXA8	SIR2L5
SIX3	SIX homeobox 3		Holoprosencephaly, Schizencephaly	10369266; 20157829	O95343	HPE2
SKI	v-ski sarcoma viral oncogene homolog (avian)	FMRP	Shprintzen-Goldberg syndrome	24736733	P12755	SGS|SKV
SLC4A10	solute carrier family 4, sodium bicarbonate transporter, member 10		Autism	17363630	Q6U841	NBCN2|NCBE
SMAD1	SMAD family member 1		Brain Development	22500633	Q15797	BSP-1|BSP1|JV4-1|JV41|MADH1|MADR1
SMARCA1	SWI/SNF related, matrix associated, actin dependent regulator of chromatin, subfamily a, member 1		Mental retardation (ID)	18302774	Q86UA8,P28370	ISWI|NURF140|SNF2L|SNF2L1|SNF2LB|SNF2LT|SWI|SWI2
SMARCA2	SWI/SNF related, matrix associated, actin dependent regulator of chromatin, subfamily a, member 2	FMRP	Nicolaides-Baraitser syndrome, Schizophrenia	22822383; 20457675	Q56A76,P51531,Q8N9Q1	BAF190|BRM|NCBRS|SNF2|SNF2L2|SNF2LA|SWI2|STH1P|HBRM|HSNF2A
SMARCA4	SWI/SNF related, matrix associated, actin dependent regulator of chromatin, subfamily a, member 4	FMRP	Mental retardation, autosomal dominant 16 (ID)	24658002	B3KNW7,Q9HBD4,P51532,A7E2E1	BAF190|BAF190A|BRG1|MRD16|RTPS2|SNF2|SNF2L4|SNF2LB|SWI2|HSNF2B
SMARCA5	SWI/SNF related, matrix associated, actin dependent regulator of chromatin, subfamily a, member 5		Williams syndrome	10655480	O60264	ISWI|SNF2H|WCRF135|HISWI|HSNF2H
SMARCB1	SWI/SNF related, matrix associated, actin dependent regulator of chromatin, subfamily b, member 1		Mental retardation, autosomal dominant 15 (ID)	24658002	Q9H836,Q12824	BAF47|INI1|MRD15|RDT|RTPS1|SNF5|SNF5L1|SFH1P|SNR1|HSNFS
SMARCC1	SWI/SNF related, matrix associated, actin dependent regulator of chromatin, subfamily c, member 1		Schizophrenia	19367581	Q58EY4,Q92922	BAF155|CRACC1|RSC8|SRG3|SWI3
SMARCC2	SWI/SNF related, matrix associated, actin dependent regulator of chromatin, subfamily c, member 2	FMRP		21784246	Q8TAQ2	BAF170|CRACC2|RSC8
SMURF2	SMAD specific E3 ubiquitin protein ligase 2		Brain Development	17906294	Q96DE7,Q9HAU4	-
SND1	staphylococcal nuclease and tudor domain containing 1		Autism	20442744	Q7KZF4	TDRD11|P100
SNIP1	Smad nuclear interacting protein 1		Psychomotor retardation, epilepsy, and craniofacial dysmorphism	22279524	B1AK66,Q8TAD8	PMRED
SOD2	Superoxide Dismutase 2, Mitochondrial		Schizophrenia	25056061	P04179	-
SORBS2	sorbin and SH3 domain containing 2	FMRP		21784246	H7BXR4,C9JKV9,B7Z1G5,E9PAW4,B7Z997,B3KPQ7,G3XAI0,E9PAS5,O94875,J3KNZ5,B7Z3D7	ARGBP2|PRO0618
SOX1	SRY (sex determining region Y)-box 1		Brain Development	24940564	O00570	-
SOX10	SRY (sex determining region Y)-box 10		Waardenburg syndrome, Intellectual Disability	22963253	P56693	DOM|PCWH|WS2E|WS4|WS4C
SOX11	SRY (sex determining region Y)-box 11		Brain Development	20147379	P35716	-
SOX2	SRY (sex determining region Y)-box 2		Brain Development	24501124	P48431	ANOP3|MCOPS3
SOX21	SRY (sex determining region Y)-box 21		Brain Development	15039105	Q9Y651	SOX25
SOX3	SRY (sex determining region Y)-box 3		Intellectual Disability, Brain Development	15020472; 22482801; 21910631; 18694825; 24257626	P41225	GHDX|MRGH|PHP|PHPX|SOXB
SOX4	SRY (sex determining region Y)-box 4		Brain Development	20147379	Q06945	EVI16
SOX5	SRY (sex determining region Y)-box 5		Autism, Intellectual Disability, Brain Development	15020472; 22482801; 21910631; 18694825; 24744985	B7Z8V0,P35711,F5H5B0	L-SOX5
SOX6	SRY (sex determining region Y)-box 6		Brain Development	24501124	P35712	HSSOX6|SOXD
SOX9	SRY (sex determining region Y)-box 9		Brain Development	25069414	P48436	CMD1|CMPD1|SRA1
SP1	Sp1 transcription factor		Brain Development	24801450	E4Z9M7,G5E9M8,P08047	-
SP4	Sp4 transcription factor		Schizophrenia	19401786	Q02446	HF1B|SPR-1
SP8	Sp8 transcription factor		Brain Development	23307639	Q8IXZ3	BTD
SPEN	spen homolog, transcriptional regulator (Drosophila)	FMRP		21784246	Q96T58	HIAA0929|MINT|RBM15C|SHARP
SRCAP	Snf2-related CREBBP activator protein		Floating-Harbor syndrome	23621943	Q6ZRS2	DOMO1|EAF1|FLHS|SWR1
SREBF1	sterol regulatory element binding transcription factor 1		Alzheimer's disease, Schizophrenia	20167577; 18936756	P36956	SREBP-1C|SREBP1|BHLHD1
SREBF2	sterol regulatory element binding transcription factor 2	FMRP	Schizophrenia	18936756	Q8NCY3,Q12772	SREBP2|BHLHD2
SS18L1	synovial sarcoma translocation gene on chromosome 18-like 1		Brain Development	14716005	O75177	CREST|LP2261
STAT6	signal transducer and activator of transcription 6, interleukin-4 induced		Brain Development	15806304	B4DQB3,P42226,A8K4S9	D12S1644|IL-4-STAT|STAT6B|STAT6C
SUGP1	SURP and G patch domain containing 1		Schizophrenia	25056061	Q8IWZ8	F23858|RBP|SF4
SUPT6H	suppressor of Ty 6 homolog (S. cerevisiae)	FMRP		21784246	Q7KZ85	SPT6|SPT6H|EMB-5
SUV420H1	suppressor of variegation 4-20 homolog 1 (Drosophila)		Autism	22495306	Q4FZB7	CGI85|KMT5B
SUZ12	suppressor of zeste 12 homolog (Drosophila)		Brain Development	19535498	Q15022,A8K1U9	CHET9|JJAZ1
TAF1	TAF1 RNA polymerase II, TATA box binding protein (TBP)-associated factor, 250kDa		Dystonia-Parkinsonism, X-linked	23184149	P21675	BA2R|CCG1|CCGS|DYT3|DYT3/TAF1|KAT4|N-TAF1|NSCL2|OF|P250|TAF2A|TAFII250|XDP
TAF1C	TATA box binding protein (TBP)-associated factor, RNA polymerase I, C, 110kDa		Autism	22843504	B3KUE8,Q15572	MGC:39976|SL1|TAFI110|TAFI95
TAF1L	TAF1 RNA polymerase II, TATA box binding protein (TBP)-associated factor, 210kDa-like		Autism	21572417	Q8IZX4	TAF2A2
TAF2	TAF2 RNA polymerase II, TATA box binding protein (TBP)-associated factor, 150kDa		Intellectual Disability	15020472; 22482801; 21910631; 18694825	B3KMD8,Q6P1X5	CIF150|TAF2B|TAFII150
TAF5	TAF5 RNA polymerase II, TATA box binding protein (TBP)-associated factor, 100kDa		Schizophrenia	25056061	Q15542	TAF2D|TAFII100
TARDBP	TAR DNA binding protein		Frontotemporal lobar degeneration, TARDBP-related	24300238	Q9H256,Q13148	ALS10|TDP-43
TBL1X	transducin (beta)-like 1X-linked		Autism	22050706	O60907	EBI|SMAP55|TBL1
TBL1XR1	transducin (beta)-like 1 X-linked receptor 1		Autism	22495309	Q9BZK7	C21|DC42|IRA1|TBLR1
TBP	TATA box binding protein		Spinocerebellar ataxia 17, Schizophrenia	24972706; 19566714	B4E3B3,F5H869,P20226,Q32MN7	GTF2D|GTF2D1|HDL4|SCA17|TFIID
TBR1	T-box, brain, 1		Autism, Brain Development	24441682	Q16650	TBR-1|TES-56
TBX1	T-box 1		Autism, DiGeorge syndrome, Schizophrenia	16684884; 24357327; 18003636	D9ZGG0,Q152R5,O43435	CAFS|CTHM|DGCR|DGS|DORV|TBX1C|TGA|VCFS
TBX6	T-box 6		Schizophrenia	25056061	O95947	-
TCF20	transcription factor 20 (AR1)	FMRP		21784246	Q9UGU0	AR1|SPBP
TCF25	transcription factor 25 (basic helix-loop-helix)	FMRP		21784246	Q9BQ70	HULP1|NULP1|PRO2620|HKIAA1049
TCF4	transcription factor 4	FMRP	Autism, Intellectual Disability, Pitt-Hopkins syndrome, Schizophrenia	15020472; 22482801; 21910631; 18694825; 24594265	B3KVA4,G0LNU5,P15884,E9PH57,B7Z5M6,H3BTP3	E2-2|ITF-2|ITF2|PTHS|SEF-2|SEF2|SEF2-1|SEF2-1A|SEF2-1B|TCF-4|BHLHB19
TCF7L2	transcription factor 7-like 2 (T-cell specific, HMG-box)		Intellectual Disability	15020472; 22482801; 21910631; 18694825	C6ZRK5,F8W7T5,C6ZRJ9,B9X074,C6ZRK1,C6ZRK0,Q6FHW4,Q9NQB0,C6ZRK2,C6ZRJ7,C6ZRJ8,F8W742,B4DRJ8	TCF-4|TCF4
TEF	thyrotrophic embryonic factor	FMRP		21784246	Q10587	-
TFAM	transcription factor A, mitochondrial		Alzheimer's disease	24887203	A8MRB2,Q00059,E5KSU5	MTTF1|MTTFA|TCF6|TCF6L1|TCF6L2|TCF6L3
TFCP2	transcription factor CP2		Alzheimer's disease	18307033	Q12800	LBP1C|LSF|LSF1D|SEF|TFCP2C
TGFBR1	transforming growth factor, beta receptor 1		Brain Development	15731757	P36897	-
TGIF1	TGFB-induced factor homeobox 1		Holoprosencephaly, Intellectual Disability	10835638	A6NE42,Q15583	HPE4|TGIF
THAP11	THAP domain containing 11		Schizophrenia	25056061	Q96EK4	CTG-B43A|CTG-B45D|RONIN
THAP8	THAP domain containing 8		Autism	25549968	Q8NA92	-
THRA	thyroid hormone receptor, alpha	FMRP	Autism	21784246	Q6FH41,P10827	AR7|CHNG6|EAR7|ERB-T-1|ERBA|ERBA1|NR1A1|THRA1|THRA2|C-ERBA-1
THRB	thyroid hormone receptor, beta		Intellectual Disability	15020472; 22482801; 21910631; 18694825	F1D8N7,P10828	C-ERBA-2|C-ERBA-BETA|ERBA2|GRTH|NR1A2|PRTH|THR1|THRB1|THRB2
TIMELESS	timeless circadian clock		Schizophrenia	25056061	Q9UNS1	TIM|TIM1|HTIM
TLE1	transducin-like enhancer of split 1 (E(sp1) homolog, Drosophila)		Schizophrenia	25056061	Q04724	ESG|ESG1|GRG1
TLE3	transducin-like enhancer of split 3 (E(sp1) homolog, Drosophila)	FMRP		21784246	Q6PI57,B3KM67,E9PD64,Q04726,B3KUA2,Q6PRX2	ESG|ESG3|GRG3|HST18976
TNF	tumor necrosis factor		Alzheimer's disease, Parkinson disease	24998784; 25087727	P01375	-
TNRC18	trinucleotide repeat containing 18	FMRP		21784246	O15417	-
TNXB	Tenascin XB		Schizophrenia	25056061	Q6IPK3	-
TOP2B	topoisomerase (DNA) II beta 180kDa		Autism	23995680	Q02880	TOPIIB|TOP2BETA
TP53	tumor protein p53		Alzheimer's disease	24861546	Q53GA5,P04637,H2EHT1	BCC7|LFS1|P53|TRP53
TP63	tumor protein p63		Alzheimer's disease	20100581	Q9H3D4	AIS|B(P51A)|B(P51B)|EEC3|KET|LMS|NBP|OFC8|RHS|SHFM4|TP53CP|TP53L|TP73L|P40|P51|P53CP|P63|P73H|P73L
TP73	tumor protein p73		Alzheimer's disease	23414597	C9J521,O15350	P73
TRAK1	trafficking protein, kinesin binding 1	FMRP	Brain Development	21454691	B7Z218,J3KNT7,E9PDS2,Q9UPV9,Q659B5,B7ZAE5	MILT1|OIP106
TRIM3	tripartite motif containing 3	FMRP		21784246	B7Z5Y8,O75382	BERP|HAC1|RNF22|RNF97
TRIM32	tripartite motif containing 32	FMRP	Bardet-Biedl syndrome 11	24500717	Q13049	BBS11|HT2A|LGMD2H|TATIP
TRIM33	tripartite motif containing 33		Autism	24189344	B3KN30,Q9UPN9	ECTO|PTC7|RFG7|TF1G|TIF1G|TIF1GAMMA|TIFGAMMA
TRIM8	tripartite motif containing 8		Schizophrenia	25056061	Q9BZR9	GERP|RNF27
TRIM9	tripartite motif containing 9	FMRP		21784246	Q9C026	RNF91|SPRING
TRIP10	thyroid hormone receptor interactor 10		Huntington Disease	12604778	Q15642	CIP4|HSTP|STOT|STP
TRMT1	tRNA methyltransferase 1 homolog (S. cerevisiae)		Intellectual Disability	15020472; 22482801; 21910631; 18694825	Q9NXH9,A8K8L2	TRM1
TRPS1	trichorhinophalangeal syndrome I		Trichorhinophalangeal syndrome	22127049	Q9UHF7	GC79|LGCR
TRRAP	transformation/transcription domain-associated protein	FMRP		21784246	Q9Y4A5	PAF350/400|PAF400|STAF40|TR-AP|TRA1
TSC2	tuberous sclerosis 2	FMRP	Intellectual Disability, Autism, Brain Development	15020472; 22482801; 21910631; 18694825; 24227713	P49815	LAM|TSC4
TSC22D1	TSC22 domain family, member 1	FMRP		21784246	A8K3Y6,Q15714	PTG-2|TGFB1I4|TSC22
TSHZ1	teashirt zinc finger homeobox 1	FMRP		21784246	Q6ZSZ6,A7YF73	CAA|NY-CO-33|SDCCAG33|TSH1
TSN	translin		Autism	16495445	Q15631,B3KRM8	BCLF-1|C3PO|RCHF1|REHF-1|TBRBP|TRSLN
TTF1	transcription termination factor, RNA polymerase I		Intellectual Disability	15020472; 22482801; 21910631; 18694825	Q15361	TTF-1|TTF-I
TTF2	transcription termination factor, RNA polymerase II		Intellectual Disability	15020472; 22482801; 21910631; 18694825	Q9UNY4	HUF2
TULP4	tubby like protein 4	FMRP		21784246	Q9NRJ4	TUSP
UBE2I	ubiquitin-conjugating enzyme E2I		Alzheimer's disease	19765634	P63279,A8K503	C358B7.1|P18|UBC9
UBE2K	ubiquitin-conjugating enzyme E2K		Huntington Disease	8702625	P61086,C9JGP1	E2-25K|HIP2|HYPG|LIG|UBC1
UBE2L3	ubiquitin-conjugating enzyme E2L 3		Parkinson's Disease	24906799	E7EWS7,P68036,B4DSZ4	E2-F1|L-UBC|UBCH7|UBCM4
UBE3A	ubiquitin protein ligase E3A		Intellectual Disability, Autism, Angelman syndrome	15020472; 22482801; 21910631; 18694825; 24672001	Q05086,Q9BUI6,Q9H2G0	ANCR|AS|E6-AP|EPVE6AP|HPVE6A
VHL	von Hippel-Lindau tumor suppressor, E3 ubiquitin protein ligase		Brain Development	10850421	P40337	HRCA1|RCA1|VHL1|PVHL
WBP11	WW domain binding protein 11		Renpenning syndrome	20410308	Q9Y2W2	NPWBP|SIPP1|WBP-11
WHSC1	Wolf-Hirschhorn syndrome candidate 1		Wolf-Hirschhorn syndrome	23963300	O96028	MMSET|NSD2|REIIBP|TRX5|WHS
WHSC1L1	Wolf-Hirschhorn syndrome candidate 1-like 1		Wolf-Hirschhorn syndrome	23011637	Q9BZ95	NSD3|PP14328
WHSC2	Wolf-Hirschhorn syndrome candidate 2		Wolf-Hirschhorn syndrome	22438245	Q9H3P2	NELF-A|NELFA
WNT1	wingless-type MMTV integration site family, member 1		Autism, Osteogenesis impergecta with brain malformations	23709755	P04628	INT1
WWOX	WW domain containing oxidoreductase		Spinocrebellar ataxia	24369382	Q9NZC7	D16S432E|FOR|FRA16D|HHCMA56|PRO0128|SDR41C1|WOX1
XBP1	X-box binding protein 1		Schizophrenia	16342282	P17861	TREB5|XBP-1|XBP2
XPA	xeroderma pigmentosum, complementation group A		Intellectual Disability	15020472; 22482801; 21910631; 18694825	P23025	XP1|XPAC
XPC	xeroderma pigmentosum, complementation group C		Autism	9804340	B4DIP3,E9PH69,Q01831	RAD4|XP3|XPCC
XRCC3	X-ray repair complementing defective repair in Chinese hamster cells 3		Schizophrenia	25056061	Q53XC8,O43542	CMM6
YEATS2	YEATS domain containing 2		Autism	22843504	Q9ULM3	-
YWHAH	Tyrosine 3-Monooxygenase/Tryptophan 5-Monooxygenase Activation Protein, Eta		Schizophrenia	25056061	Q04917	-
YY1	YY1 transcription factor		Intellectual Disability	15020472; 22482801; 21910631; 18694825	P25490	DELTA|INO80S|NF-E1|UCRBP|YIN-YANG-1
ZBED4	zinc finger, BED-type containing 4		Schizophrenia	19693800	O75132	-
ZBTB16	zinc finger and BTB domain containing 16		Autism	22843504	Q05516	PLZF|ZNF145
ZBTB20	zinc finger and BTB domain containing 20		Brain Development	19955470	A8K251,Q9HC78,B2RCW4	DPZF|HOF|ODA-8S|ZNF288
ZBTB40	zinc finger and BTB domain containing 40		Intellectual Disability	15020472; 22482801; 21910631; 18694825	Q1RMZ5,B3KR52,Q9NUA8	ZNF923
ZBTB45	zinc finger and BTB domain containing 45		Brain Development	21131782	Q96K62	ZNF499
ZC3H14	zinc finger CCCH-type containing 14		Intellectual Disability	15020472; 22482801; 21910631; 18694825	Q6PJT7	MSUT-2|NY-REN-37|SUT2|UKP68
ZC3H4	zinc finger CCCH-type containing 4	FMRP		21784246	Q9UPT8	C19ORF7
ZC3H7B	zinc finger CCCH-type containing 7B	FMRP		21784246	Q9UGR2	ROXAN
ZDHHC15	zinc finger, DHHC-type containing 15		Mental retardation, X-linked 91 (ID)	15915161	B3KY34,Q96MV8	MRX91
ZDHHC9	zinc finger, DHHC-type containing 9		Intellectual Disability, Mental retardation, X-linked syndromic, Raymond type	15020472; 22482801; 21910631; 18694825	Q9Y397	CGI89|CXORF11|DHHC9|MMSA1|MRXSZ|ZDHHC10|ZNF379|ZNF380
ZEB2	zinc finger E-box binding homeobox 2	FMRP	Intellectual Disability, Mowat-Wilson syndrome	15020472; 22482801; 21910631; 18694825; 25028418	O60315	HSPC082|SIP-1|SIP1|SMADIP1|ZFHX1B
ZFHX2	zinc finger homeobox 2	FMRP		21784246	B7ZM83,B9EK48,Q9C0A1	ZFH-5|ZNF409
ZFHX4	zinc finger homeobox 4		Chromosome 8q21.11 deletion syndrome	21802062	Q86UP3,G3V138	ZFH4|ZHF4
ZFP106	zinc finger protein 106 homolog (mouse)	FMRP		21784246	Q9H2Y7	SH3BP3|ZNF474
ZFR	zinc finger RNA binding protein	FMRP		21784246	Q96KR1,Q05D65	ZFR1
ZFYVE26	zinc finger, FYVE domain containing 26		Spastic paraplegia 15, autosomal recessive	22554690	Q68DK2	FYVE-CENT|SPG15
ZHX2	zinc fingers and homeoboxes 2		Brain Development	19515908	Q9Y6X8	AFR1|RAF
ZHX3	zinc fingers and homeoboxes 3	FMRP		21784246	Q9H4I2	TIX1
ZIC1	Zic family member 1		Dandy-Walker syndrome	23679990	Q15915	ZIC|ZNF201
ZIC2	Zic family member 2		Intellectual Disability, Holoprosencephaly	15020472; 22482801; 21910631; 18694825; 24706429	O95409	HPE5
ZIC3	Zic family member 3		VACTERL syndrome	20452998	O60481	HTX|HTX1|VACTERLX|ZNF203
ZIC4	Zic family member 4		Dandy-Walker syndrome	23679990	B4DF89,C9J7D5,J3KQG1,Q8N9L1	-
ZMAT2	zinc finger, matrin-type 2		Schizophrenia	25056061	Q96NC0	PTG-12|SNU23|HSNU23
ZMIZ1	zinc finger, MIZ-type containing 1	FMRP		21784246	A0JLS3,Q9ULJ6	MIZ|RAI17|TRAFIP10|ZIMP10|HZIMP10
ZMIZ2	zinc finger, MIZ-type containing 2	FMRP		21784246	Q8NF64	NET27|TRAFIP20|ZIMP7|HZIMP7
ZMYND11	zinc finger, MYND-type containing 11		Autism	22542183	Q5UGI2,F6UH50,B7Z2J6,Q5BJG6,Q15326,Q8N4B3,B7Z293	BRAM1|BS69
ZNF18	zinc finger protein 18		Autism	22511880	P17022	HDSG1|KOX11|ZKSCAN6|ZNF535|ZFP535
ZNF238	zinc finger and BTB domain containing 18	FMRP		21784246	Q99592	C2H2-171|RP58|TAZ-1|ZBTB18
ZNF292	zinc finger protein 292		Alzheimer's disease	21116278	Q6P495,Q3LIB3,O60281,Q6ZW83,Q6ZS01	NBLA00365|ZFP292|ZN-16|ZN-15|BA393I2.3
ZNF335	zinc finger protein 335		Microcephaly 10, primary, autosomal recessive	23178126	Q9H4Z2,Q8IW09	NIF-1|NIF1|NIF2
ZNF365	zinc finger protein 365	FMRP		21784246	Q70YC5,Q70YC4	SU48|UAN|ZNF365D
ZNF384	zinc finger protein 384		Intellectual Disability	15020472; 22482801; 21910631; 18694825	Q8TF68	CAGH1|CAGH1A|CIZ|ERDA2|NMP4|NP|TNRC1
ZNF385B	zinc finger protein 385B		Autism, Chromosome 2q31.2 deletion syndrome	18413373	Q569K4	ZFN533|ZNF533
ZNF395	zinc finger protein 395		Huntington Disease	14625278	Q7L9C8,Q9H8N7	HDBP-2|HDBP2|HDRF-2|PBF|PRF-1|PRF1|SI-1-8-14
ZNF407	zinc finger protein 407		Autism	23195952	Q9C0G0	-
ZNF408	zinc finger protein 408		Schizophrenia	25056061	Q9H9D4,B4DXY4	-
ZNF41	zinc finger protein 41		Intellectual Disability, Mental retardation X-linked	15020472; 22482801; 21910631; 18694825	P51814	MRX89
ZNF462	zinc finger protein 462	FMRP		21784246	Q63HJ5,Q96JM2	ZFP462
ZNF517	zinc finger protein 517		Autism	23275889	Q6ZMY9,A0AV05	-
ZNF521	zinc finger protein 521	FMRP		21784246	Q96K83	EHZF|EVI3
ZNF526	zinc finger protein 526		Intellectual Disability	15020472; 22482801; 21910631; 18694825	H9ZYJ3,Q8TF50	-
ZNF536	zinc finger protein 536	FMRP		21784246	O15090	-
ZNF592	zinc finger protein 592		Spinocerebellar ataxia, autosomal recessive 5	20531441	Q92610	CAMOS|SCAR5
ZNF630	zinc finger protein 630		Mental retardation (ID)	20186789	F8WAG4,Q2M218	DJ54B20.2
ZNF673	KRAB box domain containing 4		Chromosome Xp11.3 deletion syndrome	16385466	Q5JUW0	ZNF673
ZNF674	zinc finger protein 674		Intellectual Disability, Mental retardation, X-linked 92	15020472; 22482801; 21910631; 18694825	Q2M3X9	MRX92|ZNF673B
ZNF704	zinc finger protein 704	FMRP		21784246	Q6ZNC4	GIG1
ZNF711	zinc finger protein 711		Intellectual Disability, Mental retardation, X-linked 97	15020472; 22482801; 21910631; 18694825	Q6PK66,Q9Y462	CMPX1|MRX97|ZNF4|ZNF5|ZNF6|ZFP711|DJ75N13.1
ZNF713	zinc finger protein 713		Autism	25363768	Q8N859	-
ZNF74	zinc finger protein 74		DiGeorge syndrome	10585771	Q05BG0,B5MCE3,Q16587,A8K5P3	COS52|ZFP520|ZNF520|HZNF7
ZNF774	zinc finger protein 774		Autism	25363760	Q6NX45	-
ZNF8	zinc finger protein 8		Autism	22542183	P17098,B3KS94	HF.18|ZFP128
ZNF804A	zinc finger protein 804A		Schizophrenia	25065377	Q7Z570	C2ORF10
ZNF81	zinc finger protein 81		Intellectual Disability, Mental retardation, X-linked 45	15020472; 22482801; 21910631; 18694825	P51508	HFZ20|MRX45|DJ54B20.6
ZNF827	zinc finger protein 827	FMRP	Autism	21784246	Q17R98	-
ZNFX1	zinc finger, NFX1-type containing 1	FMRP		21784246	Q9P2E3	-
ZSCAN2	zinc finger and SCAN domain containing 2		Schizophrenia	25056061	Q7Z7L9	ZFP29|ZNF854
