# Supplementary material for: A Consensus Network of Gene Regulatory Factors in the Human Frontal Lobe
Source: Front Genet. 2016 Mar 8;7:31. doi: 10.3389/fgene.2016.00031 (PMC4782181; doi:10.3389/fgene.2016.00031)
Supplement: Supplementary file 4 [file Table4.XLSX]

## Sheet: PPi_Interactions
Table S4
Complete list of GRFs and their correlated genes having with known protein - protein interaction.
The correlation is calculated using the mean of the correlations across the 10 datasets.
TF	Gene	Correlation mean
ABCA2	CDK5RAP2	0.005924282003615
ACVR1	ACVR1B	0.726987049285502
ACVR1	ACVR2A	0.465202519458137
ACVR1	BMP7	-0.455841257574114
ACVR1	BMPR2	0.172254402775166
ACVR1	ENG	0.132332500276426
ACVR1	FNTA	0.656841500532916
ACVR1	GDF5	0.273229317829565
ACVR1	INHBA	0.438360130820987
ACVR1	SMAD1	0.710668923373969
ACVR1	SMAD5	0.0553607292971107
ACVR1B	ACVR1	0.726987049285502
ACVR1B	ACVR2A	0.61477473701152
ACVR1B	ACVR2B	0.569122577631247
ACVR1B	INHBA	0.635037377030868
ACVR1B	INHBB	0.150840341647164
ACVR1B	SMAD2	0.495540315009648
ACVR1B	SMAD3	-0.609535595049312
ACVR1B	SMAD7	0.0051337037743065
ACVR1B	SMURF1	0.0691629660860145
ACVR1B	SNX1	-0.483592861627842
ACVR1B	SNX2	0.353413813054503
AFF1	MLLT1	-0.437731543967561
AFF1	MLLT3	-0.042017573322104
AFF1	SIAH1	-0.119780638049264
AFF1	SIAH2	-0.443029769899753
AFF1	SMAD9	0.418071400839148
AKAP9	CALM1	-0.433573462626119
AKAP9	CALM2	-0.273282210354449
AKAP9	CDC5L	0.506283535905542
AKAP9	CLIC1	0.0875444871913671
AKAP9	CSNK1D	-0.0914585414585415
AKAP9	CSNK1E	0.584264608040733
AKAP9	DISC1	-0.667131927630805
AKAP9	FNBP1	-0.277926604756238
AKAP9	KCNQ1	-0.483502267181596
AKAP9	PCNT	0.208329922014837
AKAP9	PKN1	-0.214422415164756
AKAP9	PRKAR2A	0.67002273900129
AKAP9	TACC3	-0.643956043956044
AKAP9	TNIK	0.620943596805344
AKAP9	TRIP10	-0.466849323400708
AKAP9	TUBGCP3	0.324189468439309
ANP32A	ADAP1	-0.648391299919709
ANP32A	APEX1	0.585064153836688
ANP32A	ATXN1	-0.157367411027306
ANP32A	AXIN1	0.0784182880506868
ANP32A	HSPB3	0.110280009592279
ANP32A	KPNA1	0.621941840516771
ANP32A	KPNA5	0.500817093179023
ANP32A	KPNA6	0.234730064262728
ANP32A	MAP1B	-0.021174057694189
ANP32A	SET	0.673637913428228
ANP32A	THRB	-0.0788632104087735
ANP32A	XPO1	0.323378301184836
ARHGEF11	GNA12	-0.442176181467624
ARHGEF11	GNA13	-0.499168468243207
ARHGEF11	PLXNB1	0.479542488734985
ARHGEF11	PLXNB2	0.212319273000068
ARHGEF11	PLXNB3	0.564142068209747
ARHGEF11	RHOA	-0.42399997156164
ARID1A	ACTL6A	0.592009176321884
ARID1A	ARID1B	0.737038163180552
ARID1A	BAZ1B	0.584275730884458
ARID1A	GATA1	-0.152670957965792
ARID1A	ING1	0.119639727640435
ARID1A	PBRM1	0.737431182571953
ARID1A	PHF10	-0.457174772089856
ARID1A	SMARCA2	0.539710970175888
ARID1A	SMARCA4	0.687490118058788
ARID1A	SMARCB1	0.597795723749844
ARID1A	SMARCC1	0.62372295085475
ARID1A	SMARCC2	0.579173755493017
ARID1A	SMARCD1	0.755686195847723
ARID1A	SMARCD2	-0.0489194476321675
ARID1A	SMARCE1	0.566213108604713
ARID4A	BRMS1	-0.14283560037131
ARID4A	HDAC1	0.152254995159911
ARID4A	RB1	0.706716947213422
ARID4A	RBL1	0.710882992039894
ARID4A	SIN3A	0.452265749755672
ARNT2	BCL6	0.0838778455593843
ARNT2	NPAS4	0.630616212082934
ARNT2	SIM2	-0.122035793431427
ARNT2	USP7	-0.072557298137709
ARNTL	AHR	0.415765360857589
ARNTL	CLOCK	0.685711591554558
ARNTL	CRY1	-0.556978543548063
ARNTL	CSNK1E	-0.432651621483199
ARNTL	EP300	-0.434419343124673
ARNTL	EPAS1	0.726566756913671
ARNTL	HIF1A	-0.530797919911888
ARNTL	KAT2B	0.187866358380602
ARNTL	NPAS2	0.644128416962014
ARNTL	NPAS4	0.522534658327611
ARNTL	SIRT1	-0.543681310916709
ASH2L	CHD8	-0.609288928126137
ASH2L	DPY30	0.697116571836313
ASH2L	ESR1	-0.532672003575058
ASH2L	HCFC1	0.254653770361145
ASH2L	HCFC2	-0.263619043037577
ASH2L	HIST3H3	-0.127544280346935
ASH2L	KDM6A	-0.202254601552407
ASH2L	KDM6B	-0.540325709367666
ASH2L	MEN1	-0.38547939532298
ASH2L	NCOA6	-0.472141580415518
ASH2L	RBBP5	0.627050601689653
ASH2L	SMAD9	-0.542200128738382
ASH2L	UNC119	-0.423208272832096
ASH2L	WDR5	0.480701754385965
ATF2	ATF3	-0.680280892447607
ATF2	BACH1	0.649120916921986
ATF2	BATF	-0.481156013497267
ATF2	BATF3	-0.659358188828871
ATF2	CEBPB	-0.271852714885412
ATF2	CEBPG	0.645532395451844
ATF2	CREBBP	0.488777730363912
ATF2	CSNK2A2	0.593294008324922
ATF2	DDIT3	-0.645932952457979
ATF2	EP300	-0.000130901833801003
ATF2	FOS	-0.0300825142619075
ATF2	FOSL1	-0.480445401223102
ATF2	H2AFY	0.210227482568175
ATF2	HMGA1	0.289237725722115
ATF2	JDP2	-0.679604313273566
ATF2	JUN	0.452010010284836
ATF2	MAPK1	0.80876696446839
ATF2	MAPK10	0.3116971883429
ATF2	MAPK11	-0.684507884037245
ATF2	MAPK13	-0.517336607702937
ATF2	MAPK14	0.664341317667922
ATF2	MAPK8	0.672650976459602
ATF2	MAPK9	0.507649569832128
ATF2	NBN	0.658365642663042
ATF2	NCOA6	0.435993700252559
ATF2	PML	-0.644874851188274
ATF2	RB1	0.744494072813318
ATF2	RUVBL2	0.318653022384988
ATF2	SMAD3	-0.0874656581688455
ATF2	SMAD4	0.619495437759327
ATF2	TMX1	0.582451954385635
ATF2	UBE2I	-0.00850949598655848
ATF2	UTF1	-0.065017190731379
ATF2	YY1	0.571252830384154
ATF7IP	DISC1	-0.704917818121524
ATF7IP	MBD1	-0.129624234560919
ATF7IP	SETDB1	0.720965469788905
ATF7IP	SMAD4	0.655511236946598
ATF7IP	SP1	0.551567693134942
ATRX	DAXX	-0.319081083295514
ATRX	EZH2	0.563604029927489
ATRX	HDAC4	0.492430885955939
ATRX	KIAA1377	0.673673694726326
ATRX	LUC7L2	0.276108726727584
ATRX	NEK1	0.453035074369683
ATRX	PTN	0.432447948267321
ATRX	PTPN4	0.434762796113634
ATRX	RAD51	0.249952897018913
ATRX	ZNF512B	0.147979865775184
BACH1	ATF2	0.649120916921986
BACH1	BRCA1	-0.108775347794869
BACH1	MAFB	0.63872927072927
BACH1	MAFG	-0.616280612587496
BACH1	MAFK	-0.594946618314379
BACH1	PATZ1	0.608154329181172
BAZ2B	CTBP2	0.334812446067299
BCL10	AKT1	0.238230462990018
BCL10	BCL3	-0.210636691349824
BCL10	C9orf89	-0.393702521175073
BCL10	CARD10	0.393080666688017
BCL10	CARD11	-0.549718949369495
BCL10	CARD14	-0.154688076178808
BCL10	CARD9	0.565934065934066
BCL10	CHUK	0.496424230712157
BCL10	HIST1H2BC	0.74291689182545
BCL10	IKBKB	-0.273992723913477
BCL10	IKBKG	-0.690609390609391
BCL10	KRT33B	-0.171115642968828
BCL10	MALT1	0.670380051159805
BCL10	MAP3K7	0.558245190599675
BCL10	NLRC4	-0.316322946513071
BCL10	PRKCQ	-0.824409884067059
BCL10	TNFRSF10A	-0.271027028922808
BCL10	TNFRSF1A	-0.315617163317107
BCL10	TRADD	-0.457962930283775
BCL10	TRAF2	0.0909567530828787
BCL10	TRAF6	0.627425548178326
BCL10	UBC	-0.49143475706929
BCL11A	BCL6	0.086874265696132
BCL11A	NR2F1	0.511856916146093
BCLAF1	CHD1	0.789259131492328
BCLAF1	CLK1	0.410840413258751
BCLAF1	EMD	0.623599014719901
BCLAF1	UBC	-0.239259269255314
BCLAF1	YWHAG	0.452834091052754
BHLHE40	BHLHE41	0.625450387635849
BHLHE40	CHD3	-0.686427045347828
BHLHE40	SETDB1	-0.512682525242724
BHLHE40	STAT3	0.513229163627349
BHLHE40	TP53	-0.620798419223562
BHLHE40	UBE2I	-0.318274914467355
BHLHE40	VIM	-0.345445777918197
BHLHE40	ZHX1	-0.534425210599743
BLOC1S1	BLOC1S2	0.064214801248684
BLOC1S1	BLOC1S3	0.790909090909091
BLOC1S1	DTNBP1	0.46024577172341
BLOC1S1	MTA1	0.131345440072095
BLOC1S1	PTN	-0.399852928204854
BLOC1S1	SNAPIN	0.591981198712281
BMP2	ACTR2	-0.413619592520351
BMP2	BMPR1A	0.555508747623139
BMP2	BMPR1B	-0.303514477580095
BMP2	BMPR2	0.399056767766937
BMP2	COL2A1	0.489739691760884
BMP2	ENG	0.326977092896587
BMP2	MGP	-0.292623927167952
BMP2	SOSTDC1	0.573514294165444
BMP7	ACVR1	-0.455841257574114
BMP7	ACVR2A	-0.548554778457949
BMP7	ACVR2B	-0.410201837073256
BMP7	BMPR1A	0.089689858427178
BMP7	BMPR1B	0.75383793442797
BMP7	BMPR2	-0.474473308335785
BMP7	ENG	0.483241472442108
BMP7	NOG	0.176641089808553
BMP7	SOSTDC1	-0.306282554765562
BPTF	HIST3H3	-0.194267039665005
BPTF	MAZ	0.568593408651952
BPTF	RBBP4	0.501456939566253
BRD1	FEZ1	-0.671755711605376
BRD1	TAL1	-0.255355873760508
BRD1	VIM	0.483553372864743
BRD1	ZNF512B	0.580648639313965
BRD3	YEATS4	0.492571793523416
BRF1	DTNBP1	-0.400711771194048
BRF1	GTF3C3	-0.577919134480604
BRF1	GTF3C5	0.543077441953868
BRF1	RB1	-0.436429362036422
BRF1	RBL1	-0.155276211584055
BRF1	RBL2	-0.097021967073762
BRF1	TBP	0.260185524442798
BRF1	TP53	-0.00792869727732835
BTAF1	GTF2H4	0.375295554141258
BTAF1	MVD	0.146424506327813
BTAF1	TBP	0.481693340929083
BTBD3	PLXNB3	0.285998907114721
BTF3	CSNK2B	0.407961334727886
BTF3	ESR1	-0.136335360145806
BTF3	POLR2B	0.557418706101971
BTG1	CNOT7	0.341759433982149
BTG1	CNOT8	0.554722585980212
BTG1	HOXB9	-0.189055977858304
BTG1	PRMT1	0.129658654368315
CAMKK2	CAMK1	0.557467400086389
CAMKK2	PRKAA2	0.507692307692308
CAMKK2	PRKACA	0.592503334156639
CAMKK2	SGK1	-0.398000725004784
CAND1	CUL1	0.685416954425209
CAND1	CUL2	0.714807478601613
CAND1	CUL3	0.747252453998765
CAND1	CUL4A	0.703886988793733
CAND1	CUL4B	0.749968088421609
CAND1	RBX1	0.49489924132298
CAND1	SKP1	0.597998789470095
CAND1	SND1	-0.026310613519696
CBFA2T2	ATN1	0.417725056510264
CBFA2T2	CBFA2T3	-0.251005217448047
CBFA2T2	MDFI	-0.230465103962284
CBFA2T2	NCOR1	0.712317006683435
CBFA2T2	RERE	0.16161210510425
CBFA2T2	RUNX1	-0.0810322381385825
CBFA2T2	RUNX1T1	0.353246585213187
CBFA2T2	SIN3A	0.765069388050247
CBFA2T2	TAL1	-0.623887786516991
CBFA2T2	WDYHV1	0.474988379596565
CBFB	CHGB	-0.552206622836542
CBFB	RUNX1	-0.31812149846561
CBFB	RUNX3	-0.361064721706246
CBX1	ARL5A	0.59136247877759
CBX1	C11orf30	0.495969411044675
CBX1	CBX3	0.633899853273226
CBX1	CBX5	0.526938744402011
CBX1	CHAF1A	0.183245977997318
CBX1	DNMT1	0.585431629699758
CBX1	DNMT3A	0.577281959070324
CBX1	DNMT3B	0.272944497600905
CBX1	H3F3A	0.873626373626374
CBX1	HIST1H3A	0.328275020541093
CBX1	HIST1H3B	0.465503311304123
CBX1	HIST3H3	0.366572167557258
CBX1	PIM1	0.350191389455149
CBX1	RPL12	0.512912087912088
CBX1	SP100	-0.513425962699721
CBX1	SUV39H1	-0.569512141084722
CBX1	TRIM28	0.563422186294561
CBX1	UCHL1	-0.196324891550547
CBX3	ATXN7L2	-0.615384615384615
CBX3	CBX1	0.633899853273226
CBX3	CBX5	0.569194337049681
CBX3	DSN1	-0.518640252603215
CBX3	E2F6	0.510043952015519
CBX3	HIST1H1E	0.091382336689087
CBX3	HIST1H3A	0.625478877731268
CBX3	HIST3H3	0.381716643196389
CBX3	L3MBTL2	-0.65542509558023
CBX3	LBR	0.754804707729917
CBX3	MGA	0.608791208791209
CBX3	MIS12	0.720723354629503
CBX3	MKI67	0.300419017444596
CBX3	NSL1	0.381568938446019
CBX3	PCGF6	0.558166711670892
CBX3	PIM1	0.625501067024369
CBX3	RING1	-0.538660184381243
CBX3	RNF2	0.679577387943276
CBX3	SP100	-0.182377023539139
CBX3	TRIM28	0.217483569166798
CBX3	YAF2	0.57816741078218
CBX5	ARL5A	0.73006993006993
CBX5	BCL11B	0.563098491501038
CBX5	CBX1	0.526938744402011
CBX5	CBX3	0.569194337049681
CBX5	CHAF1A	0.450430283343308
CBX5	CHAF1B	-0.587692307692308
CBX5	DNMT1	0.54251074512969
CBX5	DNMT3A	0.499589021798484
CBX5	DNMT3B	0.114293133893083
CBX5	DSN1	-0.232666104880345
CBX5	FSHR	-0.39856553386256
CBX5	HDAC1	0.0033410820796625
CBX5	HDAC4	0.340025742932402
CBX5	HDAC5	-0.205137010008406
CBX5	HDAC9	0.566190008262385
CBX5	HIST1H1E	0.581351414730093
CBX5	HIST1H3A	0.492268636303974
CBX5	HIST1H3B	0.509864769614086
CBX5	HIST3H2A	-0.02439508571869
CBX5	HIST3H2BB	0.50677161130228
CBX5	HIST3H3	-0.0941908658666402
CBX5	HIST4H4	0.609090909090909
CBX5	INCENP	-0.244364968523668
CBX5	LBR	0.566823472464668
CBX5	MBD1	-0.447710951693128
CBX5	MIS12	0.676974575669137
CBX5	NSL1	0.604400597856232
CBX5	PRR14	0.220384735648228
CBX5	SMARCA4	0.526112317220667
CBX5	SP100	-0.284996160608655
CBX5	SUV39H1	-0.301695593376023
CBX5	TAF4	0.505747955462594
CBX5	TBP	0.203574474730128
CBX5	TCEB3B	-0.379446578264684
CBX5	TRIM28	-0.0343240842961725
CBX5	XRCC6	-0.364200140944327
CBX6	BMI1	-0.358670070514422
CBX6	CBX4	0.495365023702962
CBX6	PCGF1	0.104050251106155
CBX6	PCGF2	-0.306197189500186
CBX6	PCGF3	-0.394189473401599
CBX6	PCGF5	0.725659280801454
CBX6	PCGF6	-0.149291975084666
CBX6	PHC1	-0.43796607489101
CBX6	PHC2	-0.017673030374938
CBX6	PHC3	-0.651880598565125
CBX6	RING1	0.265827148007686
CBX6	RNF2	-0.0856528005341127
CBX7	BMI1	-0.230374313413252
CBX7	RING1	0.527724558816603
CCNC	CDK3	-0.561840225675072
CCNC	CDK8	0.494606346300232
CCNC	CREBBP	0.355681018039044
CCNC	MED1	0.499867497080478
CCNC	MED10	0.297556799799816
CCNC	MED12	-0.529664509341277
CCNC	MED19	0.448631983507123
CCNC	MED26	0.204092687226127
CCNC	MED28	0.569855956546788
CCNC	MED29	-0.532584323207406
CCNC	MED6	0.609220946067883
CCNT2	CDK9	-0.286343864724818
CCNT2	HEXIM1	-0.432159548035789
CCNT2	PKN1	0.027993040955456
CCNT2	RB1	0.581887917059071
CCNT2	SUPT5H	-0.496511357105183
CDC5L	AKAP9	0.506283535905542
CDC5L	CCDC136	-0.428595418856773
CDC5L	CDK2	0.486933300022166
CDC5L	CDKN1A	-0.533400296454913
CDC5L	CDKN2A	-0.564819436844192
CDC5L	CDT1	-0.382747920961298
CDC5L	DISC1	-0.803030137483989
CDC5L	HOOK1	0.255624912173574
CDC5L	KIF3C	0.401434208829045
CDC5L	KIF5B	0.314491994828302
CDC5L	MCM10	0.28847892359492
CDC5L	MCM3	-0.441547013560885
CDC5L	MCM4	0.609604471229829
CDC5L	MCM5	0.083946784773662
CDC5L	MYT1L	0.602299882209995
CDC5L	PDE4DIP	-0.100102796572707
CDC5L	PLRG1	0.659950921212686
CDC5L	PPFIA2	0.639046773639797
CDC5L	PPP1CA	-0.382505786450727
CDC5L	PPP1R13B	-0.532052820893359
CDC5L	PPP1R8	0.590895160884044
CDC5L	SF3A2	0.182672980790629
CDC5L	SPTBN1	-0.12724848299727
CDC5L	TRAF3IP1	0.279150476268783
CDC5L	TTF2	-0.414298793263098
CDC5L	YWHAZ	0.752326827169538
CDC5L	ZNF451	0.390281354610451
CDK5	AMPH	0.567427135654573
CDK5	APP	0.550327573001776
CDK5	CABLES1	-0.360808172033802
CDK5	CCND2	-0.210951706680721
CDK5	CDC37	0.466848155449221
CDK5	CDK5R1	0.38443045604916
CDK5	CDK5RAP2	-0.583782147928145
CDK5	CDKN1A	0.456998761051527
CDK5	CDKN1B	-0.382261191116584
CDK5	CSK	0.52733345606575
CDK5	DAB1	0.111845223623475
CDK5	DNM1	0.513117557418449
CDK5	GAK	0.854545454545455
CDK5	LMTK2	0.534833325249482
CDK5	MAPT	0.558612720614364
CDK5	NDEL1	0.544968473194563
CDK5	NEFH	0.529435483870968
CDK5	NES	-0.252457471418092
CDK5	PAK1	0.583022406947259
CDK5	PCNA	0.400924225109482
CDK5	PSEN1	-0.173234811057863
CDK5	STX1A	0.623577574221625
CDK5	STXBP1	0.514796414455371
CDK5	TP53	-0.468202924856368
CDK8	BRCA1	-0.587312648591718
CDK8	CCNC	0.494606346300232
CDK8	CCNH	0.557690528767143
CDK8	CEBPB	-0.638526155085015
CDK8	CREBBP	0.514690179837645
CDK8	KAT2B	-0.359261557639661
CDK8	MED1	0.553882818311375
CDK8	MED10	0.780166814903157
CDK8	MED11	-0.673351648351648
CDK8	MED12	-0.055783324831203
CDK8	MED13	0.68328099655764
CDK8	MED13L	0.663498604264478
CDK8	MED14	0.614970805507206
CDK8	MED15	-0.514670007071604
CDK8	MED16	0.0839797124839847
CDK8	MED17	0.662285910540836
CDK8	MED18	-0.532593074621646
CDK8	MED19	0.523250935977751
CDK8	MED20	0.597400201049423
CDK8	MED21	0.720253792192187
CDK8	MED22	-0.636363636363636
CDK8	MED23	0.711120851298009
CDK8	MED24	0.690318061785446
CDK8	MED25	-0.041512189122499
CDK8	MED26	0.509158996949698
CDK8	MED27	0.400033637461226
CDK8	MED28	0.662367006368594
CDK8	MED29	-0.690042796344332
CDK8	MED30	0.176083780914458
CDK8	MED31	0.33433511102793
CDK8	MED4	0.621532355182353
CDK8	MED6	0.111968268291496
CDK8	MED7	0.535477477453358
CDK8	MED8	0.492982456140351
CDK8	MED9	-0.556873473469421
CDK8	PARP1	0.592307622375797
CDK8	POLR2A	-0.70310479783593
CDK8	SMARCA2	0.587517036867616
CDK8	SMARCB1	0.136568719346139
CDK8	SMARCC1	0.657105815830914
CDK8	SMARCC2	-0.221691637766672
CDK8	SREBF1	-0.715451515245753
CDK8	TCEA1	0.709029152520543
CDK8	THRA	0.531606579075582
CDK8	THRAP3	0.680415951437747
CDK8	TRRAP	0.52312875223515
CDYL	HDAC1	0.320750038428957
CDYL	HDAC2	-0.405228033883354
CDYL	HIST1H3A	0.0820953072321505
CDYL	WIZ	-0.451609727205037
CEBPB	AR	0.244750370986843
CEBPB	ATF2	-0.271852714885412
CEBPB	CASP8	0.616286200325378
CEBPB	CDK8	-0.638526155085015
CEBPB	CEBPG	0.148845672724628
CEBPB	CREB1	-0.346606940209902
CEBPB	CREBBP	-0.380771060483418
CEBPB	DDIT3	0.265839037934704
CEBPB	EGFR	0.580402620643434
CEBPB	EGR1	0.720201273308915
CEBPB	EP300	-0.294397165479369
CEBPB	ESR1	0.554621484280616
CEBPB	FOXO1	0.71667325427261
CEBPB	HMGA1	0.435353998588348
CEBPB	HNRNPK	0.033569564258168
CEBPB	HSF1	0.429415288184688
CEBPB	MAPK1	0.257997644142003
CEBPB	MED23	-0.473183430612413
CEBPB	MED26	0.328755001921841
CEBPB	MYB	-0.682018721589646
CEBPB	MYC	-0.432106533881636
CEBPB	NFKB1	-0.0738347256310695
CEBPB	NOLC1	-0.643118385994117
CEBPB	NR3C1	0.650746121494105
CEBPB	RARB	-0.0582283641289945
CEBPB	RB1	0.049634043445383
CEBPB	RELA	-0.487668849549755
CEBPB	RUNX1	0.540645618303115
CEBPB	SMAD3	0.60081011628238
CEBPB	SMAD4	-0.120324618997597
CEBPB	SMARCA2	-0.412553521616203
CEBPB	SMARCA4	-0.727663544966148
CEBPB	SMARCB1	-0.710867517377074
CEBPB	SMARCC1	-0.556575018007402
CEBPB	SP1	-0.55721863298016
CEBPB	SPI1	0.680047067740178
CEBPB	SRF	0.306543406724466
CEBPB	TAF9	-0.595867960219782
CEBPB	TRIM28	-0.324116523830696
CHD1	ARRB1	-0.689522826863583
CHD1	BCLAF1	0.789259131492328
CHD1	HDAC1	0.559346060384991
CHD1	NCOR1	0.652647073000926
CHD1	PAF1	-0.220091319013954
CHD1	SAFB	-0.0387786923103395
CHD1	SSRP1	0.030495859525617
CHD3	ADH5	-0.0889009185729045
CHD3	ATPIF1	-0.57196624254889
CHD3	BARD1	0.128075807469519
CHD3	BHLHE40	-0.686427045347828
CHD3	C4orf17	-0.150974601516245
CHD3	CASP6	0.318623945122222
CHD3	CASP8	-0.605861298661394
CHD3	CHD4	0.664250039903612
CHD3	CPE	-0.20380758798196
CHD3	CRCT1	0.128896545518982
CHD3	CREB1	-0.272246903423
CHD3	CSTF2	0.647160086961273
CHD3	CTTN	-0.381419442987389
CHD3	ESR1	-0.386648984281572
CHD3	FAM134A	0.125680284133621
CHD3	FUBP1	0.631117819060619
CHD3	GIT1	0.337817254786871
CHD3	GPS2	0.339294269338525
CHD3	HABP4	-0.56823101417649
CHD3	HDAC1	0.200347939017544
CHD3	HDAC2	0.703761673001493
CHD3	HSPH1	-0.611511710022122
CHD3	HTT	0.300047086130133
CHD3	IK	-0.041886316326663
CHD3	IKZF1	-0.370462131330034
CHD3	IMMT	0.137315010570825
CHD3	IVNS1ABP	0.699231516243147
CHD3	KIF15	0.000949427062459984
CHD3	KPNB1	0.416122038882249
CHD3	LUC7L2	-0.237125376419251
CHD3	MAFG	0.111808446936102
CHD3	MAN2A2	-0.390756595035762
CHD3	MBD2	-0.701443089507757
CHD3	MBD3	0.372625791370486
CHD3	MTA1	0.732782608108936
CHD3	MTA2	0.765513113478275
CHD3	MTA3	-0.095022801850564
CHD3	NEFL	-0.608320834282527
CHD3	PAICS	-0.817782630805887
CHD3	PCMT1	-0.642041486673154
CHD3	PIAS4	0.413270894962533
CHD3	PRG2	0.502307692307692
CHD3	PRPF40A	-0.235093701310074
CHD3	PSME1	0.087412587412587
CHD3	PTN	0.541983468825694
CHD3	PTPRS	0.831077826667075
CHD3	PUF60	0.572352155712638
CHD3	RAD21	-0.121734878876786
CHD3	RAD51	0.405306577227579
CHD3	RBBP4	0.624159253066205
CHD3	RBBP7	-0.442705707791962
CHD3	RPL29	0.628604319286615
CHD3	SAFB	0.494776327429595
CHD3	SAT1	-0.50456129148968
CHD3	SDCCAG3	0.52221018626273
CHD3	SERBP1	0.481012894681438
CHD3	SERF2	-0.422723692306709
CHD3	SIRT6	0.635431453836622
CHD3	SKIL	0.182567523180813
CHD3	SLC27A6	-0.381806380767071
CHD3	SMARCA5	-0.541007561179547
CHD3	SRRT	0.636060081129276
CHD3	SUMO2	0.07360530222828
CHD3	TAL1	0.0200690743266655
CHD3	TCERG1	0.234262837005551
CHD3	THOC7	-0.239779320344226
CHD3	TNFRSF14	-0.371738859699312
CHD3	TP53	0.586712028317458
CHD3	TP73	-0.627272727272727
CHD3	TRIM28	0.740217308673224
CHD3	TSPAN6	0.261870062872162
CHD3	TTR	-0.283935935942281
CHD3	TXNDC9	-0.382779841128901
CHD3	UBA3	-0.416797753814305
CHD3	UBE2I	0.387998304856685
CHD3	VIM	0.563893308180899
CHD3	XRCC4	-0.282689422355589
CHD3	ZHX1	-0.308239055781857
CHD9	ESR1	0.208744735609624
CHD9	NR1I3	-0.645006218361563
CHD9	PPARA	-0.574386887664374
CHD9	RXRA	-0.644651965220033
CIAO1	FAM96A	-0.344107777163167
CIAO1	FAM96B	0.609090909090909
CIAO1	GAS8	0.479008157562443
CIAO1	KIAA1967	0.541838908570493
CIAO1	MLF2	0.607300104368745
CIAO1	MMS19	0.512405268290182
CIAO1	MYO1C	-0.440377505771748
CIAO1	USP11	0.627206947587192
CIAO1	WT1	-0.173944853430264
CIC	ATXN1	-0.230647252541673
CIC	CENPJ	0.629736499435129
CIC	GABPB1	-0.385750493469469
CIC	GTPBP3	0.604809808249068
CIC	PICK1	0.387269978508073
CIC	PYCR2	-0.139713543020894
CIC	SEC62	-0.50889529528986
CIC	SETD2	0.264251737457576
CIC	TRIM22	-0.198790891174754
CIC	ZNRD1	0.185727458940337
CIITA	HDAC4	-0.491027160123551
CIITA	NCOA1	-0.646366329369859
CIITA	RFX5	0.704313186813187
CIITA	RFXANK	0.203711242631836
CIITA	XPO1	-0.717023201367792
CITED1	CREBBP	-0.570549765275093
CITED1	EP300	-0.611501625926158
CITED1	ESR1	0.448668760869638
CITED1	HSPA8	-0.241079524630541
CITED1	SMAD4	-0.521479988144623
CITED1	TFAP2B	0.343055308439204
CNOT4	CNOT1	0.411405394392163
CNOT4	UBE2D2	0.274650032371033
CNOT4	UBE2D3	0.475896957283534
CNOT4	UBE2D4	-0.651620726577679
CNOT4	UBE2E1	0.565210995465596
CNOT4	UBE2E3	0.279889749870413
CNOT7	BTG1	0.341759433982149
CNOT7	BTG2	-0.510226564364812
CNOT7	CDK2	0.22382794479956
CNOT7	CDK4	-0.192967085720495
CNOT7	CNOT6	0.438190117817772
CNOT7	PABPC1	0.590406770648706
CNOT7	TOB1	-0.567389199947339
CNOT7	TOB2	-0.475558130984005
CNOT8	BTG1	0.554722585980212
CNOT8	BTG2	-0.53236035269311
CNOT8	CNOT1	0.245238781743563
CNOT8	CNOT10	0.685977497870151
CNOT8	CNOT3	-0.346965647402896
CNOT8	MCM7	0.654069430085581
COPS2	COPS3	0.502844857013296
COPS2	COPS4	0.7152494613827
COPS2	COPS5	0.239921069053152
COPS2	COPS6	0.220015645791411
COPS2	COPS7A	-0.108350951374207
COPS2	COPS7B	-0.316242726172126
COPS2	COPS8	0.799880058785365
COPS2	CUL4A	0.465126459130536
COPS2	CUL5	0.671343018879575
COPS2	GFER	-0.681818181818182
COPS2	GPS1	0.000175051416763994
COPS2	IRF8	-0.351274237658204
COPS2	NIF3L1	0.243504485229119
COPS2	NR0B1	-0.423764225113926
COPS2	NR2F1	-0.47962808137409
COPS2	THRA	-0.506548512128032
COPS2	THRB	0.0933438993609675
COPS2	TP53	-0.271301236692602
COPS5	BCL3	-0.325624589367428
COPS5	CCNDBP1	0.649482935696997
COPS5	CDKN1B	-0.0776037560368908
COPS5	COPS2	0.239921069053152
COPS5	COPS3	0.6061932323957
COPS5	COPS4	0.664077114935446
COPS5	COPS6	0.608957156414664
COPS5	COPS7A	0.610258472329811
COPS5	COPS7B	0.681818181818182
COPS5	COPS8	0.403836319849067
COPS5	CUL4A	-0.0892967919177595
COPS5	CUL5	0.17081377155234
COPS5	ERN1	-0.113618974905781
COPS5	ESR1	-0.497449596413501
COPS5	F2RL1	-0.28692492139286
COPS5	GFER	-0.587375077819429
COPS5	GFI1B	-0.412921204698671
COPS5	GPS1	0.684315684315684
COPS5	HAND2	-0.123801647198964
COPS5	HIF1A	-0.511683349934559
COPS5	JUN	-0.153848089894601
COPS5	JUND	-0.166318964941969
COPS5	MAPK14	0.419351675978215
COPS5	MIF	0.550539618300103
COPS5	NCOA1	-0.573631262878645
COPS5	S100A7	-0.120786555979318
COPS5	SMAD2	0.312019254189172
COPS5	SMAD4	-0.598901098901099
COPS5	TP53	-0.412369120871912
COPS5	TXN	0.649122807017544
COPS5	UCHL1	0.459177968735022
COPS5	UPF1	-0.182996575762115
COPS5	VHL	-0.695604395604396
CREB1	ABL1	0.620454312110066
CREB1	AKT1	-0.0421119280564735
CREB1	ATM	0.66154189801386
CREB1	ATR	-0.110033397869352
CREB1	C14orf1	0.714086771352928
CREB1	CAMK2A	-0.706106232092503
CREB1	CARM1	-0.111555589974076
CREB1	CEBPB	-0.346606940209902
CREB1	CHD3	-0.272246903423
CREB1	CREBBP	0.705393880798626
CREB1	CREM	0.285310799885877
CREB1	EP300	0.661892309994592
CREB1	FHL2	-0.667507601936786
CREB1	FHL3	0.191888662314537
CREB1	FHL5	-0.107715489186934
CREB1	GLI2	-0.290863973346427
CREB1	GSK3B	0.765058727451803
CREB1	KAT5	-0.063728123936088
CREB1	KCNIP3	-0.439415647641818
CREB1	MAPK14	0.538860190231534
CREB1	MYOD1	-0.46594156567159
CREB1	NR3C1	0.248898100468652
CREB1	PRKACA	-0.227781052799288
CREB1	PRKG1	0.778271728271728
CREB1	RAB1A	0.653260000631595
CREB1	RBBP4	0.589981453358849
CREB1	RECQL5	-0.744755564133183
CREB1	RPS6KA1	-0.541788254001237
CREB1	RPS6KA4	-0.622325652750304
CREB1	RPS6KA5	0.679538390008654
CREB1	SMARCA4	0.165864424220234
CREB1	SMARCA5	0.797538862419782
CREB1	TSSK4	-0.753444548180904
CREB1	VIM	-0.036893420696288
CREB1	YY1	0.654493819445249
CREB3	APPBP2	-0.0973173567771265
CREB3	BNIP2	-0.410809153315045
CREB3	CEBPG	-0.410335109390814
CREB3	CREB3L1	-0.030009042547093
CREB3	CREB3L3	0.0424764537864275
CREB3	DDIT3	0.563385769929384
CREB3	EMD	0.538208378397943
CREB3	HCFC1	0.411739608154302
CREB3	MALL	-0.430400054380119
CREB3	STX8	0.625503202786429
CREB3L2	PTP4A1	-0.58981317494569
CREB3L2	RND1	-0.402297121483168
CREB3L2	ZNF212	0.1901077936147
CREBBP	ABCA1	0.483266783007671
CREBBP	ACTA2	-0.385520572805612
CREBBP	AIRE	-0.296112650813987
CREBBP	AR	-0.0499187736650835
CREBBP	ATF1	0.446192002662843
CREBBP	ATF2	0.488777730363912
CREBBP	ATF3	-0.381758677046211
CREBBP	BRCA1	-0.125208022528028
CREBBP	CARM1	0.684537500281022
CREBBP	CCNC	0.355681018039044
CREBBP	CDK8	0.514690179837645
CREBBP	CDKN1A	-0.555585451008076
CREBBP	CEBPB	-0.380771060483418
CREBBP	CITED1	-0.570549765275093
CREBBP	CITED2	0.513258769807752
CREBBP	CREB1	0.705393880798626
CREBBP	CSK	0.479652109977337
CREBBP	CSNK2A2	0.591869547077364
CREBBP	CTBP1	-0.705384615384615
CREBBP	CTNNB1	0.681818181818182
CREBBP	CUX1	0.226804398157608
CREBBP	DAXX	0.474539237230954
CREBBP	DDX5	0.580333333150942
CREBBP	E2F1	-0.550329715257766
CREBBP	E2F3	0.499050863433605
CREBBP	EBF1	-0.172293015998447
CREBBP	EGR1	0.014570101055155
CREBBP	EP300	0.743889913831673
CREBBP	ESR1	-0.415369058424961
CREBBP	ETS1	0.390004190867783
CREBBP	ETS2	-0.237908883204899
CREBBP	EWSR1	0.111948587900284
CREBBP	FGFR1	0.668341307814992
CREBBP	FOS	0.0679035994441535
CREBBP	FOXM1	0.447409928215808
CREBBP	FOXO1	0.0972803209930553
CREBBP	FOXO4	-0.396634494290919
CREBBP	GATA1	-0.17223285311785
CREBBP	GCM1	-0.2499104438673
CREBBP	GLI3	0.387038832293449
CREBBP	GTF2B	0.113667020665343
CREBBP	HDAC3	0.548568537542874
CREBBP	HIF1A	0.542899124063433
CREBBP	HIPK2	-0.353662860423295
CREBBP	HMGA1	-0.362416717361126
CREBBP	HNF1A	-0.45614698169053
CREBBP	HNF4A	0.180636093184235
CREBBP	HOXA10	-0.36167232722589
CREBBP	HOXA9	-0.265422108183475
CREBBP	HOXB2	-0.220364968660149
CREBBP	HOXB3	-0.323194341937367
CREBBP	HOXB4	-0.41151099273901
CREBBP	HOXB6	-0.244029639806277
CREBBP	HOXB7	-0.471178939033187
CREBBP	HOXB9	-0.347525085517245
CREBBP	HOXD10	-0.290960889971523
CREBBP	HOXD4	-0.432178729710446
CREBBP	HTT	0.0794611190063475
CREBBP	IFNAR2	0.56043956043956
CREBBP	IKBKB	0.542422723475355
CREBBP	IKBKG	-0.142018905069727
CREBBP	ING1	-0.114568316466098
CREBBP	IRF3	-0.655663898232183
CREBBP	IRF7	-0.511556039407413
CREBBP	IRF9	-0.698885887232089
CREBBP	JUN	0.27981705016906
CREBBP	KAT2B	-0.0240054868310655
CREBBP	KAT5	-0.227030962977709
CREBBP	KHDRBS1	0.493139271051691
CREBBP	KLF1	-0.21675845249338
CREBBP	KLF13	-0.244366012223672
CREBBP	KLF4	-0.283108558213405
CREBBP	KLF5	-0.143484691685027
CREBBP	KPNA2	0.597782779224103
CREBBP	MAF	0.0200107481240442
CREBBP	MAML1	0.505106073516557
CREBBP	MDC1	0.642388809473928
CREBBP	MDM2	0.306541219843448
CREBBP	MED21	-0.287192759531966
CREBBP	MGMT	-0.690601390260564
CREBBP	MSH2	0.518835491411923
CREBBP	MSH6	0.534689292208842
CREBBP	MSX1	-0.380429614217619
CREBBP	MTDH	-0.030028265604513
CREBBP	MYB	0.552055779270968
CREBBP	MYBL1	-0.0827529325513195
CREBBP	MYBL2	0.347443932439604
CREBBP	MYC	0.493480131685921
CREBBP	MYOD1	-0.386846831396401
CREBBP	N4BP2	0.570303262391574
CREBBP	NCOA1	0.688842799223377
CREBBP	NCOA2	0.455900379316464
CREBBP	NCOA3	0.695987355467271
CREBBP	NCOA6	0.724174260673549
CREBBP	NFATC2	-0.500102379653447
CREBBP	NFATC4	-0.151776689416496
CREBBP	NFE2L2	-0.0518712853139215
CREBBP	NLK	-0.479660531982849
CREBBP	NPAS2	0.156841990347811
CREBBP	NR3C1	-0.0428233482149905
CREBBP	NUP98	0.605289151351075
CREBBP	ONECUT1	-0.321883215133139
CREBBP	PELP1	0.441088245256111
CREBBP	PHOX2A	-0.287337943017195
CREBBP	PIAS3	0.610428045635954
CREBBP	PLAGL1	0.519170012011299
CREBBP	PML	0.566065313221792
CREBBP	POLR2A	0.245613206792574
CREBBP	POU1F1	-0.105979246997857
CREBBP	PPARG	-0.64810599309223
CREBBP	PPARGC1A	-0.465622497067688
CREBBP	RBBP4	0.371297484502883
CREBBP	RBBP7	-0.186085695404905
CREBBP	RELA	0.721710349657334
CREBBP	RPA2	-0.174123208191281
CREBBP	RPS6KA1	-0.407040233827622
CREBBP	RPS6KA3	-0.353827251703902
CREBBP	RPS6KA5	0.203187547125515
CREBBP	RUNX1	-0.428875330055496
CREBBP	RUVBL1	0.468057423016965
CREBBP	SERTAD1	-0.579023868489473
CREBBP	SH3GL1	0.436265350379872
CREBBP	SMAD1	0.572094065902952
CREBBP	SMAD2	0.560164144786025
CREBBP	SMAD3	0.200835482042344
CREBBP	SMARCA4	0.75461395821552
CREBBP	SMARCB1	0.0642213401178755
CREBBP	SND1	0.145510883843559
CREBBP	SNIP1	0.576651308562283
CREBBP	SRCAP	0.718751531176954
CREBBP	SREBF1	-0.403298132699401
CREBBP	SREBF2	0.670100747265697
CREBBP	SRF	0.219427412909111
CREBBP	SS18L1	0.528976809764523
CREBBP	STAT1	-0.0291790608091513
CREBBP	STAT2	-0.328410825069912
CREBBP	STAT3	-0.113512134773254
CREBBP	STAT6	-0.198857963578212
CREBBP	TACC2	0.60609747063351
CREBBP	TCF12	0.530665543382051
CREBBP	TCF3	0.022114467481727
CREBBP	TDG	0.406069000331516
CREBBP	TGS1	0.301260175883706
CREBBP	TP53	0.594843300281523
CREBBP	TP73	0.253000368904727
CREBBP	TRIP4	0.470022967547964
CREBBP	VDR	-0.192577671126861
CREBBP	XRCC6	-0.462958239808505
CREBBP	ZBTB2	0.611673546833437
CREBBP	ZNF639	0.492229863882185
CREBZF	ATF4	-0.22722902418326
CREBZF	HCFC1	-0.647397360703812
CREBZF	ZNF512B	0.106673426920986
CREM	CD34	-0.124455656702379
CREM	CREB1	0.285310799885877
CREM	FHL5	0.451472288759649
CREM	KCNIP3	0.538098221581653
CREM	SPI1	0.458327887680125
CREM	TAF4	-0.452933896781056
CREM	TBP	-0.454199842967129
CRIP2	ATN1	0.599879904846832
CRK	ABL1	0.0888304420452765
CRK	ABL2	0.61417883613244
CRK	ARHGAP17	-0.309890948699252
CRK	ARHGAP32	-0.408754991782008
CRK	ASAP1	0.453908188585608
CRK	ATXN1	0.032043869621698
CRK	AVIL	-0.515266619104101
CRK	BCAR1	-0.505952608811516
CRK	BUB1	0.603682854497562
CRK	CBL	0.750339854576688
CRK	CBLC	0.0667050353999425
CRK	DOCK1	-0.714325471530804
CRK	DPPA4	-0.423248743688972
CRK	EFS	-0.553040687952541
CRK	EGFR	-0.501956274618416
CRK	EPHA3	0.742686031766411
CRK	EPHB3	0.0816159709958365
CRK	EPS15	-0.621217739718887
CRK	ERBB2	-0.452919573919863
CRK	ERBB3	-0.735535597523586
CRK	ERBB4	0.583207102974545
CRK	FRS2	0.611912611798222
CRK	GAB1	-0.605226118306114
CRK	GRB2	0.704498852453835
CRK	IRS4	-0.33724675214624
CRK	KHDRBS1	0.696405724177479
CRK	KIT	0.855154546099408
CRK	MAP4K1	-0.511417687550976
CRK	MAP4K5	0.551227567491962
CRK	MAPK8	0.819151288426891
CRK	NCK1	0.546788485647618
CRK	NEDD9	0.104268173806843
CRK	PDGFRA	0.461494845700353
CRK	PDGFRB	-0.493572718160627
CRK	PIK3R1	-0.383821423986397
CRK	PLSCR1	-0.596407543600485
CRK	PSMC6	0.409615902338166
CRK	PTK2	-0.651750559156147
CRK	PTPN1	0.676971735225365
CRK	PXN	-0.546536909928628
CRK	RET	-0.559790396253863
CRK	SH3BP1	-0.660541782112303
CRK	SH3KBP1	-0.470477638555487
CRK	SHB	0.613001350357619
CRK	SHC1	-0.641276780852067
CRK	SOCS1	-0.404071265580161
CRK	SOS1	0.730939752845818
CRK	SOS2	0.701630640502189
CRK	SRC	0.683598778978839
CRK	SYN1	-0.593507805575458
CRK	WEE1	0.606790343829898
CRK	XPO1	0.718700960401484
CRK	ZAP70	-0.443100975029623
CRY1	ARNTL	-0.556978543548063
CRY1	CBLB	0.731742276637522
CRY1	CSNK1E	0.579783080860394
CRY1	FBXL3	0.479334496393517
CRY1	MDFI	0.46762210600195
CRY1	PER1	-0.661308315903644
CRY1	PER2	0.14831089742539
CRY1	PLSCR1	-0.539562041944882
CRY1	TRAF2	-0.181849367710767
CSRP1	ACTN1	0.571427233583502
CSRP2	CSRP2BP	-0.252784291355407
CSRP2	PIAS1	-0.672821708926109
CTNNBIP1	BEND5	0.408527895919831
CTNNBIP1	CASP4	-0.542692307692308
CTNNBIP1	CPVL	0.462998522960239
CTNNBIP1	CTNNB1	0.135623678646935
CTNNBIP1	CTSA	0.0833108475594662
CTNNBIP1	GLB1	-0.089302867465387
CTNNBIP1	GOT2	0.349013650511974
CTNNBIP1	JUP	0.671077779584511
CTNNBIP1	PNMA2	-0.611580270209685
CTNNBIP1	PPP2R1A	0.707574918615959
CTNNBIP1	RPA3	-0.264912399601407
CUL2	CAB39	0.714100209852903
CUL2	CAND1	0.714807478601613
CUL2	CMBL	0.334861170362404
CUL2	COMMD1	0.275711784636246
CUL2	CUL4B	0.633062862200011
CUL2	DLG3	0.401107589736179
CUL2	FAF1	0.617296503062128
CUL2	FAF2	0.490001956340109
CUL2	FEM1C	0.105161389341716
CUL2	GPS1	0.271493826319236
CUL2	HIF1A	-0.0175663550945727
CUL2	KCTD5	-0.061213441762331
CUL2	KLHDC3	0.313824054609191
CUL2	MED8	0.450675806284421
CUL2	NEDD8	0.108243419737753
CUL2	P4HB	0.371370967741936
CUL2	PCNA	0.561874300805351
CUL2	PFKFB3	-0.56247055155736
CUL2	RBX1	0.545068655338263
CUL2	RNF7	0.60121827280805
CUL2	RNMTL1	0.108061888198065
CUL2	STOM	-0.390628546016256
CUL2	TCEB1	0.589106794524555
CUL2	TCEB2	0.47920675493864
CUL2	TFE3	-0.00894338889400853
CUL2	TIMM13	0.168462040561968
CUL2	UBB	-0.283742769932193
CUL2	UBC	0.112876613157729
CUL2	UBR1	0.671432504280585
CUL2	UBXN7	0.609985895048299
CUL2	VHL	-0.250398852942649
CUL2	ZER1	0.2162129517258
CUL2	ZYG11B	0.798235199733139
CUL4B	CAND1	0.749968088421609
CUL4B	CUL2	0.633062862200011
CUL4B	CUL3	0.731449406368154
CUL4B	CUL4A	0.733938052752346
CUL4B	DCUN1D3	0.072558689461137
CUL4B	DDB1	-0.0187374999374852
CUL4B	DDB2	-0.140566814231612
CUL4B	DTL	0.64091990285257
CUL4B	GRWD1	-0.708467741935484
CUL4B	NEDD8	-0.412777323570614
CUL4B	RBBP5	0.603834456375573
CUL4B	RBX1	0.498955894344865
CUL4B	RFWD2	0.682317190081043
CUL4B	SMU1	0.764746994452471
CUL4B	SNRNP40	0.204813418838719
CUL4B	TLE1	0.39273860943993
CUL4B	TLE2	-0.57434300827571
CUL4B	TLE3	0.488361622784648
CUL4B	UBXN7	0.742760479820226
CUL4B	WDR26	0.754214196102196
CUL4B	WDR5B	0.487278830772839
CUL4B	WDR61	-0.00884776378043232
CUL4B	WDR76	0.544357017752233
CUL4B	WDR82	0.190953002305651
DACH1	HDAC3	-0.737296875121797
DACH1	NAGK	-0.653446553446554
DACH1	NCOR1	-0.41014799154334
DACH1	SIN3A	-0.284879608313681
DACH1	SMAD3	0.583882313850717
DACH1	SMAD4	-0.603535998884836
DACH1	UBE2I	-0.07195808224034
DDIT3	ATF2	-0.645932952457979
DDIT3	ATF3	0.623407815829823
DDIT3	ATF4	0.772727272727273
DDIT3	BATF3	0.584677139474254
DDIT3	C14orf80	0.455185789057239
DDIT3	CEBPB	0.265839037934704
DDIT3	CEBPE	0.159580140736404
DDIT3	CEBPG	-0.693687071260462
DDIT3	CREB3	0.563385769929384
DDIT3	DBP	0.637150330882763
DDIT3	FOS	0.380880501717851
DDIT3	FOSL1	0.237208110603721
DDIT3	HSD17B14	0.708129924341379
DDIT3	JUN	0.176880569130262
DDIT3	JUND	0.586855843616937
DDIT3	MAFG	0.361300643372358
DDIT3	MAPK14	-0.223146442438406
DDIT3	NFIL3	-0.718644615159679
DDIT3	PICALM	-0.517297128719095
DDIT3	SPOP	-0.552540258913698
DEAF1	ASCC2	-0.369720577359526
DEAF1	LMO4	0.557269261262027
DEDD	CASP10	-0.558299228328479
DEDD	CASP8	-0.69805092265772
DEDD	CCDC59	0.5872988177256
DEDD	CFLAR	-0.510944424037479
DEDD	DEDD2	0.44749093268088
DEDD	FADD	0.4583207916589
DEDD	KHK	0.194592986455777
DEDD	KRT18	0.262392379566801
DEDD	RANBP3	0.556468890806518
DR1	DRAP1	0.45056571103063
DR1	NFIL3	0.59453753880314
DR1	POLE3	0.201752611008479
DR1	TTF2	-0.521964856860019
E2F1	ARID3A	0.369624578189572
E2F1	ATM	-0.27420190368606
E2F1	ATR	-0.0210633085750174
E2F1	BRCA1	0.634355951290814
E2F1	BRD2	-0.64300093012079
E2F1	CCNA1	-0.314504206823748
E2F1	CCNA2	-0.528876205428479
E2F1	CDK2	-0.580769230769231
E2F1	CDK7	-0.570175438596491
E2F1	CDKN2A	0.463168225398528
E2F1	CEBPE	0.483353824952614
E2F1	CREBBP	-0.550329715257766
E2F1	CUL1	-0.362551897469378
E2F1	DDB2	-0.250839789265521
E2F1	DNMT1	-0.220278894686742
E2F1	E2F4	0.63085831971124
E2F1	FHL2	0.615563416766967
E2F1	GTF2H1	-0.502821599491033
E2F1	HDAC1	-0.203420301887166
E2F1	KAT5	0.333294223415147
E2F1	MDM2	-0.32441472408746
E2F1	MDM4	-0.433161455386518
E2F1	MGA	-0.594333303034641
E2F1	MYBL2	0.213166198583833
E2F1	NCOA3	-0.57726098143786
E2F1	NCOA6	-0.629120991639954
E2F1	NDN	-0.501109643456141
E2F1	NFKB1	0.398643350739682
E2F1	NPDC1	0.335397079173126
E2F1	PARP1	-0.146000308431738
E2F1	PHB	0.555093509819025
E2F1	PKIB	-0.0919913041816395
E2F1	PRMT2	-0.484995025051329
E2F1	PURA	0.335860625955588
E2F1	RB1	-0.388509643880854
E2F1	RBBP4	-0.672143205963702
E2F1	RBL1	-0.564583663685391
E2F1	RBL2	-0.508639020699404
E2F1	RING1	0.548238713335538
E2F1	RNF144A	-0.481822426309072
E2F1	SKP2	-0.445676864875927
E2F1	SP2	0.441336412014612
E2F1	SP3	-0.625459330266482
E2F1	SP4	-0.75178829691965
E2F1	SPIB	0.266421678300977
E2F1	TBP	-0.603208489489782
E2F1	TEAD3	0.556229282716054
E2F1	TFDP1	-0.616546095131866
E2F1	TFDP2	0.136793634104689
E2F1	TOPBP1	-0.554302896388728
E2F1	TP53BP1	-0.553458556336365
E2F1	TRRAP	-0.477004281270395
EDF1	NR1H3	0.803846153846154
EDF1	NR5A1	-0.262202983001328
EDF1	NR5A2	-0.452822580645161
EDF1	TBP	0.437735089276381
EIF3K	CCND3	0.576244298234936
EIF3K	EIF1B	0.0514329839899983
EIF3K	EIF3A	-0.657509157509158
EIF3K	EIF3B	0.578605100168199
EIF3K	EIF3C	0.617582417582418
EIF3K	EIF3D	0.553526128509971
EIF3K	EIF3E	-0.657252747252747
EIF3K	EIF3F	-0.17469575810536
EIF3K	EIF3G	0.663073372797685
EIF3K	EIF3H	0.0762207055331027
EIF3K	EIF3I	0.66037554080223
EIF3K	EIF3J	-0.040111530771659
EIF3K	EIF3L	0.271674964820126
EIF3K	EIF3M	0.190864031729936
EIF3K	EIF4A2	0.430385389900981
EIF3K	RPS10	0.623669556956908
EIF3K	RPS26	0.590587336051046
ELF2	RUNX1	-0.11188285163834
ENO1	AGTPBP1	-0.677791065508598
ENO1	FANCA	-0.477841888295653
ENO1	GAPDH	0.801496446708671
ENO1	PLG	-0.609090909090909
ENO1	SUMO4	-0.041943238916958
ENO1	TRAPPC2	-0.62348418040389
ENO1	YWHAZ	-0.294691835768239
ERC1	IKBKB	-0.335325639248238
ERC1	IKBKG	-0.232901074686503
ERC1	NFKBIA	-0.24900678883977
ERC1	RAB6A	0.66140350877193
ERC1	RAB6B	0.199594818437091
ERC1	YWHAG	0.0917512692366365
ESRRA	ESR1	0.33748345557311
ESRRA	EXOSC6	0.571103099712384
ESRRA	LYST	-0.548169521227699
ESRRA	NCOA3	-0.556624582085329
ESRRA	PPARGC1A	0.180689621005119
ESRRA	SMARCD3	0.100320865390607
ESRRG	NCOA1	-0.300851723652169
ESRRG	NR0B2	-0.121351374727297
ESRRG	PPARGC1A	0.699851679728221
ETS2	CDK10	0.240922469452289
ETS2	CREBBP	-0.237908883204899
ETS2	EP300	-0.554228730074438
ETS2	ERG	0.447183485346959
ETS2	ETS1	-0.333475048685087
ETS2	FOS	-0.256616341337485
ETS2	JUN	0.166664791887726
ETS2	NCOR1	-0.254168751888299
ETS2	NR3C1	0.804919566424512
ETS2	POU5F1	-0.531758241758242
ETS2	SPI1	0.456439688542328
ETS2	SRC	-0.596169904487613
ETS2	TWIST1	0.0886088185621526
ETS2	ZFYVE9	0.365292659550128
ETS2	ZMYND11	-0.138488816974326
EWSR1	ACTL6A	-0.115432113901071
EWSR1	AGT	-0.304849716709452
EWSR1	ARHGDIA	-0.443164658075818
EWSR1	ATN1	0.475344101248183
EWSR1	BAD	-0.169238041608595
EWSR1	BARD1	0.0677378797074463
EWSR1	BTK	-0.369459632284718
EWSR1	C10orf12	0.160834916737518
EWSR1	C19orf57	0.527121634655777
EWSR1	CCDC91	-0.376901588571739
EWSR1	CD177	-0.213689059109823
EWSR1	CD2BP2	0.371529426040392
EWSR1	CEACAM5	-0.167035938909578
EWSR1	CFDP1	0.46212260616192
EWSR1	CPSF6	0.403473477034601
EWSR1	CPSF7	0.5815112151671
EWSR1	CREBBP	0.111948587900284
EWSR1	CUEDC2	0.235426064688092
EWSR1	CXADR	0.424307979420073
EWSR1	DFFA	0.370614474813907
EWSR1	DMRTB1	-0.161613278245709
EWSR1	DYNLL2	-0.489656513871738
EWSR1	ELAVL3	0.561211341075247
EWSR1	ELAVL4	0.818181818181818
EWSR1	ELK1	-0.409662946353723
EWSR1	ERCC5	0.583856995298689
EWSR1	FAM131C	-0.170737870642779
EWSR1	FASN	0.294138335910713
EWSR1	FUS	0.678395800966538
EWSR1	GNPDA1	-0.509599994876716
EWSR1	GPBP1L1	-0.087571043438397
EWSR1	GSK3B	0.0895522599684376
EWSR1	HBP1	-0.223547738956816
EWSR1	HERPUD1	-0.632109508268288
EWSR1	HMGA1	0.314653510252165
EWSR1	HNRNPUL1	0.521253288574269
EWSR1	HSPA2	-0.399486600137007
EWSR1	KCNMB1	-0.30455467520181
EWSR1	KEL	-0.133395525675245
EWSR1	KHDRBS2	0.236887347554629
EWSR1	KRR1	0.253553864112905
EWSR1	MAGEA11	-0.505023069311366
EWSR1	MAPK1IP1L	-0.098483130497007
EWSR1	MATK	0.258785086149724
EWSR1	MDFI	-0.0594009474273987
EWSR1	MNS1	-0.126203796203796
EWSR1	MRPS18B	-0.246072722774583
EWSR1	MSC	-0.520849446330441
EWSR1	MTCP1	0.0991763112840097
EWSR1	MTMR9	0.0848408983641765
EWSR1	MVK	0.454514178188009
EWSR1	MYL6	0.162228399664815
EWSR1	MYO1F	-0.331387946035703
EWSR1	MYOZ2	-0.355839435860647
EWSR1	NBPF3	-0.19013986013986
EWSR1	NDRG1	-0.106139099344656
EWSR1	NDUFB1	-0.0301100815421821
EWSR1	NDUFV1	-0.118368236323506
EWSR1	NINL	0.733492790463161
EWSR1	NLE1	0.0470153342255045
EWSR1	NPPB	-0.108243908384175
EWSR1	NSUN4	-0.554700127111112
EWSR1	NTNG2	-0.188503056116252
EWSR1	PCBP1	-0.016833166833167
EWSR1	PDHX	-0.601853787488154
EWSR1	PGLS	0.377490612015092
EWSR1	PLSCR1	-0.158895801319091
EWSR1	POU4F1	0.178333141795815
EWSR1	PRTFDC1	-0.156137394678454
EWSR1	PRUNE2	-0.479807534751153
EWSR1	PTK2B	-0.178442385150725
EWSR1	PUF60	0.096357808857809
EWSR1	RAB37	-0.579551413228014
EWSR1	RAD23A	0.115896170002704
EWSR1	RBPMS	-0.205324180188619
EWSR1	RMND5B	-0.106077168695671
EWSR1	RPL31	0.452845806006395
EWSR1	RPS15A	0.137679305212721
EWSR1	SALL2	0.560602047048544
EWSR1	SERP2	-0.0919851014115514
EWSR1	SF1	0.390518933187172
EWSR1	SLC1A1	-0.571929824561404
EWSR1	SLC22A24	0.772727272727273
EWSR1	SMAD4	0.145139704993397
EWSR1	SMNDC1	0.161289499965022
EWSR1	SNRPC	0.204732171369372
EWSR1	SSBP2	0.480479210711769
EWSR1	STK24	-0.61528074245415
EWSR1	SUV39H2	0.618777212362636
EWSR1	TMSB4Y	0.398225629607206
EWSR1	TRIM37	-0.48014247110021
EWSR1	TRPV5	-0.296590135638775
EWSR1	TSPAN3	-0.186598000045484
EWSR1	TULP2	-0.120051973837097
EWSR1	USP7	0.386556821068095
EWSR1	VPS72	0.345383907524622
EWSR1	WBP4	-0.299065610156484
EWSR1	WDR37	-0.494813880579108
EWSR1	WWP2	-0.070003021172376
EWSR1	YY1AP1	0.692251975721959
EWSR1	ZDHHC3	-0.9
EWSR1	ZNF165	-0.19357182928786
EZH1	EED	0.411320665697573
FARSA	FARSB	0.138183924234219
FGD1	CDC42	0.641404151518065
FHL1	AKAP12	-0.0267825008956696
FHL1	FHL2	-0.244689534275122
FHL1	RBPJ	-0.232877793725309
FHL1	RING1	0.046634317159143
FHL2	AK1	-0.0914477193027937
FHL2	AR	0.528587777145475
FHL2	ATF3	0.554752875750282
FHL2	ATXN1	0.546120428331449
FHL2	BRCA1	-0.836363636363636
FHL2	CAPN1	0.274921660880693
FHL2	CKM	0.351449124568473
FHL2	CREB1	-0.667507601936786
FHL2	CSK	-0.210542128949656
FHL2	CTNNB1	0.24838035539892
FHL2	DPF2	0.1341543159752
FHL2	E2F1	0.615563416766967
FHL2	E2F3	-0.261088383708432
FHL2	E2F4	0.601198712199912
FHL2	EIF6	0.324750387235999
FHL2	ESR1	-0.223205010446721
FHL2	FHL1	-0.244689534275122
FHL2	FHL3	-0.382249678411121
FHL2	ID3	-0.110539225833174
FHL2	IGFBP5	-0.401823121977626
FHL2	IKZF4	-0.62330920970701
FHL2	ITGA3	0.627329030604947
FHL2	ITGA7	0.0697062423477538
FHL2	ITGB1	0.000572551397775484
FHL2	ITGB2	0.548404343744527
FHL2	ITGB6	0.316505843730533
FHL2	MAPK1	0.454205453947495
FHL2	MCM7	-0.639475703770056
FHL2	PFKM	0.634105071711162
FHL2	PHB2	0.125233547414991
FHL2	PSEN2	0.466448297773538
FHL2	PUF60	0.442385032600015
FHL2	SAP30BP	-0.551602056000294
FHL2	SFPQ	-0.713883350923832
FHL2	STAT3	0.332219382861143
FHL2	TRAF6	-0.405479544925587
FHL2	TTN	-0.608791208791209
FHL2	ZBTB16	0.379612574757792
FHL2	ZFYVE9	0.458176263014775
FHL2	ZNF212	0.025987818630161
FHL2	ZNF3	-0.67935205819165
FHL2	ZNF331	0.576923076923077
FHL2	ZNF408	-0.055108099854501
FHL2	ZNF626	-0.677888777888778
FHL2	ZNF638	-0.664159994335132
FOXN3	EXOSC8	0.751288871692966
FOXO4	CREBBP	-0.396634494290919
FOXO4	CTNNB1	-0.332027535545174
FOXO4	ESR1	-0.237132393390394
FOXO4	SMAD3	0.722826042080999
FOXO4	SMAD4	-0.601585417106245
FOXO4	XPO1	-0.614169611872581
FRYL	BAK1	-0.615112952761214
FRYL	DISC1	-0.545411075844956
FRYL	HOMER3	-0.135085587460861
FRYL	YWHAB	0.082173331182437
FRYL	YWHAG	-0.285041913874046
FUBP1	AIMP2	0.547898989526302
FUBP1	CCNH	0.427366499049953
FUBP1	CHD3	0.631117819060619
FUBP1	CRMP1	0.607151292161796
FUBP1	GTF2H1	0.389710256823218
FUBP1	MAPK14	0.527423454584183
FUBP1	MYOC	-0.397273096399877
FUBP1	SMN1	0.781818181818182
FUBP1	SNCG	-0.771905987853407
FUBP1	TLE1	0.381265332447795
FUBP1	VIM	0.497594307031177
GABPB1	CIC	-0.385750493469469
GABPB1	GABPA	0.702530094238157
GABPB1	LMO3	0.704637632779423
GABPB1	MAGEB18	0.026245101672618
GABPB1	RYBP	0.730734957162379
GABPB1	TDRD7	-0.736363636363636
GABPB1	USO1	-0.0276075089396545
GABPB1	YAF2	0.782278281336102
GCLC	GCLM	0.634369746242218
GTF2B	ATF4	0.300708705818865
GTF2B	BCL3	-0.356874784356297
GTF2B	CREBBP	0.113667020665343
GTF2B	CTBP1	0.220517182808859
GTF2B	CTDP1	-0.574321847507332
GTF2B	DHX9	0.15096679063565
GTF2B	EP300	-0.407064123150823
GTF2B	ESR1	-0.46976562933908
GTF2B	FOXF2	-0.404750136513155
GTF2B	GTF2E1	0.475744097470537
GTF2B	GTF2E2	0.65495053669466
GTF2B	GTF2F1	0.293915500095959
GTF2B	GTF2F2	0.75915102337234
GTF2B	GTF2H4	0.584926167916525
GTF2B	HSF1	-0.652747252747253
GTF2B	IKZF1	-0.414842249107033
GTF2B	JUN	0.228646168995071
GTF2B	MED21	0.633556560239674
GTF2B	MYC	0.552329764738646
GTF2B	NCOA1	0.439110865643335
GTF2B	NCOA4	0.613896041077303
GTF2B	NR2F1	-0.162243851736914
GTF2B	NR5A1	-0.345715029925302
GTF2B	PKP2	0.736363636363636
GTF2B	POLR2A	-0.542342157601233
GTF2B	POLR2C	-0.00532966001054934
GTF2B	POLR2H	0.349737082538811
GTF2B	POLR2J	0.618181818181818
GTF2B	POLR3A	0.443420749849433
GTF2B	POU3F2	0.599743388129816
GTF2B	PSMC2	0.502736959413737
GTF2B	REL	0.356807319050554
GTF2B	RELA	0.00171724151058752
GTF2B	SAP25	-0.747252747252747
GTF2B	TAF11	0.70735301710765
GTF2B	TAF9	0.486594589096439
GTF2B	TBP	0.637240265163613
GTF2B	TBPL1	0.379538552367177
GTF2B	TCEA1	0.745490316135477
GTF2B	THRA	-0.091433991166237
GTF2F1	AHR	-0.428847302437036
GTF2F1	AR	-0.349576776552494
GTF2F1	ARNT	-0.58
GTF2F1	BRCA1	-0.489604326021713
GTF2F1	CCNT1	-0.416769994928404
GTF2F1	CDK9	0.599101385194784
GTF2F1	CTDP1	0.597456687255783
GTF2F1	ERCC2	0.610520277051797
GTF2F1	FEZ1	0.168469858881476
GTF2F1	FOS	-0.0133516483516485
GTF2F1	GTF2A1	-0.318601045947895
GTF2F1	GTF2B	0.293915500095959
GTF2F1	GTF2E1	-0.17528477203171
GTF2F1	GTF2E2	0.504438489099492
GTF2F1	GTF2F2	-0.0333416731405627
GTF2F1	GTF2H1	0.107185579278603
GTF2F1	GTF2H4	0.335726377346505
GTF2F1	HNRNPU	0.250997773552844
GTF2F1	JUN	0.42977130730384
GTF2F1	MAGEC1	-0.209138236886418
GTF2F1	MSX2	0.108176106268584
GTF2F1	MYC	0.275566113695127
GTF2F1	POLR2A	0.616944247016776
GTF2F1	POLR2B	0.438308023400709
GTF2F1	POLR2C	0.766533466533466
GTF2F1	POLR2D	0.256414526057624
GTF2F1	POLR2J	0.396056031634292
GTF2F1	PSMC2	-0.131619526545908
GTF2F1	PTN	-0.238940152953451
GTF2F1	SF3A3	0.35044825251132
GTF2F1	SNRPA	0.686607745487004
GTF2F1	SRF	0.597747252747252
GTF2F1	SRRM1	-0.247864377545174
GTF2F1	TAF1	-0.207840411623646
GTF2F1	TAF11	0.486017677730548
GTF2F1	TBP	-0.195684747460653
GTF2F1	TCEA1	-0.417332667332667
GTF2H1	AR	-0.0907395992182225
GTF2H1	CCNH	0.534740498962715
GTF2H1	CDK7	0.462623139001229
GTF2H1	E2F1	-0.502821599491033
GTF2H1	ERCC1	0.344186046511628
GTF2H1	ERCC2	-0.223163887605066
GTF2H1	ERCC3	0.512347738910579
GTF2H1	ERCC4	0.536394819981539
GTF2H1	ERCC5	0.395319765686503
GTF2H1	ESR1	-0.641509318625518
GTF2H1	FUBP1	0.389710256823218
GTF2H1	GTF2E1	0.137299869052316
GTF2H1	GTF2F1	0.107185579278603
GTF2H1	GTF2H3	0.1954819739528
GTF2H1	MMS19	0.252086342937086
GTF2H1	MNAT1	0.392831606583833
GTF2H1	POLR2A	0.0465442446255305
GTF2H1	POLR2C	0.302611486021278
GTF2H1	PSMC2	0.611771056876968
GTF2H1	RAD23B	0.588843409742486
GTF2H1	RPA1	0.464315631082537
GTF2H1	RPA2	0.512236619761001
GTF2H1	TCEA1	0.370564516129032
GTF2H1	TP53	-0.539903539612842
GTF2H1	XPA	0.491866279213733
GTF2H1	XPC	-0.563067743136247
GTF2H4	BRCA1	-0.462422103976749
GTF2H4	BTAF1	0.375295554141258
GTF2H4	CCNH	0.148609072368334
GTF2H4	CDK7	-0.7
GTF2H4	ERCC3	0.547411573791269
GTF2H4	GTF2B	0.584926167916525
GTF2H4	GTF2E1	-0.328105224477935
GTF2H4	GTF2F1	0.335726377346505
GTF2H4	GTF2H3	-0.39683110167571
GTF2H4	MED21	-0.358342476245043
GTF2H4	MNAT1	-0.472843970633132
GTF2H4	POLR2A	-0.03702859596969
GTF2H4	TBP	0.529894655159262
GTF3C1	AKTIP	-0.168474672520672
GTF3C1	ASCC2	0.378218112793184
GTF3C1	CHN1	0.0876148609684945
GTF3C1	CPE	-0.461370090551459
GTF3C1	EZH2	-0.331094882806184
GTF3C1	FGFR3	0.201252069609064
GTF3C1	GTF3C2	0.26376177839387
GTF3C1	GTF3C3	0.517017250453155
GTF3C1	GTF3C4	0.16317663626294
GTF3C1	GTF3C5	0.543131037987442
GTF3C1	IGFBP3	-0.531991665081867
GTF3C1	KLF6	-0.428079962028563
GTF3C1	MAPK10	0.366072569663812
GTF3C1	NHP2L1	0.367088049839172
GTF3C1	POLR3C	0.606106923770859
GTF3C1	PRPF38A	-0.381894767487312
GTF3C1	RBM23	0.625426507646265
GTF3C1	SUB1	-0.661203132004798
GTF3C1	TBC1D17	0.655050279253054
H1FX	HIST1H1C	0.219086043161926
H1FX	NOP56	-0.029049089613978
H1FX	NPM1	0.314473043492416
H1FX	TOP1	0.673096189604405
HABP4	C1QBP	0.362131510591678
HABP4	CHD3	-0.56823101417649
HABP4	DAXX	-0.627684816059701
HABP4	ENO2	0.655935266506134
HABP4	GNB2L1	-0.67097521898002
HABP4	HMGXB4	-0.594888831565242
HABP4	KAT5	0.371185275610503
HABP4	PIAS3	-0.252657284236232
HABP4	PRKCA	0.227360997851604
HABP4	PRMT1	-0.627078021638652
HABP4	TOPORS	-0.657108062954438
HABP4	TP53	-0.697705080735821
HABP4	UBE2I	-0.0193399568583028
HABP4	VIM	-0.616546093226511
HABP4	YBX1	-0.561113326077727
HBP1	EWSR1	-0.223547738956816
HBP1	HDAC1	0.540445925979897
HBP1	RB1	-0.0697207866302855
HBP1	RBL2	0.595145462921454
HBP1	SIN3A	0.532809469022046
HBP1	SMAD1	0.380288659745663
HBP1	TCF4	-0.065883532605181
HBP1	ZNF212	0.273530563441229
HDAC2	APPL1	0.591431600470419
HDAC2	ATR	0.089653172838765
HDAC2	BCL11B	0.678139415211652
HDAC2	BRCA1	-0.333675623432825
HDAC2	BRMS1	0.550272997118273
HDAC2	BUB3	0.568966263953321
HDAC2	CBFA2T3	-0.488502967104055
HDAC2	CDC20	0.508553392594819
HDAC2	CDH1	0.111629519602972
HDAC2	CDK7	0.400508922883915
HDAC2	CDYL	-0.405228033883354
HDAC2	CHD3	0.703761673001493
HDAC2	CHD4	-0.029410476657908
HDAC2	CSNK2A2	0.668424036468671
HDAC2	CTBP1	-0.184524056309466
HDAC2	DAXX	0.449396715992238
HDAC2	DEK	0.786628413169372
HDAC2	DNMT1	0.589183119189644
HDAC2	DNMT3B	0.559940532115752
HDAC2	EED	0.240451378465731
HDAC2	EHMT2	0.164041542086034
HDAC2	EZH2	0.681210665122272
HDAC2	FKBP3	0.130579493260762
HDAC2	GATAD2B	0.283915814996105
HDAC2	GTF2I	0.755435984275486
HDAC2	HCFC1	0.261592733821992
HDAC2	HDAC10	-0.611625072599325
HDAC2	HELLS	0.719332388752925
HDAC2	HIF1A	0.544931083811441
HDAC2	HIF1AN	-0.567759352274298
HDAC2	HIST1H3A	0.657891652502585
HDAC2	HMG20B	-0.497690854119271
HDAC2	HOPX	-0.348175447461198
HDAC2	HR	-0.799431755334502
HDAC2	HSPA4	0.608093552810201
HDAC2	IKZF1	-0.479771495112097
HDAC2	IKZF2	0.508028510820856
HDAC2	IKZF4	0.312554613823984
HDAC2	ING1	0.542607966634332
HDAC2	MAD1L1	-0.120067785673473
HDAC2	MBD2	-0.57112703803972
HDAC2	MBD3	-0.511011733832344
HDAC2	MBD3L1	-0.141908625304397
HDAC2	MIER1	0.70589753687305
HDAC2	MTA1	0.251569602119658
HDAC2	MTA2	0.835552421009823
HDAC2	MTA3	-0.369705799721284
HDAC2	MXD1	0.555913563160654
HDAC2	NCOR2	-0.71872865831512
HDAC2	NPM1	0.470478311104295
HDAC2	PA2G4	0.7010142954596
HDAC2	PHF21A	0.461468795678847
HDAC2	PML	0.433446903699099
HDAC2	PPARD	-0.608211961819989
HDAC2	PPP1R8	0.612275052300406
HDAC2	PRDM4	0.197917578628766
HDAC2	RB1	0.721765174008907
HDAC2	RBBP4	0.697523296726835
HDAC2	RBBP7	-0.0579240753333785
HDAC2	RBL1	0.646550379309791
HDAC2	RCOR1	0.661611999027012
HDAC2	RELA	0.58000446008335
HDAC2	RERE	0.537730619188863
HDAC2	RFX5	-0.611969154807088
HDAC2	RUNX1T1	0.732172589873676
HDAC2	SAP130	0.573095420931714
HDAC2	SAP30	0.0217738424953927
HDAC2	SATB1	0.236918444993602
HDAC2	SETDB1	0.156371937617947
HDAC2	SIN3A	0.694706389319018
HDAC2	SIN3B	-0.315326496846832
HDAC2	SMARCA2	0.555199367160881
HDAC2	SMARCA4	0.563122398955753
HDAC2	SMARCA5	0.297476283491195
HDAC2	SMARCB1	0.325950112942748
HDAC2	SMARCC2	0.345595510541685
HDAC2	SMARCE1	0.714269828528057
HDAC2	SMC3	0.568795948197021
HDAC2	SNW1	0.688677496359876
HDAC2	SP1	0.0167736675074015
HDAC2	SP3	0.754565757313543
HDAC2	STAT3	-0.577938510709774
HDAC2	SUDS3	0.557914546494399
HDAC2	SUV39H1	-0.640851809519464
HDAC2	SUZ12	0.675918653977343
HDAC2	TAL1	-0.623431620858827
HDAC2	TOP2A	0.688070281695786
HDAC2	TOP2B	0.782457766334665
HDAC2	VHL	0.616430304734323
HDAC2	YY1	0.624169305756069
HDAC2	ZBTB16	-0.7271774127577
HDAC2	ZMYM2	0.691589804653915
HDAC2	ZMYM3	0.554907630263345
HDAC4	ANKRA2	0.443158456286725
HDAC4	AR	-0.01666883378075
HDAC4	ATRX	0.492430885955939
HDAC4	BCL6	0.52893063049294
HDAC4	BCOR	0.211694432797349
HDAC4	BRMS1	-0.321447235535459
HDAC4	CAMK4	0.167569788852062
HDAC4	CBX5	0.340025742932402
HDAC4	CIITA	-0.491027160123551
HDAC4	CTBP1	-0.099491734613446
HDAC4	GATA1	0.637002610264301
HDAC4	GCM1	0.523655696161358
HDAC4	GNB1	-0.313732688376229
HDAC4	HDAC3	-0.605877886674929
HDAC4	HDAC5	0.560555253988447
HDAC4	IKZF1	0.505358136456658
HDAC4	IKZF2	0.248383603915859
HDAC4	IKZF4	0.705374625374625
HDAC4	MAPK1	-0.112986984959678
HDAC4	MAPK3	-0.323297933978991
HDAC4	MARK3	0.516419802991254
HDAC4	MEF2A	0.609090909090909
HDAC4	MEF2C	0.588862687699897
HDAC4	MEF2D	-0.354906542848416
HDAC4	NACC1	0.318502186786366
HDAC4	NCOR1	0.541621811481052
HDAC4	NCOR2	-0.0303711459722648
HDAC4	NR2C1	-0.463924076858338
HDAC4	NR2C2	-0.145091511521839
HDAC4	PPARD	-0.165592612663558
HDAC4	PPARG	-0.163774046839632
HDAC4	RANBP2	-0.10731266658954
HDAC4	RARA	0.562932286906174
HDAC4	RBBP4	0.223742692407177
HDAC4	REV3L	0.557235123890532
HDAC4	RFXANK	0.378488177703567
HDAC4	RUNX2	0.119025604870731
HDAC4	RXRA	-0.0246322155100002
HDAC4	SFN	-0.021973172033295
HDAC4	SIN3A	-0.19638002550804
HDAC4	SUMO2	0.173202364771108
HDAC4	SUV39H1	-0.493507491324993
HDAC4	TBL1XR1	-0.109557796586506
HDAC4	YWHAB	0.258972347029305
HDAC4	YWHAE	0.047826851094914
HDAC4	YWHAZ	0.296374614475827
HDAC4	ZBTB16	-0.219289315028402
HDAC4	ZNF354A	0.376549875079278
HDAC9	BCL6	0.16050627510126
HDAC9	CBX5	0.566190008262385
HDAC9	CTBP1	-0.241581786079987
HDAC9	ETV6	0.542262690419164
HDAC9	HDAC1	-0.692307692307693
HDAC9	HDAC3	0.499162742351585
HDAC9	HEY2	-0.428318499664814
HDAC9	HIST4H4	0.669230769230769
HDAC9	MEF2A	0.663598158946996
HDAC9	MORF4L2	0.262785511546008
HDAC9	NCOR1	0.592398217068631
HDAC9	NRIP1	0.589882959310881
HDAC9	SIN3A	0.554945054945055
HDAC9	SIN3B	-0.176037984152071
HDAC9	SUV39H1	-0.201839946077829
HEXIM1	CCNT1	-0.22447224852492
HEXIM1	CCNT2	-0.432159548035789
HEXIM1	CDK9	0.529899487784794
HEXIM1	LARP7	0.700769230769231
HEXIM1	RELA	-0.622860192860082
HIF1A	APEX1	0.648107356443404
HIF1A	ARNT	0.368846456445956
HIF1A	ARNTL	-0.530797919911888
HIF1A	CDKN2A	-0.470140315668462
HIF1A	COPS5	-0.511683349934559
HIF1A	CREBBP	0.542899124063433
HIF1A	CUL2	-0.0175663550945727
HIF1A	DAP3	0.303736596943895
HIF1A	EGLN1	0.524153124311095
HIF1A	EGLN2	-0.42868532524405
HIF1A	EGLN3	0.421934230021983
HIF1A	EP300	0.585348083546296
HIF1A	FAF2	0.644608662061353
HIF1A	HDAC1	0.641060405956721
HIF1A	HDAC2	0.544931083811441
HIF1A	HDAC3	0.588746728751134
HIF1A	HIF1AN	-0.573821681135021
HIF1A	HSP90AB1	-0.284126099371902
HIF1A	JUN	0.291972380250741
HIF1A	KAT2B	0.275304144180115
HIF1A	MAX	0.617921623455995
HIF1A	MDM2	0.625203748904655
HIF1A	MTA1	0.588241084796688
HIF1A	NCOA1	0.560655579355305
HIF1A	NDN	0.710159145178612
HIF1A	OS9	0.185892806628978
HIF1A	PSMA7	-0.407254375411295
HIF1A	PSMC3	-0.623393584053633
HIF1A	RWDD3	0.511489423968736
HIF1A	2009-09-01	-0.184163606606244
HIF1A	SP1	0.539964641878643
HIF1A	TP53	0.66472897324373
HIF1A	UBXN7	0.745777453330645
HIF1A	VHL	0.523014046807864
HIF1A	VHLL	0.0604135935902505
HIF1A	ZNF197	0.70720948420088
HLF	DBP	0.670994095943539
HMGXB4	HABP4	-0.594888831565242
HNF1A	AES	0.609265626068769
HNF1A	BCL6	-0.703296703296703
HNF1A	CALM3	0.602611341933077
HNF1A	CDX2	0.737942587251529
HNF1A	CREBBP	-0.45614698169053
HNF1A	EP300	-0.472171657043212
HNF1A	FOS	0.339614212973687
HNF1A	HNF1B	0.744449884953581
HNF1A	KAT2B	-0.600979020979021
HNF1A	PCBD2	-0.351687993856609
HNF1A	RAC3	0.291120507399577
HNF1A	RHPN2	-0.337101166626908
HNF1A	SNRPA1	0.152361275152554
HNF1A	SRC	0.630244755244755
HNF1A	STAT3	-0.512448304383788
HNRNPD	ACTB	0.147252747252747
HNRNPD	C1QBP	0.011768286971799
HNRNPD	EIF4G1	-0.614262363778894
HNRNPD	EXOSC4	-0.138337744258727
HNRNPD	HNRNPA0	0.734469214033288
HNRNPD	HNRNPA1	0.677213137667924
HNRNPD	HNRNPA2B1	0.6650432817976
HNRNPD	HNRNPA3	0.614973011990017
HNRNPD	HNRNPC	0.703135292127228
HNRNPD	HNRNPF	0.415074703860857
HNRNPD	HNRNPH1	0.668620895111832
HNRNPD	HNRNPK	0.786143910737901
HNRNPD	HNRNPL	0.635717574448521
HNRNPD	HNRNPR	0.719555642547091
HNRNPD	HNRNPU	0.756040585246866
HNRNPD	HSPA8	-0.145792212180417
HNRNPD	IGF2BP2	0.729941104411622
HNRNPD	LSM5	0.574897915226475
HNRNPD	PABPC1	0.670775192549386
HNRNPD	PAIP1	0.610969357228312
HNRNPD	PCBP1	0.376019039220016
HNRNPD	PCBP2	0.686872895968223
HNRNPD	PTBP1	0.0804991537596
HNRNPD	RBMX	0.74046806076109
HNRNPD	SAFB	0.430134625475934
HNRNPD	SF3B4	0.619711970512108
HNRNPD	SFN	-0.387642539974348
HNRNPD	SUMO4	0.556608071785835
HNRNPD	SYNCRIP	0.709046521230597
HNRNPD	U2AF2	0.204653384294254
HNRNPD	UBC	-0.340588765362434
HNRNPD	UBE2I	0.639501112024837
HNRNPD	YBX1	0.565673281711978
HNRNPUL1	BRD7	0.319114219114219
HNRNPUL1	C14orf1	0.428102479477039
HNRNPUL1	CNBP	-0.491996167129279
HNRNPUL1	CRMP1	0.485487102533696
HNRNPUL1	EWSR1	0.521253288574269
HNRNPUL1	HNRNPA0	0.502432702149359
HNRNPUL1	HNRNPF	0.680655927368088
HNRNPUL1	HNRNPH1	0.652312159607449
HNRNPUL1	HNRNPH2	-0.573823500975604
HNRNPUL1	ILF2	0.404127016235044
HNRNPUL1	MED31	-0.284278040507879
HNRNPUL1	NXF1	0.124966408430376
HNRNPUL1	POLR1E	0.292371028495278
HNRNPUL1	PRMT2	0.310466576079413
HNRNPUL1	PRPF40A	0.773826365791018
HNRNPUL1	RBMX	0.607182331461428
HNRNPUL1	SF3A2	0.714188912530308
HNRNPUL1	SF3B4	0.510301282811114
HNRNPUL1	SNRPB2	0.634106520348785
HNRNPUL1	TARDBP	0.206241319100483
HPCA	MAP3K10	0.711316276863974
HPCA	NAIP	-0.606923076923077
HPCAL1	ATXN1	0.615043745512289
HPCAL1	DTX2	0.38898261067383
HPCAL1	HMG20A	-0.547163241208882
HR	HDAC2	-0.799431755334502
HR	HDAC3	-0.673653198786591
HR	HDAC5	0.579177004475324
HR	THRA	0.133938909832166
HR	VDR	0.534854645011986
HSBP1	CCDC53	0.255618355716398
HSBP1	HSF1	-0.267402735401016
HSBP1	HSPA4	0.591226269731037
HSF2	HSF1	0.381451612903226
HSF2	NUP62	0.667048772832852
HSF2	SUMO2	0.589136184527173
HSF2	UBE2I	0.619731800201609
HTATIP2	NCOA5	-0.636172783585889
IKZF4	CHD4	0.641191396497582
IKZF4	CTBP1	-0.682307692307692
IKZF4	FHL2	-0.62330920970701
IKZF4	HDAC2	0.312554613823984
IKZF4	HDAC4	0.705374625374625
IKZF4	HDAC5	0.459066579236192
IKZF4	HDAC7	0.568146253984321
IKZF4	IKZF1	0.116623209894491
IKZF4	IKZF5	-0.152033676383888
IKZF4	NFKBIA	0.218311537240297
IKZF4	SIN3A	0.66954319187577
IKZF4	SIN3B	0.143340439162424
ILF2	DDX1	0.661288276345964
ILF2	DHX9	0.726913082423622
ILF2	EEF1G	0.697683593288432
ILF2	EIF2AK2	-0.28880990061007
ILF2	HNRNPH1	0.666848830614562
ILF2	HNRNPU	0.335603092278047
ILF2	HNRNPUL1	0.404127016235044
ILF2	ILF3	0.649298037531094
ILF2	NOP56	0.370166451726879
ILF2	PRKDC	0.74581199928389
ILF2	SF3A2	0.676884517044148
ILF2	TARDBP	0.660230663235829
ILF2	YBX1	0.355527375729313
ILF3	DHX9	0.596089040874701
ILF3	EIF2AK2	-0.361348655761377
ILF3	EIF4A3	0.638639817919611
ILF3	FUS	0.739674340601755
ILF3	GDF9	-0.03074238128674
ILF3	HNRNPA1	0.240680535152019
ILF3	HNRNPC	-0.0116019061583575
ILF3	HNRNPH2	0.111621209033311
ILF3	ILF2	0.649298037531094
ILF3	MAGEA11	-0.146813924333471
ILF3	MDFI	0.678571428571428
ILF3	MYO1C	0.739038461538462
ILF3	NCL	0.65268663645291
ILF3	NDRG1	0.447776182312184
ILF3	NOP56	0.297034028004254
ILF3	PABPC1	0.185321345321345
ILF3	PLSCR1	-0.601584333089884
ILF3	PRKDC	0.699983836259822
ILF3	PRMT1	0.723968126196888
ILF3	RPL12	0.477396889650734
ILF3	RPL14	0.322513742618301
ILF3	RPL18	0.634997972082723
ILF3	RPL24	0.052347445835818
ILF3	RPL31	0.380070674017971
ILF3	RPL7	0.57839377676587
ILF3	RPS13	0.372580638073128
ILF3	RPS26	0.818181818181818
ILF3	RPS3	0.594458011518921
ILF3	SF3A2	0.746991424196561
ILF3	SF3B1	0.713792670062035
ILF3	TARDBP	0.530734442313761
ILF3	TRIP6	-0.417648434025008
ILF3	UBC	0.3726680554106
ILF3	XPO5	0.724276381410296
ILF3	XRCC6	0.249286424980983
ILF3	ZNF346	0.720586820866257
INHBA	ACVR1	0.438360130820987
INHBA	ACVR1B	0.635037377030868
INHBA	ACVR2A	0.687748525794367
INHBA	ACVR2B	-0.030882395491857
INHBA	FST	0.422215498370779
INSM1	CCND1	0.193663771206037
INSM1	HDAC3	0.126393124357625
INSM1	SORBS1	-0.38763366513168
IRAK1	AKT1	0.0318504020060622
IRAK1	BTK	0.124183243457453
IRAK1	CHUK	-0.44826257766362
IRAK1	IKBKB	0.361760819944674
IRAK1	IL1R1	0.567596551936677
IRAK1	IL1RAP	-0.0786241927685915
IRAK1	IRAK1BP1	-0.463846153846154
IRAK1	IRAK2	0.596095627850836
IRAK1	IRAK3	-0.731868131868132
IRAK1	IRAK4	0.142766450100529
IRAK1	IRF7	0.690216088429778
IRAK1	ITGAM	0.592708883526684
IRAK1	MAP3K7	-0.400586494761836
IRAK1	MYD88	-0.521610365715062
IRAK1	NLRP12	0.613036020039556
IRAK1	PELI1	-0.451664867699582
IRAK1	PELI2	-0.589570310247809
IRAK1	PELI3	0.652042927050936
IRAK1	PRKCZ	0.61822452923731
IRAK1	SIGIRR	0.499902821418382
IRAK1	SQSTM1	0.620455343405647
IRAK1	STAT3	0.128626878319538
IRAK1	TIFA	-0.565409328106657
IRAK1	TIRAP	-0.196213589389767
IRAK1	TLR2	0.490091747672266
IRAK1	TLR4	-0.286586144141115
IRAK1	TLR9	0.68948851772214
IRAK1	TOLLIP	0.65843765566187
IRAK1	TRAF4	-0.539604836153301
IRAK1	TRAF6	-0.646173126459927
IRAK1	UBC	-0.0430905324408603
IRF2	EP300	-0.590277377549556
IRF2	IRF8	0.460977088059096
IRF2	KAT2A	0.48251540405185
IRF2	KAT2B	0.706600788602541
IRF2	NFKB1	0.652641890958259
IRF2	PRKACA	0.462056866503006
IRF2	RELA	0.254947475196769
IRF3	CREBBP	-0.655663898232183
IRF3	EP300	-0.416746837394133
IRF3	IKBKE	0.563403114693486
IRF3	IRF5	0.537911207837972
IRF3	IRF7	0.718948669601001
IRF3	PIAS4	-0.156442712192494
IRF3	PRDX1	0.509285767092853
IRF3	TBK1	-0.08021978021978
IRF9	CREBBP	-0.698885887232089
IRF9	IFNAR2	-0.225708894652546
IRF9	STAT1	0.77590080787996
IRF9	STAT2	0.707824541503582
IVNS1ABP	CHD3	0.699231516243147
IVNS1ABP	PFN2	-0.296767395262542
IVNS1ABP	VIM	0.604869816428508
JARID2	GATA4	-0.406577836435597
JUND	ATF3	0.528607064513488
JUND	BCL6	-0.157619758739965
JUND	BRCA1	0.00528178108463051
JUND	COPS5	-0.166318964941969
JUND	DDIT3	0.586855843616937
JUND	FOS	0.534921804047095
JUND	JDP2	0.654878465635285
JUND	MAPK1	-0.181927411339538
JUND	MAPK8	-0.498970048978122
JUND	MAPK9	0.041376503179029
JUND	MEN1	0.255798509487589
JUND	RFWD2	-0.421656560605557
JUND	SMAD3	0.54364718568023
KAT2A	ACTL6A	-0.737704425073803
KAT2A	ATXN7	-0.0919774740004888
KAT2A	BRCA1	-0.440979330440782
KAT2A	ENY2	-0.160030307194249
KAT2A	IRF1	0.492775888880531
KAT2A	IRF2	0.48251540405185
KAT2A	MAX	-0.488352464106071
KAT2A	MED1	-0.666444657295019
KAT2A	MED16	0.4543871968031
KAT2A	MED17	-0.809176720717639
KAT2A	MSH2	-0.618100595245094
KAT2A	MYC	-0.629948467882769
KAT2A	PRKDC	-0.678943078330569
KAT2A	RAD50	-0.616119053865345
KAT2A	RBPJ	-0.434400685451652
KAT2A	SF3B3	0.347906863549965
KAT2A	SUPT3H	-0.186060741451332
KAT2A	SUPT7L	0.486181216897832
KAT2A	TACC1	0.140954045243173
[truncated: 4,381 more rows]
